# Supplementary material for: Asymmetric synthesis of cyclopenta[b]indoles via organocatalytic formal (3 + 2) cyclization of β-keto ester with azonaphthalene
Source: Royal Society of Chemistry journal article supplement (doi:10.1039/d3qo00306j), 2023-01-01
Supplement: d3qo00306j1.pdf [file d3qo00306j1.pdf]

# Asymmetric synthesis of cyclopenta[*b*]indoles via organocatalytic formal (3+2) cyclization of $\beta$ -keto ester with azonaphthalene

Yanji Song, Shi Tang, Qianping Chen, Qingfa Tan, Weidi Cao, Xiaoming Feng and

Xiaohua Liu\*

*Key Laboratory of Green Chemistry & Technology, Ministry of Education, College of  
Chemistry, Sichuan University, Chengdu 610064, P. R. China.*

E-mail: liuxh@scu.edu.cn

## Table of contents

|                                                                                                     |     |
|-----------------------------------------------------------------------------------------------------|-----|
| 1. General Information.....                                                                         | 3   |
| 2. General procedure for the synthesis of the chiral guanidines .....                               | 4   |
| 3. Optimization of the reaction conditions.....                                                     | 5   |
| 4. Typical procedure for the catalytic asymmetric reaction. ....                                    | 11  |
| 5. General procedure for the preparation of the racemic products. ....                              | 11  |
| 6. Gram-scale synthesis of C16 and the transformations of the products. ....                        | 12  |
| 7. Unsuccessful substrates. ....                                                                    | 13  |
| 8. X-ray crystal data .....                                                                         | 14  |
| 9. The NMR study of substrates with G3.....                                                         | 16  |
| 10. Spectral characterization data for products .....                                               | 18  |
| 11. Copies of <sup>1</sup> H, <sup>13</sup> C and <sup>19</sup> F NMR spectra of the products ..... | 51  |
| 12. Copies of CD spectra of the products .....                                                      | 89  |
| 13. Reference. ....                                                                                 | 102 |

## 1. General Information

Unless otherwise noted, all catalytic reactions were run under air conditions, column chromatography was generally performed on silica gel (300–400 mesh) and reactions were monitored with thin layer chromatography (TLC) using 254 nm UV light and basic  $\text{KMnO}_4$  aqueous. NMR characterization data were collected on Bruker ASCENDTM operating at 400 MHz and 600 MHz for  $^1\text{H}$  NMR, 101 MHz and 151 MHz for  $^{13}\text{C}\{^1\text{H}\}$  NMR (with complete proton decoupling), and 565 MHz for  $^{19}\text{F}\{^1\text{H}\}$  NMR (with complete proton decoupling).  $^1\text{H}$  NMR chemical shifts were reported in ppm from tetramethylsilane with the TMS resonance as the internal standard ( $\delta = 0.00$ ).  $^{13}\text{C}$  NMR spectra chemical shifts are reported in ppm from tetramethylsilane with the solvent resonance as internal standard ( $\text{CDCl}_3$ ,  $\delta = 77.0$ ,  $(\text{CD}_3)_2\text{CO}$ ,  $\delta = 206.4$ ,  $\text{C}_6\text{D}_6$ ,  $\delta = 128.0$ ). Spectra were reported as follows: chemical shift ( $\delta$  ppm), multiplicity (s = singlet, d = doublet, t = triplet, q = quartet, m = multiplet), coupling constants (Hz), integration and assignment. High-resolution mass spectra (HRMS) were recorded on a Thermo Q-Exactive Focus (FTMS+c ESI). Enantiomeric excesses were determined by chiral SFC analysis using the corresponding commercial chiral column as stated in the experimental procedures at 25 °C with UV detector. Optical rotations were measured on Rudolph Research Analytic Automatic Polarimeter and reported as follows:  $[\alpha]_D^{25}$  (c: g/100 mL, in  $\text{CH}_2\text{Cl}_2$ ). Infrared spectra (IR) were recorded on Bruker Tensor II spectrometer with Plantium ATR accessory and the peaks are reported as absorption maxima ( $\nu$ ,  $\text{cm}^{-1}$ ). Circular dichroism (CD) spectra were recorded on Applied Photophysics Chirascan. Melting point ranges were determined on OptiMelt. X-ray crystallographic data were collected by a Bruker D8 Venture Photon II. All the solvents were purified by usual methods before use and reagents obtained from commercial sources were used without further purification. Substrates azonaphthalene<sup>1</sup>,  $\beta$ -keto ester and  $\beta$ -keto amide<sup>2</sup> were synthesized according to the literature methods.

## 2. General procedure for the synthesis of the chiral guanidines

The chiral guanidines were prepared by the similar procedure in the literatures.<sup>3, 4</sup>

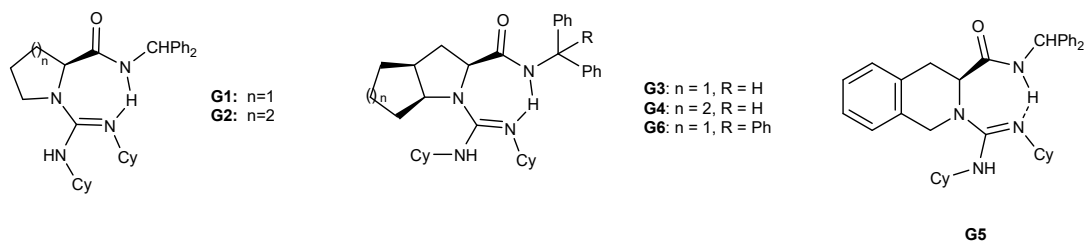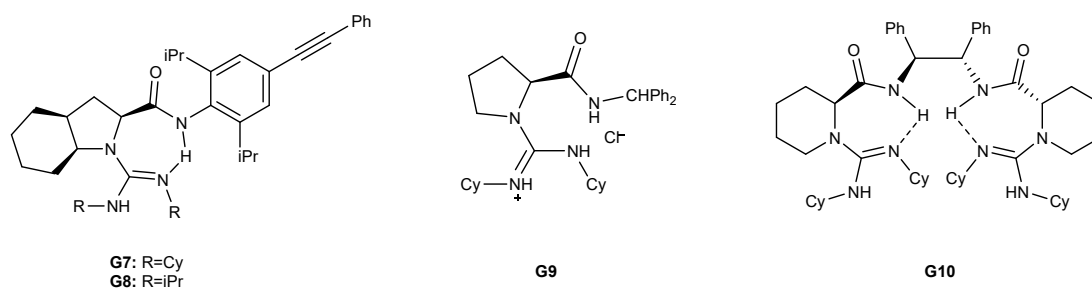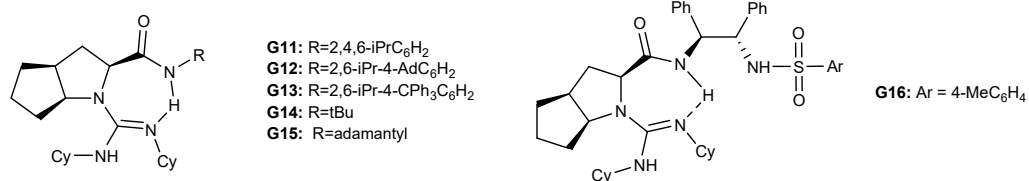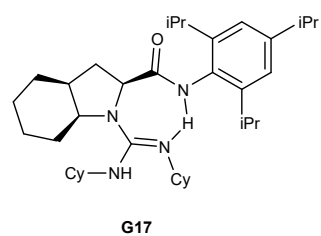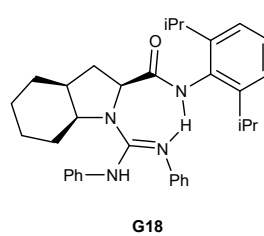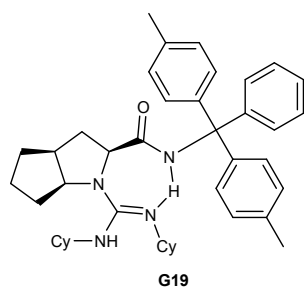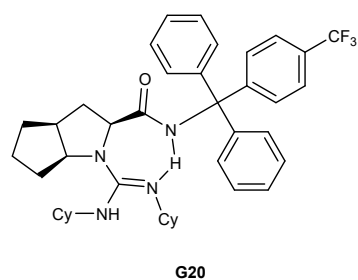



### 3. Optimization of the reaction conditions

Table S1. Screening of the chiral guanidines.

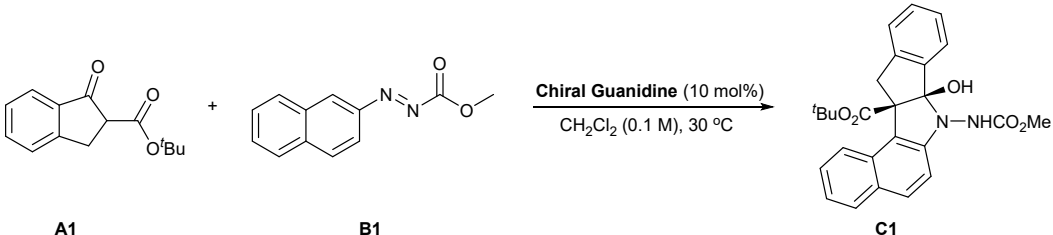

| Entry <sup>[a]</sup> | Guanidine  | Yield (%) <sup>[b]</sup> | ee (%) <sup>[c]</sup> | dr <sup>[c]</sup> |
|----------------------|------------|--------------------------|-----------------------|-------------------|
| 1                    | <b>G1</b>  | 19                       | 14                    | >19:1             |
| 2                    | <b>G2</b>  | trace                    | 0                     | >19:1             |
| 3                    | <b>G3</b>  | 31                       | 32                    | 93:7              |
| 4                    | <b>G4</b>  | 42                       | 27                    | 92:8              |
| 5                    | <b>G5</b>  | 13                       | 9                     | >19:1             |
| 6                    | <b>G9</b>  | N.R.                     | -                     | -                 |
| 7                    | <b>G10</b> | 12                       | 0                     | >19:1             |
| 8                    | <b>G16</b> | 29                       | 13                    | 53:47             |

[a] Unless otherwise noted, the reactions were carried out with **A1** (0.10 mmol), **B1** (0.10 mmol) and the catalyst (10 mol%) in CH<sub>2</sub>Cl<sub>2</sub> (0.1 M) at 30 °C for 12 h. [b] Yield of the isolated products. [c] Determined by chiral SFC.

Table S2. Screening of solvents.

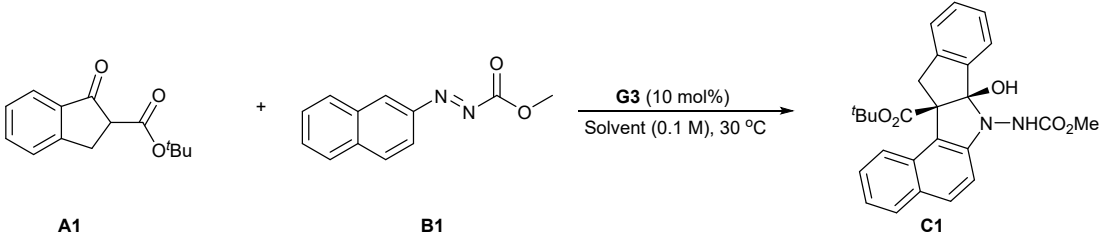

| Entry <sup>[a]</sup> | Solvent                              | Yield (%) <sup>[b]</sup> | ee (%) <sup>[c]</sup> | dr <sup>[c]</sup> |
|----------------------|--------------------------------------|--------------------------|-----------------------|-------------------|
| 1                    | CH <sub>2</sub> Cl <sub>2</sub>      | 31                       | 32                    | 93:7              |
| 2                    | THF                                  | 59                       | 0                     | >19:1             |
| 3                    | Toluene                              | 34                       | 20                    | 87:13             |
| 4                    | MeCN                                 | 90                       | 24                    | >19:1             |
| 5                    | DMF                                  | 87                       | 3                     | 95:5              |
| 6                    | CH <sub>2</sub> ClCH <sub>2</sub> Cl | 69                       | 34                    | 87:13             |
| 7                    | EtOAc                                | 60                       | 4                     | >19:1             |

|   |                   |    |    |       |
|---|-------------------|----|----|-------|
| 8 | CHCl <sub>3</sub> | 35 | 24 | 88:12 |
|---|-------------------|----|----|-------|

[a] Unless otherwise noted, the reactions were carried out with **A1** (0.10 mmol), **B1** (0.10 mmol) and the **G3** (10 mol%) in solvent (0.1 M) at 30 °C for 12 h. [b] Yield of the isolated products. [c] Determined by chiral SFC.

Table S3. Screening of temperature.

| Entry <sup>[a]</sup> | <i>T</i> °C | Yield (%) <sup>[b]</sup> | ee (%) <sup>[c]</sup> | dr <sup>[c]</sup> |
|----------------------|-------------|--------------------------|-----------------------|-------------------|
| 1                    | 10          | 49                       | 38                    | >19:1             |
| 2                    | 0           | 51                       | 57                    | >19:1             |
| 3                    | -10         | 56                       | 65                    | >19:1             |
| 4                    | -20         | 46                       | 72                    | >19:1             |
| 5                    | -30         | 39                       | 74                    | >19:1             |

[a] Unless otherwise noted, the reactions were carried out with **A1** (0.10 mmol), **B1** (0.10 mmol) and the **G3** (10 mol%) in CH<sub>2</sub>ClCH<sub>2</sub>Cl (0.1 M) at *T* °C for 12 h. [b] Yield of the isolated products. [c] Determined by chiral SFC.

Table S4. Screening of the reaction time.

| Entry <sup>[a]</sup> | Time (h) | Yield (%) <sup>[b]</sup> | ee (%) <sup>[c]</sup> | dr <sup>[c]</sup> |
|----------------------|----------|--------------------------|-----------------------|-------------------|
| 1                    | 24       | 49                       | 77                    | >19:1             |
| 2                    | 36       | 56                       | 78                    | >19:1             |
| 3                    | 48       | 66                       | 78                    | >19:1             |

[a] Unless otherwise noted, the reactions were carried out with **A1** (0.10 mmol), **B1** (0.10 mmol) and the **G3** (10 mol%) in CH<sub>2</sub>ClCH<sub>2</sub>Cl (0.1 M) at -30 °C for different times (h). [b] Yield of the isolated products. [c] Determined by chiral SFC.

Table S5. Screening of the substrate ratio.

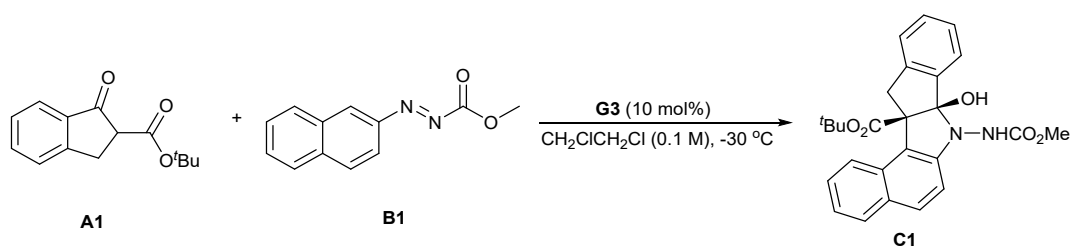

| Entry <sup>[a]</sup> | A1:B1 | Yield (%) <sup>[b]</sup> | ee (%) <sup>[c]</sup> | dr <sup>[c]</sup> |
|----------------------|-------|--------------------------|-----------------------|-------------------|
| 1                    | 1:1.1 | 66                       | 78                    | >19:1             |
| 2                    | 1:1.2 | 71                       | 78                    | >19:1             |
| 3                    | 1:1.5 | 72                       | 78                    | >19:1             |
| 4                    | 1.5:1 | 75                       | 78                    | >19:1             |
| 5                    | 1.2:1 | 72                       | 78                    | >19:1             |
| 6                    | 1.1:1 | 68                       | 78                    | >19:1             |

[a] Unless otherwise noted, the reactions were carried out with **A1**, **B1** and **G3** (10 mol%) in  $\text{CH}_2\text{ClCH}_2\text{Cl}$  (0.1 M) at  $-30\text{ }^\circ\text{C}$  for 48 h. [b] Yield of the isolated products. [c] Determined by chiral SFC.

Table S6. Rescreening of the chiral guanidines.

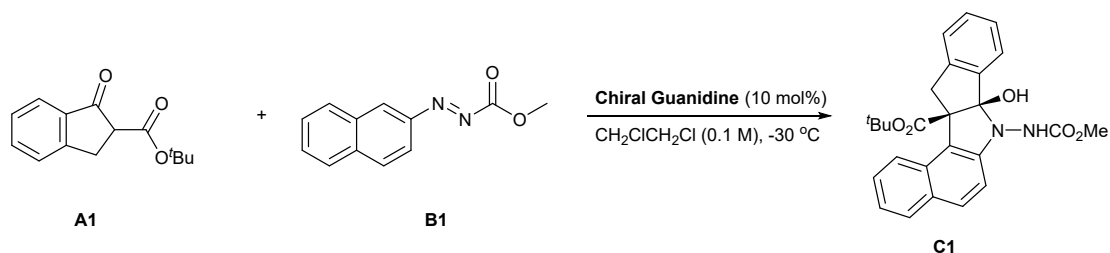

| Entry <sup>[a]</sup> | Guanidine  | Yield (%) <sup>[b]</sup> | ee (%) <sup>[c]</sup> | dr <sup>[c]</sup> |
|----------------------|------------|--------------------------|-----------------------|-------------------|
| 1                    | <b>G6</b>  | 79                       | 87                    | >19:1             |
| 2                    | <b>G11</b> | 52                       | 77                    | >19:1             |
| 3                    | <b>G12</b> | 48                       | 73                    | >19:1             |
| 4                    | <b>G13</b> | 77                       | 75                    | >19:1             |
| 5                    | <b>G14</b> | 72                       | 60                    | >19:1             |
| 6                    | <b>G15</b> | 55                       | 45                    | >19:1             |

[a] Unless otherwise noted, the reactions were carried out with **A1** (0.15 mmol), **B1** (0.10 mmol) and **chiral guanidine** (10 mol%) in  $\text{CH}_2\text{ClCH}_2\text{Cl}$  (0.5 mL) at  $-30\text{ }^\circ\text{C}$  for 48 h. [b] Yield of the isolated products. [c] Determined by chiral SFC.

Table S7. Screening of the amount of solvent.

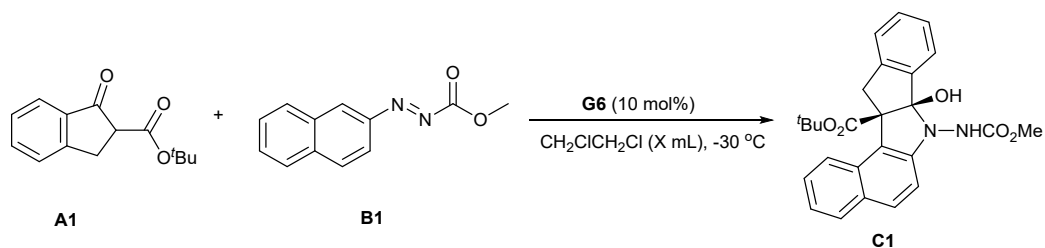

| Entry <sup>[a]</sup> | X   | Yield (%) <sup>[b]</sup> | ee (%) <sup>[c]</sup> | dr <sup>[c]</sup> |
|----------------------|-----|--------------------------|-----------------------|-------------------|
| 1                    | 0.5 | 99                       | 92                    | >19:1             |
| 2                    | 1.0 | 79                       | 87                    | >19:1             |
| 3                    | 1.5 | 73                       | 85                    | >19:1             |

[a] Unless otherwise noted, the reactions were carried out with **A1** (0.15 mmol), **B1** (0.10 mmol) and **G6** (10 mol%) in  $\text{CH}_2\text{ClCH}_2\text{Cl}$  (X mL) at  $-30\text{ }^\circ\text{C}$  for 48 h. [b] Yield of the isolated products. [c] Determined by chiral SFC.

Table S8. Screening of the additives.

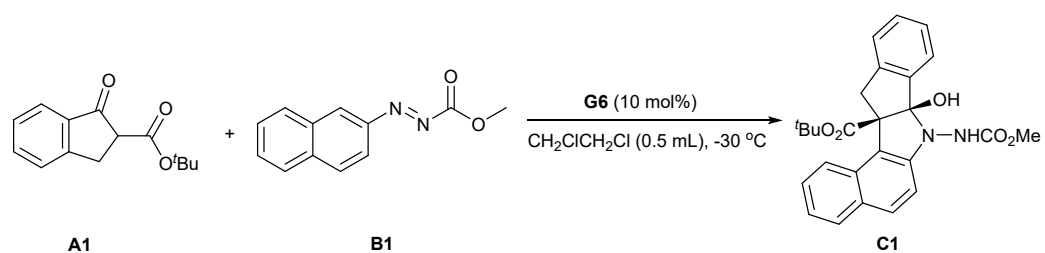

| Entry <sup>[a]</sup> | Additives                             | Yield (%) <sup>[b]</sup> | ee (%) <sup>[c]</sup> | dr <sup>[c]</sup> |
|----------------------|---------------------------------------|--------------------------|-----------------------|-------------------|
| 1                    | 3 Å MS (20 mg)                        | 99                       | 89                    | >19:1             |
| 2                    | 4 Å MS (20 mg)                        | 99                       | 90                    | >19:1             |
| 3                    | 5 Å MS (20 mg)                        | 99                       | 91                    | >19:1             |
| 4                    | $\text{Na}_2\text{SO}_4$ (20 mol%)    | 99                       | 89                    | >19:1             |
| 5                    | TMG (10 mol%)                         | 98                       | 9                     | >19:1             |
| 6                    | $\text{NaBAR}^{\text{F}}_4$ (10 mol%) | 94                       | 16                    | >19:1             |
| 7                    | $\text{NEt}_3$ (10 mol%)              | 86                       | 88                    | >19:1             |
| 8                    | --                                    | 99                       | 92                    | >19:1             |
| 9 <sup>[d]</sup>     | --                                    | 97                       | 91                    | >19:1             |
| 10 <sup>[e]</sup>    | --                                    | 77                       | 89                    | >19:1             |
| 11 <sup>[f]</sup>    | --                                    | 68                       | 90                    | >19:1             |

[a] Unless otherwise noted, the reactions were carried out with **A1** (0.15 mmol), **B1** (0.10 mmol) and **G6** (10 mol%) in  $\text{CH}_2\text{ClCH}_2\text{Cl}$  (0.5 mL) at  $-30\text{ }^\circ\text{C}$  for 48 h. [b] Yield of the isolated products. [c] Determined by chiral SFC. [d] 5 mol% **G6** were used. [e] 5 mol% **G19** were used. [f] 5 mol% **G20** were used.

Table S9. Screening of the chiral guanidines for **A15**.

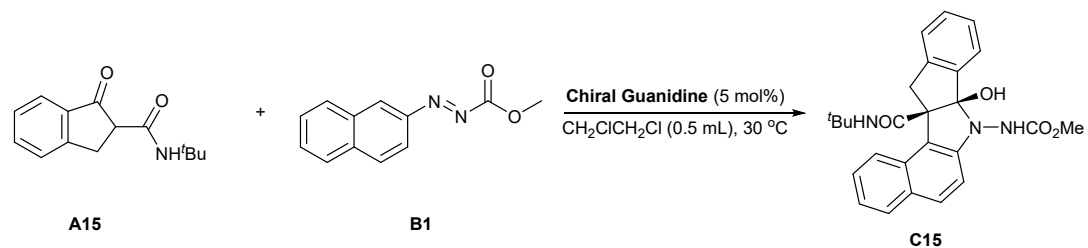

| Entry <sup>[a]</sup> | Guanidine  | Yield (%) <sup>[b]</sup> | ee (%) <sup>[c]</sup> | dr <sup>[c]</sup> |
|----------------------|------------|--------------------------|-----------------------|-------------------|
| 1                    | <b>G1</b>  | 83                       | -2                    | 54:46             |
| 2                    | <b>G2</b>  | 98                       | 4                     | 61:39             |
| 3                    | <b>G3</b>  | 95                       | 10                    | 55:45             |
| 4                    | <b>G4</b>  | 86                       | 19                    | 73:27             |
| 5                    | <b>G5</b>  | trace                    | -                     | -                 |
| 6                    | <b>G6</b>  | 99                       | 18                    | 83:17             |
| 7                    | <b>G7</b>  | 95                       | 22                    | 71:29             |
| 8                    | <b>G8</b>  | 87                       | 16                    | 71:29             |
| 9                    | <b>G17</b> | 90                       | 21                    | 74:26             |
| 10                   | <b>G18</b> | trace                    | -                     | -                 |

[a] Unless otherwise noted, the reactions were carried out with **A15** (0.15 mmol), **B1** (0.10 mmol) and **chiral guanidine** (5 mol%) in CH<sub>2</sub>ClCH<sub>2</sub>Cl (0.5 mL) at 30 °C for 24 h. [b] Yield of the isolated products. [c] Determined by chiral SFC.

Table S10. Screening of solvents.

**A15**
**B1**
**C15**

| Entry <sup>[a]</sup> | Solvent       | Yield (%) <sup>[b]</sup> | ee (%) <sup>[c]</sup> | dr <sup>[c]</sup> |
|----------------------|---------------|--------------------------|-----------------------|-------------------|
| 1                    | THF           | 89                       | 8                     | 74:26             |
| 2                    | Toluene       | 92                       | 34                    | 81:19             |
| 3                    | MeCN          | 63                       | 0                     | 58:42             |
| 4                    | <i>i</i> PrOH | 78                       | 5                     | 89:11             |

---

|   |            |    |    |       |
|---|------------|----|----|-------|
| 5 | EtOAc      | 66 | 30 | 69:31 |
| 6 | DMF        | 98 | 0  | 93:7  |
| 7 | Mesitylene | 71 | 34 | 75:25 |

---

[a] Unless otherwise noted, the reactions were carried out with **A15** (0.15 mmol), **B1** (0.10 mmol) and **G7** (5 mol%) in solvent (0.5 mL) at 30 °C for 24 h. [b] Yield of the isolated products. [c] Determined by chiral SFC.

#### 4. Typical procedure for the catalytic asymmetric reaction.

##### 1. Typical procedure for the catalytic asymmetric reaction with $\beta$ -keto ester.

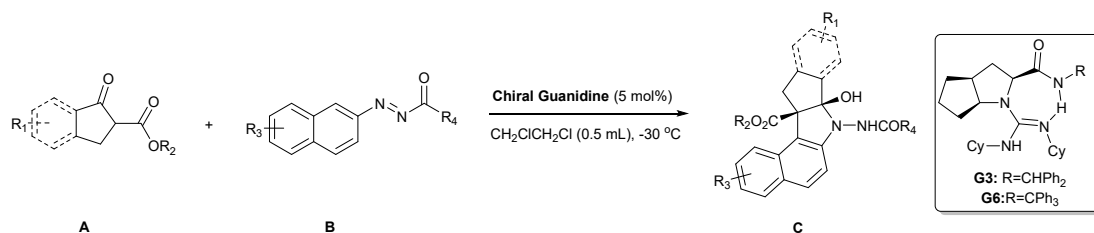

An oven-dried test tube was charged with **A** (0.15 mmol), **B** (0.10 mmol), **chiral guanidine** (5 mol%) and  $\text{CH}_2\text{ClCH}_2\text{Cl}$  (0.5 mL), the reaction mixture was stirred at  $-30\text{ }^\circ\text{C}$  and detected by TLC. After the reaction was completed, the residue was subjected to column chromatography (silica gel, eluent: petroleum ether/ethyl acetate = 5:1 to 1:1) to afford the desired products. (**G6** were used for **C1-C14**, **G3** were used for **C16-C19**, **C21-C31**)

##### 2. Typical procedure for the catalytic asymmetric reaction with $\beta$ -keto amide.

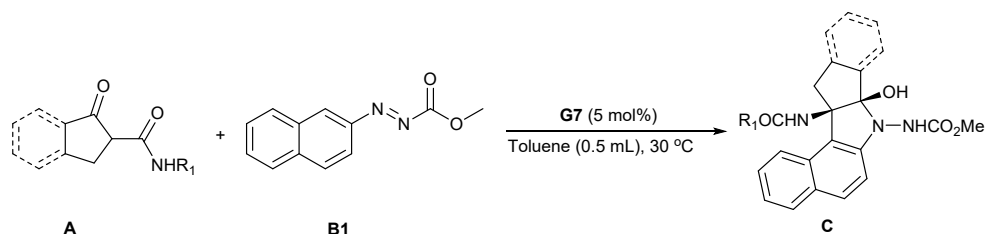

An oven-dried test tube was charged with **A** (0.15 mmol), **B1** (0.10 mmol), **G7** (5 mol%) and toluene (0.5 mL), the reaction mixture was stirred at  $30\text{ }^\circ\text{C}$  and detected by TLC. After the reaction was completed, the residue was subjected to column chromatography (silica gel, eluent: petroleum ether/ethyl acetate = 5:1 to 1:1) to afford the desired products **C15**, **C20**.

#### 5. General procedure for the preparation of the racemic products.

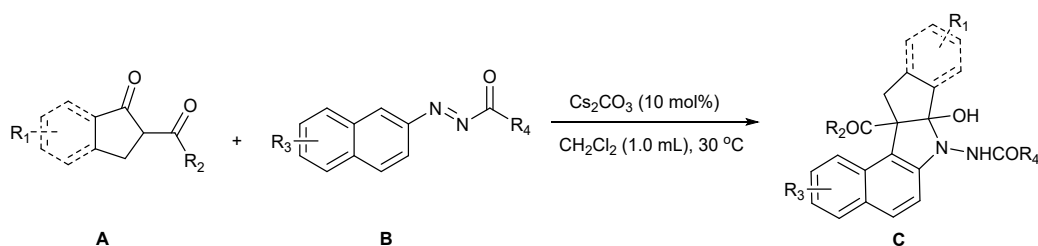

An oven-dried test tube was charged with **A** (0.10 mmol), **B** (0.10 mmol),  $\text{Cs}_2\text{CO}_3$  (10 mol%) and  $\text{CH}_2\text{Cl}_2$  (1.0 mL), the reaction mixture was stirred at  $30\text{ }^\circ\text{C}$  about 2 h and detected by TLC. After the reaction was completed, the residue was subjected to column chromatography (silica gel, eluent: petroleum ether/ethyl acetate = 5:1 to 1:1) to afford the racemic products **C**.

## 6. Gram-scale synthesis of **C16** and the transformations of the products.

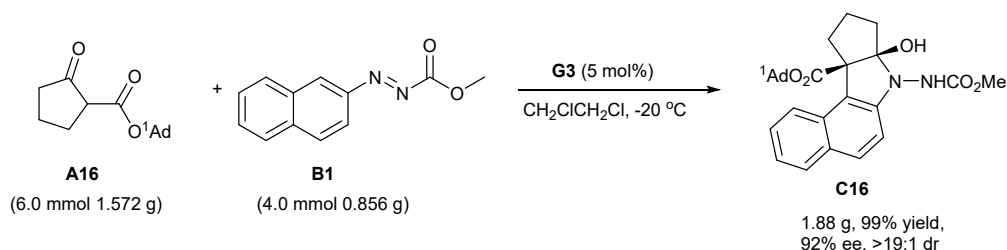

An oven-dried test tube was charged with **A16** (6.0 mmol), **B1** (4.0 mmol), **G3** (0.2 mmol, 5 mol%), and  $\text{CH}_2\text{ClCH}_2\text{Cl}$  (20.0 mL). Then, the reaction mixture was stirred at  $-20\text{ }^\circ\text{C}$  and detected by TLC. After the reaction was completed, remove the solvent by the vacuum evaporator, and the residue was subjected to the silica gel column chromatography (eluent: petroleum ether/ethyl acetate = 3:1) to afford the product **C16** (1.88 g, 99% yield, 92% ee, >19:1 dr).

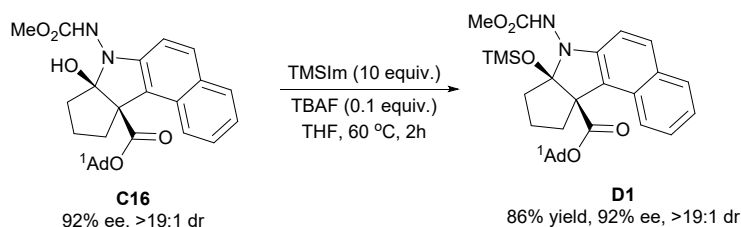

An oven-dried test tube was charged with **C16** (0.1 mmol, 47.6 mg, 92% ee, >19:1 dr) and THF (2.0 mL) followed by adding TMSIm (140  $\mu\text{L}$ , 1.0 mmol, 10.0 equiv.), and TBAF (2.6 mg, 0.01 mmol, 0.1 equiv.). After stirred for 2 h at  $60\text{ }^\circ\text{C}$  and detected by TLC. After the reaction was completed, the reaction was quenched with saturated aqueous  $\text{NaHCO}_3$  (5 mL) and extracted with ethyl acetate (3 $\times$ 5 mL). The combined organic layers were dried over anhydrous  $\text{Na}_2\text{SO}_4$ , filtered and concentrated in vacuo and the crude residue was purified by flash-column chromatography on silica gel (eluent: petroleum ether/ethyl acetate = 4:1) to afford the desired product **D1** (47.1 mg, 86% yield, 92% ee, >19:1 dr).

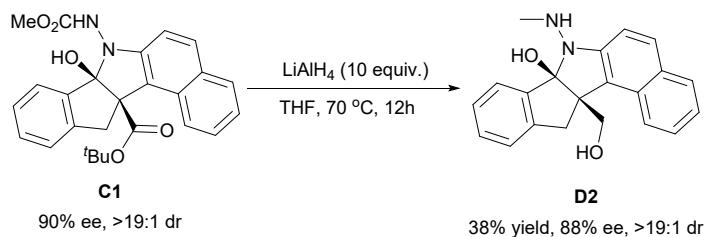

Compound **C1** (44.6 mg, 0.1 mmol, 90% ee, >19:1 dr) was treated with  $\text{LiAlH}_4$  (38.0 mg, 1.0 mmol, 10 eq) in THF (1.0 mL) at  $70\text{ }^\circ\text{C}$  for 12 h. After finished, the reaction was quenched with  $\text{H}_2\text{O}$  (5 mL). The solution was extracted with  $\text{CH}_2\text{Cl}_2$  (3 $\times$ 5 mL). The combined extracts were washed with brine (8.0 mL), dried ( $\text{Na}_2\text{SO}_4$ ), filtered and concentrated in vacuo. The crude product was purified by flash-column chromatography on silica gel (eluent: petroleum ether/ethyl acetate = 2:1) gave **D2** (12.6 mg, 38% yield, 88% ee, >19:1 dr).



## 7. Unsuccessful substrates.

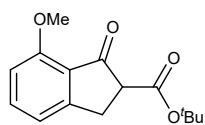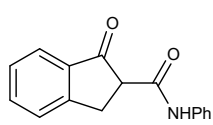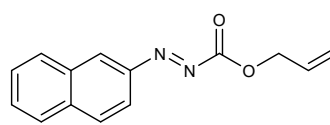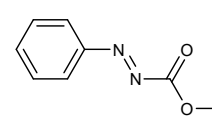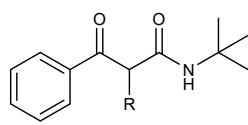

N.R.

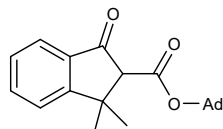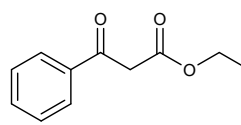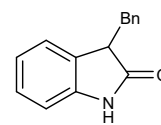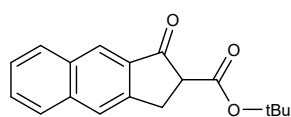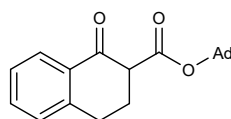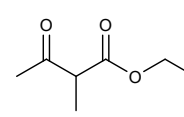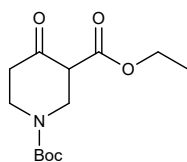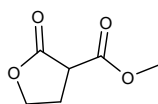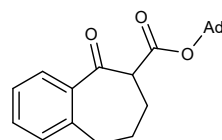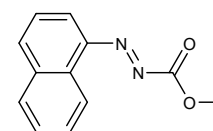

## 8. X-ray crystal data

Crystals suitable for the X-ray crystal structure analysis were obtained from a solution of compound **C21** in CH<sub>2</sub>Cl<sub>2</sub> and petroleum ether at rt. CCDC 2212549 contains the supplementary crystallographic data for this paper. These data are provided free of charge by The Cambridge Crystallographic Data Centre.

The colourless crystal in rod-shape, with approximate dimensions of 0.074 × 0.113 × 0.468 mm<sup>3</sup>, was selected and mounted for the single-crystal X-ray diffraction. The data set was collected by Bruker D8 Venture Photon II diffractometer at 143(2) K equipped with micro-focus Cu radiation source ( $K_{\alpha} = 1.54178\text{\AA}$ ). Applied with face-indexed numerical absorption correction, the structure solution was solved and refinement was processed by SHELXTL (version 6.14) and OLEX 2.3 program package<sup>a, b, c, d</sup>. The structure was analyzed by ADDSYM routine implemented in PLATON suite and no higher symmetry was suggested.<sup>e</sup>

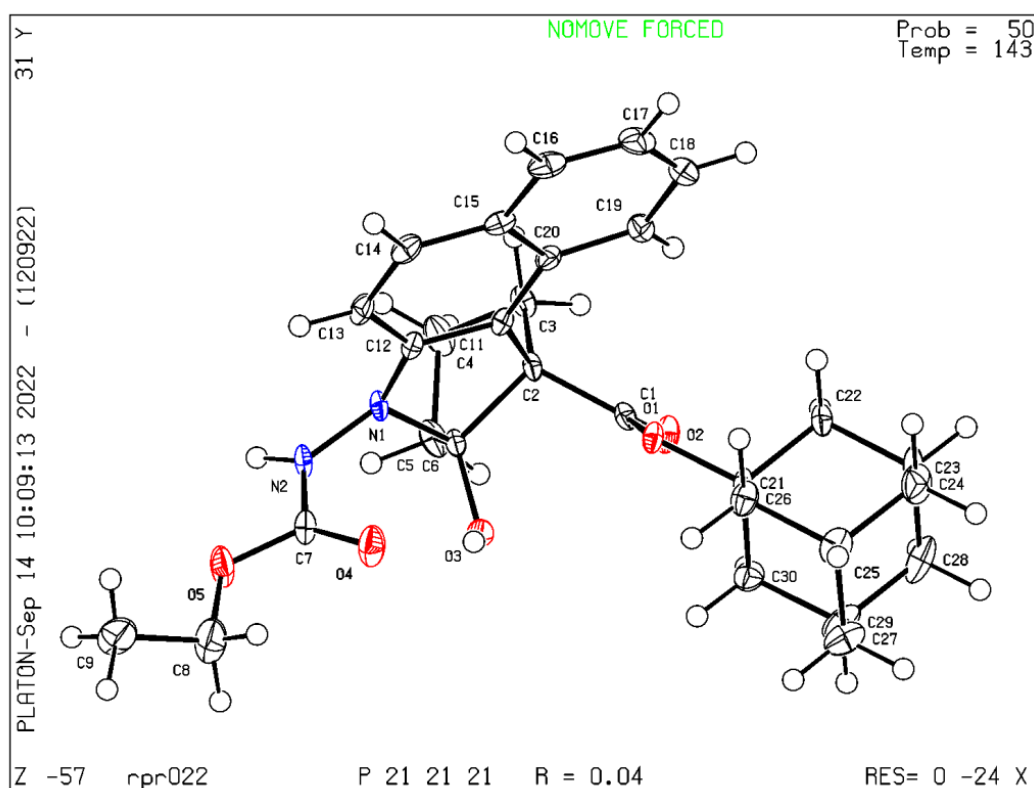

### Crystallographic Data for **C21**.

|                    |                                                                              |
|--------------------|------------------------------------------------------------------------------|
| Formula            | C <sub>29</sub> H <sub>34</sub> N <sub>2</sub> O <sub>5</sub> ( <b>C21</b> ) |
| Formula mass (amu) | 490.58                                                                       |
| Space group        | P 21 21 21                                                                   |
| <i>a</i> (Å)       | 10.5032(4)                                                                   |
| <i>b</i> (Å)       | 12.2302(5)                                                                   |
| <i>c</i> (Å)       | 19.6985(7)                                                                   |
| $\alpha$ (deg)     | 90                                                                           |

|                                                   |             |
|---------------------------------------------------|-------------|
| $\beta$ (deg)                                     | 90          |
| $\gamma$ (deg)                                    | 90          |
| $V$ (Å <sup>3</sup> )                             | 2530.40(17) |
| $Z$                                               | 4           |
| $\lambda$ (Å)                                     | 1.54178     |
| $T$ (K)                                           | 143 K       |
| $\rho_{\text{calcd}}$ (g cm <sup>-3</sup> )       | 1.288       |
| $\mu$ (mm <sup>-1</sup> )                         | 0.711       |
| Transmission factors                              | 0.604-1.000 |
| $\theta_{\text{max}}$ (deg)                       | 68.342      |
| No. of unique data, including $F_o^2 < 0$         | 4512        |
| No. of unique data, with $F_o^2 > 2\sigma(F_o^2)$ | 4278        |
| No. of variables                                  | 334         |
| $R(F)$ for $F_o^2 > 2\sigma(F_o^2)$ <sup>a</sup>  | 0.0381      |
| $R_w(F_o^2)$ <sup>b</sup>                         | 0.0968      |
| Goodness of fit                                   | 1.045       |

---

<sup>a</sup>  $R(F) = \sum ||F_o| - |F_c|| / \sum |F_o|$ .

<sup>b</sup>  $R_w(F_o^2) = [\sum [w(F_o^2 - F_c^2)^2] / \sum wF_o^4]^{1/2}$ ;  $w^{-1} = [\sigma^2(F_o^2) + (Ap)^2 + Bp]$ , where  $p = [\max(F_o^2, 0) + 2F_c^2] / 3$ .

References:

<sup>a</sup> G. M. Sheldrick, *Acta Cryst.*, 2008, **A64**, 112–122.

<sup>b</sup> G. M. Sheldrick, *Acta Cryst.*, 2015, **A71**, 3–8.

<sup>c</sup> G. M. Sheldrick, *Acta Cryst.*, 2015, **C71**, 3–8.

<sup>d</sup> O. V. Dolomanov, L. J. Bourhis, R. J. Gildea, J. A. K. Howard and H. Puschmann, *J. Appl. Cryst.*, 2009, **42**, 339-341.

<sup>e</sup> A. L. Spek, *J. Appl. Cryst.*, 2003, **36**, 7–13.

## 9. The NMR study of substrates with G3.

We performed NMR spectra analysis to probe the interaction between chiral guanidine and two substrates separately. In **Fig. S1**, the chemical shift of diphenylmethyl aliphatic H of **G3** shift from 6.225 ppm to 6.231 ppm when mixing with azonaphthalene (**B1**). In **Fig. S2**, the results showed that the  $\alpha$ -H ( $\delta=3.15$  ppm) of  $\beta$ -ketoester was disappeared when mixing with the catalyst **G3**. These results manifested that the chiral guanidine might playing two roles in this reaction, which promoting enolization of  $\beta$ -ketoester by guanidine group and bonding with the azonaphthalene by hydrogen bond of amide group.

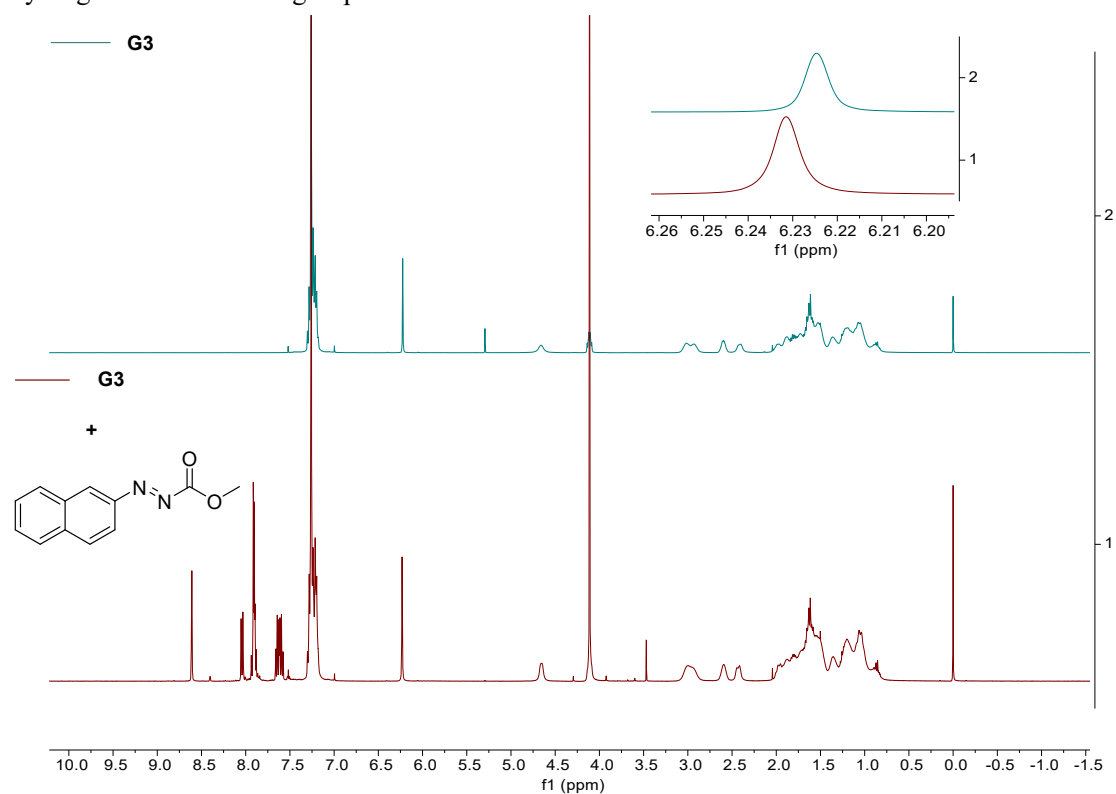

**Fig. S1**

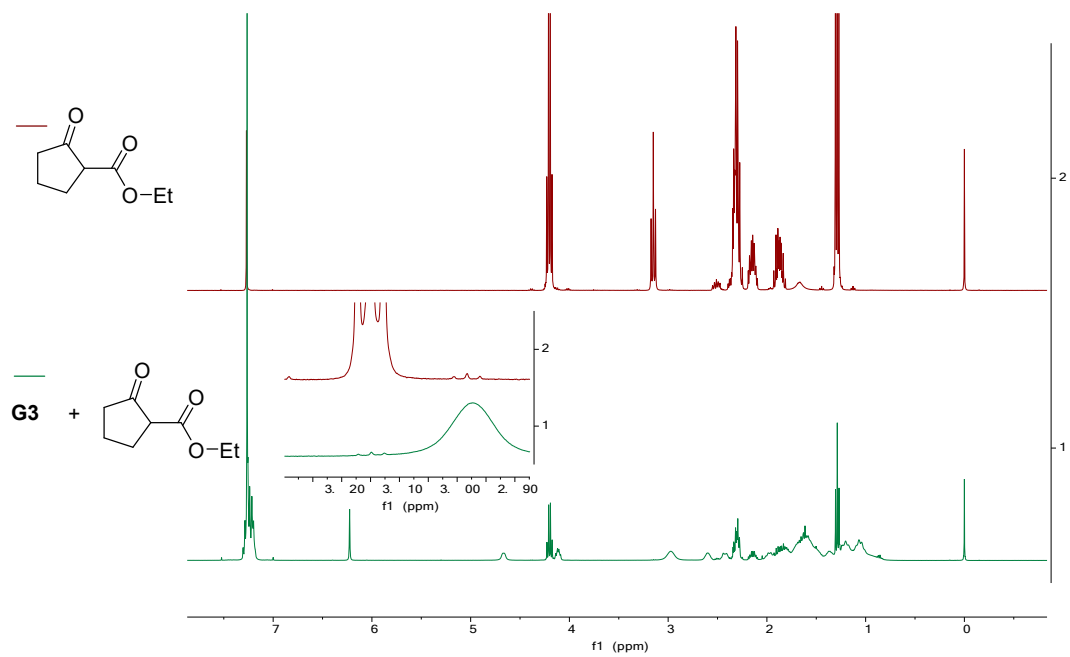

**Fig. S2**

## 10. Spectral characterization data for products

### Tert-butyl (7aR,12aR)-7a-hydroxy-7-((methoxycarbonyl)amino)-7a,12-dihydrobenzo[e]indeno[1,2-b]indole-12a(7H)-carboxylate (C1):

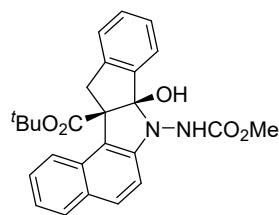

White solid, 97% yield, 91% ee, >19:1 dr, m.p. 118-123 °C,  $[\alpha]_D^{20} = -448.4$  (c = 1.65, in CH<sub>2</sub>Cl<sub>2</sub>).

SFC Daicel Chiralpak OD-3, CO<sub>2</sub>/MeOH = 90/10, 1.5 mL/min,  $\lambda = 240$  nm,  $t_1 = 4.00$  min,  $t_2 = 5.52$  min.

<sup>1</sup>H NMR (400 MHz, Benzene-*d*<sub>6</sub>)  $\delta$  7.57 (d,  $J = 7.2$  Hz, 1H), 7.33 (m, 2H), 7.17 (d,  $J = 8.3$  Hz, 1H), 7.06 (t,  $J = 7.5$  Hz, 1H), 6.86 (s, 1H), 6.77 (s, 2H), 6.66 – 6.59 (m, 1H), 6.41 – 6.24 (m, 1H), 5.71 (s, 1H), 4.70 (s, 1H), 4.35 (d,  $J = 15.9$  Hz, 1H), 3.08 (s, 3H), 2.90 (d,  $J = 16.4$  Hz, 1H), 0.92 (s, 9H).

<sup>13</sup>C NMR (101 MHz, Benzene-*d*<sub>6</sub>)  $\delta$  170.3, 158.8, 145.4, 142.3, 140.2, 130.4, 129.9, 129.7, 129.6, 127.3, 127.0, 125.5, 124.6, 122.9, 122.3, 120.5, 110.5, 108.9, 81.9, 65.5, 52.9, 41.4, 30.1, 27.8.

HRMS (ESI)  $m/z$ :  $[M + Na]^+$  Calculated for [C<sub>26</sub>H<sub>26</sub>N<sub>2</sub>O<sub>5</sub>Na<sup>+</sup>]: 469.1734 found 469.1736.

IR (neat) 3302, 2977, 1714, 1627, 1518, 1249, 1149, 928, 842, 811, 733, 702 cm<sup>-1</sup>.

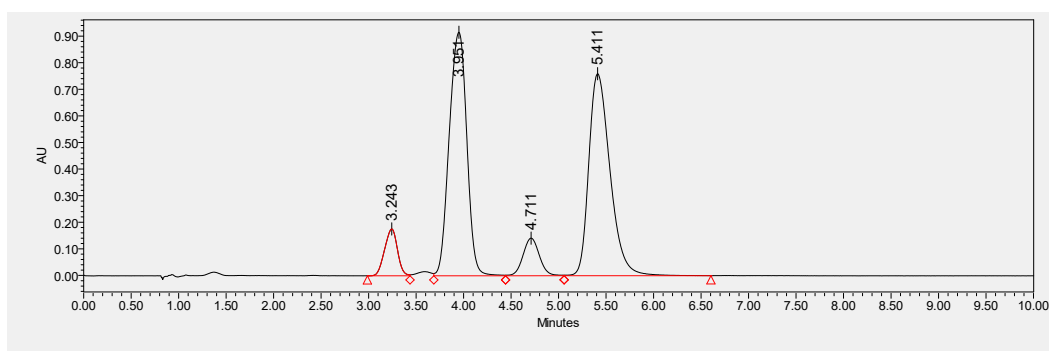

|   | Retention Time | Area     | % Area |
|---|----------------|----------|--------|
| 1 | 3.243          | 1658752  | 6.17   |
| 2 | 3.951          | 11748415 | 43.69  |
| 3 | 4.711          | 1691511  | 6.29   |
| 4 | 5.411          | 11794216 | 43.86  |

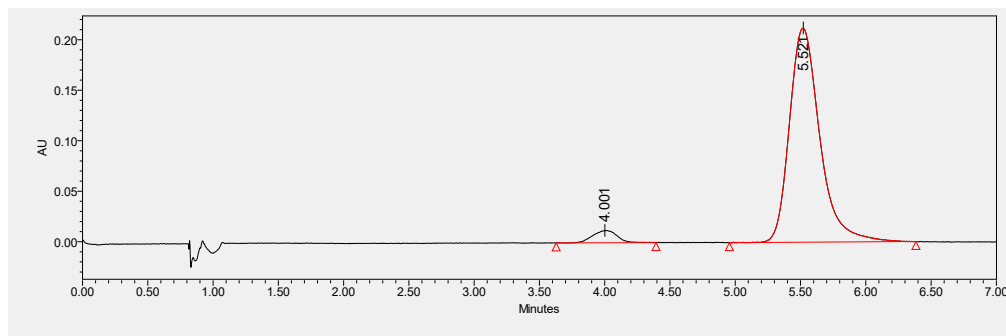

|   | Retention Time | Area    | % Area |
|---|----------------|---------|--------|
| 1 | 4.001          | 157915  | 4.41   |
| 2 | 5.521          | 3421493 | 95.59  |

**Tert-butyl (7a*R*,12a*R*)-11-bromo-7a-hydroxy-7-((methoxycarbonyl)amino)-7a,12-dihydrobenzo[*e*]indeno[1,2-*b*]indole-12a(7*H*)-carboxylate (C2):**

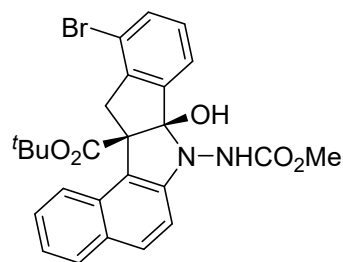

White solid, 77% yield, 86% ee, >19:1 dr, m.p. 122-123 °C,  $[\alpha]_D^{20} = -336.2$  ( $c = 0.81$ , in  $\text{CH}_2\text{Cl}_2$ ).

SFC Daicel Chiralpak IB-3,  $\text{CO}_2/\text{MeOH} = 85/15$ , 1.5 mL/min,  $\lambda = 240$  nm,  $t_1 = 3.20$  min,  $t_2 = 3.55$  min.

$^1\text{H NMR}$  (400 MHz, Benzene- $d_6$ )  $\delta$  7.49 (d,  $J = 7.2$  Hz, 1H), 7.33 (d,  $J = 8.0$  Hz, 1H), 7.16 (m, 2H), 7.01 (d,  $J = 7.4$  Hz, 1H), 6.93 (d,  $J = 6.9$  Hz, 1H), 6.83 (s, 1H), 6.42 (t,  $J = 7.2$  Hz, 1H), 6.30 (d,  $J = 7.5$  Hz, 1H), 5.53 (s, 1H), 4.77 (s, 1H), 4.54 (d,  $J = 15.7$  Hz, 1H), 3.04 (m, 4H), 0.90 (s, 9H).

$^{13}\text{C NMR}$  (101 MHz, Benzene- $d_6$ )  $\delta$  169.8, 158.9, 145.2, 142.8, 142.4, 132.7, 130.5, 130.4, 130.1, 129.5, 129.0, 127.6, 123.3, 123.1, 122.3, 120.7, 120.1, 110.2, 109.1, 82.0, 65.1, 52.9, 43.2, 30.2, 27.7.

HRMS (ESI)  $m/z$ :  $[\text{M} + \text{Na}]^+$  Calculated for  $[\text{C}_{26}\text{H}_{25}^{79}\text{BrN}_2\text{O}_5\text{Na}^+]$ : 547.0839 found 547.0839.

HRMS (ESI)  $m/z$ :  $[\text{M} + \text{Na}]^+$  Calculated for  $[\text{C}_{26}\text{H}_{25}^{81}\text{BrN}_2\text{O}_5\text{Na}^+]$ : 549.0819 found 549.0819.

IR (neat) 3299, 2976, 1722, 1628, 1578, 1519, 1368, 1255, 1175, 1061, 783, 738  $\text{cm}^{-1}$ .

Racemate: 15:1 dr determined by isolate yield. The HPLC of the cis-isomer as below:

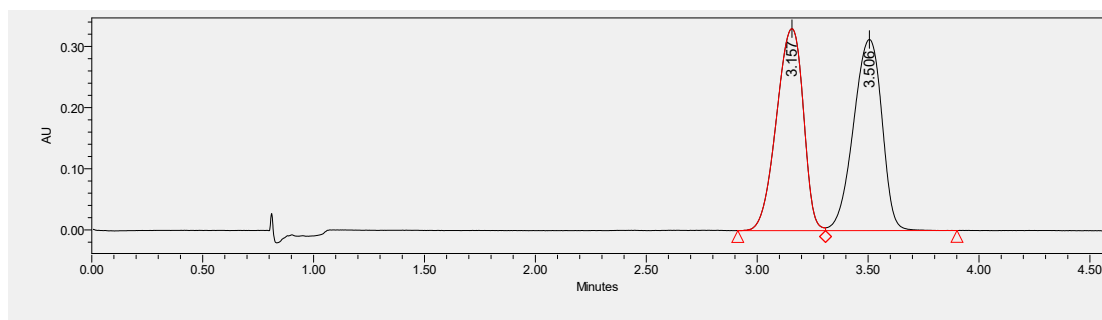

|   | Retention Time | Area    | % Area |
|---|----------------|---------|--------|
| 1 | 3.157          | 2782691 | 49.97  |
| 2 | 3.506          | 2785893 | 50.03  |

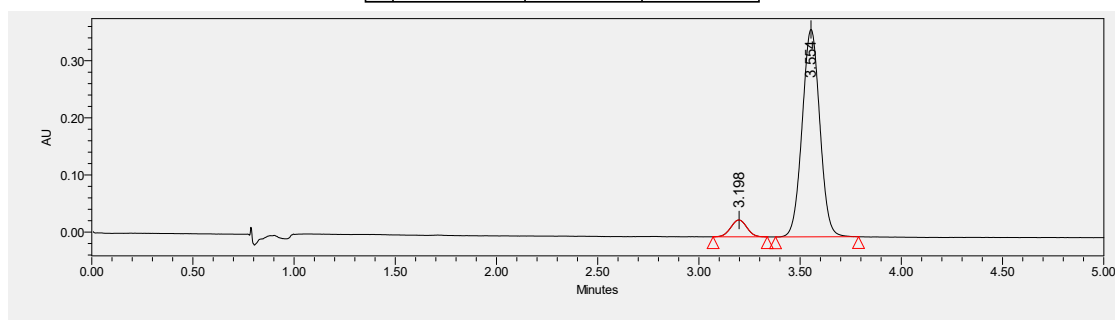

|   | Retention Time | Area    | % Area |
|---|----------------|---------|--------|
| 1 | 3.198          | 162472  | 6.87   |
| 2 | 3.554          | 2201297 | 93.13  |

**Tert-butyl (7a*R*,12a*R*)-7a-hydroxy-7-((methoxycarbonyl)amino)-11-methyl-7a,12-dihydrobenzo[*e*]indeno[1,2-*b*]indole-12a(7*H*)-carboxylate (C3):**

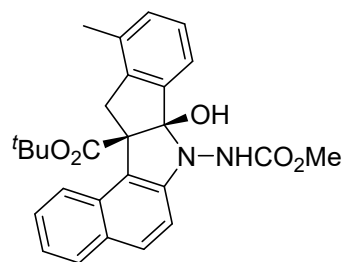

White solid, 99% yield, 88% ee, >19:1 dr, m.p. 120-122 °C,  $[\alpha]_D^{23} = -618.5$  ( $c = 0.80$ , in  $\text{CH}_2\text{Cl}_2$ ).

SFC Daicel Chiralpak IA-3,  $\text{CO}_2/\text{MeOH} = 85/15$ , 1.5 mL/min,  $\lambda = 240$  nm,  $t_1 = 11.81$  min,  $t_2 = 14.58$  min.

$^1\text{H NMR}$  (400 MHz, Benzene- $d_6$ )  $\delta$  7.63 (d,  $J = 7.5$  Hz, 1H), 7.35 (d,  $J = 8.1$  Hz, 1H), 7.24 (d,  $J = 7.4$  Hz, 1H), 7.19 (d,  $J = 8.5$  Hz, 1H), 7.07 (t,  $J = 7.4$  Hz, 1H), 6.86 (s, 1H), 6.82 – 6.76 (m, 1H), 6.62 (d,  $J = 6.7$  Hz, 1H), 6.36 (d,  $J = 8.0$  Hz, 1H), 5.64 (s, 1H), 4.66 (s, 1H), 4.34 (d,  $J = 16.9$  Hz, 1H), 3.08 (s, 3H), 2.88 (d,  $J = 16.9$  Hz, 1H), 1.56 (s, 3H), 0.93 (s, 9H).

$^{13}\text{C NMR}$  (101 MHz, Benzene- $d_6$ )  $\delta$  170.4, 145.5, 141.0, 140.0, 134.9, 130.5, 130.4, 129.9, 129.6, 127.5, 127.4, 122.9, 122.3, 122.0, 120.7, 110.4, 109.0, 81.8, 65.3, 52.8, 40.4, 30.2, 27.8, 18.4.

HRMS (ESI)  $m/z$ :  $[\text{M} + \text{Na}]^+$  Calculated for  $[\text{C}_{27}\text{H}_{28}\text{N}_2\text{O}_5\text{Na}]^+$ : 483.1890 found 483.1891.

IR (neat) 3303, 2976, 1720, 1627, 1519, 1368, 1254, 1150, 1056, 848, 739  $\text{cm}^{-1}$ .

Racemate: 3.2:1 dr determined by isolate yield. The HPLC of the cis-isomer as below:

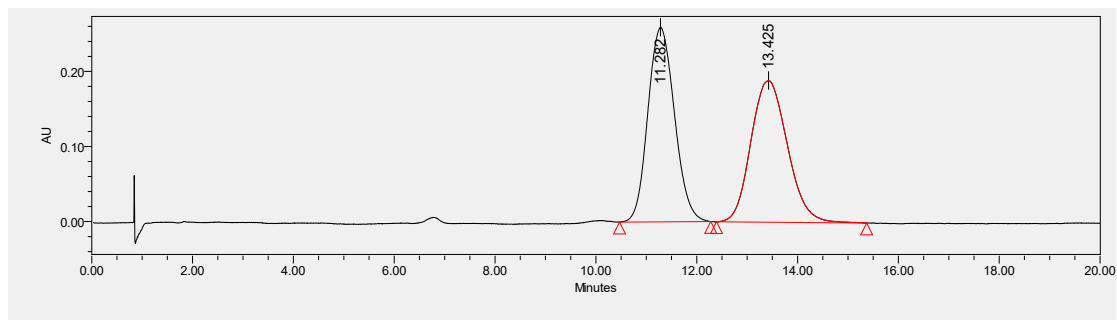

|   | Retention Time | Area    | % Area |
|---|----------------|---------|--------|
| 1 | 11.282         | 9480547 | 50.01  |
| 2 | 13.425         | 9476135 | 49.99  |

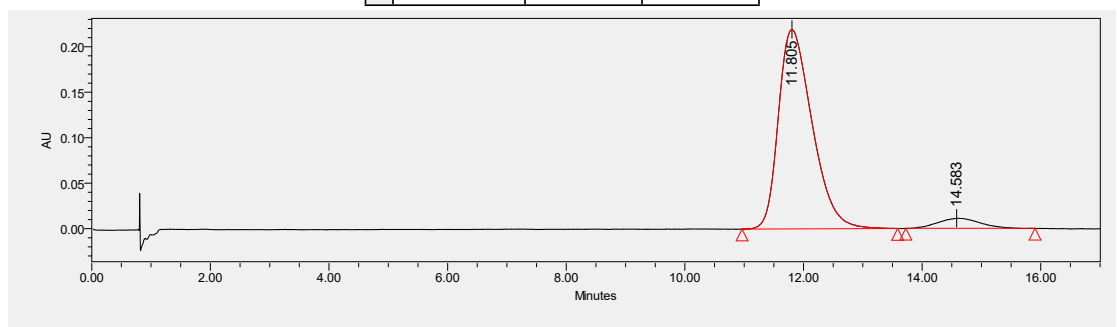

|   | Retention Time | Area    | % Area |
|---|----------------|---------|--------|
| 1 | 11.805         | 8638724 | 94.14  |
| 2 | 14.583         | 537299  | 5.86   |



**Tert-butyl (7a*R*,12a*R*)-7a-hydroxy-7-((methoxycarbonyl)amino)-10-phenyl-7a,12-dihydrobenzo[*e*]indeno[1,2-*b*]indole-12a(7*H*)-carboxylate (C4):**

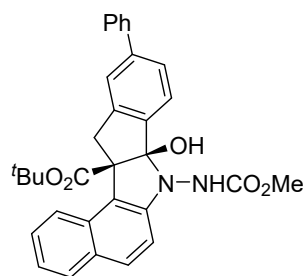

White solid, 59% yield, 81% ee, >19:1 dr, m.p. 130-133 °C,  $[\alpha]_D^{25} = -717.8$  ( $c = 0.57$ , in  $\text{CH}_2\text{Cl}_2$ ).

SFC Daicel Chiralpak IB-3,  $\text{CO}_2/\text{MeOH} = 85/15$ , 1.5 mL/min,  $\lambda = 240$  nm,  $t_1 = 6.85$  min,  $t_2 = 12.17$  min.

$^1\text{H NMR}$  (400 MHz, Benzene- $d_6$ )  $\delta$  7.92 (d,  $J = 7.0$  Hz, 1H), 7.72 – 7.61 (m, 2H), 7.50 (d,  $J = 8.4$  Hz, 1H), 7.44 – 7.34 (m, 4H), 7.21 (q,  $J = 6.4, 5.5$  Hz, 3H), 7.13 (m, 2H), 6.70 (d,  $J = 8.0$  Hz, 1H), 6.03 (s, 1H), 5.01 (s, 1H), 4.72 (d,  $J = 16.4$  Hz, 1H), 3.42 (s, 3H), 3.27 (d,  $J = 16.5$  Hz, 1H), 1.25 (s, 9H).

$^{13}\text{C NMR}$  (101 MHz, Benzene- $d_6$ )  $\delta$  170.3, 158.8, 145.4, 143.3, 143.0, 141.5, 139.2, 130.5, 130.4, 130.0, 129.6, 129.0, 127.6, 127.4, 126.4, 124.9, 124.4, 123.0, 122.3, 120.6, 110.4, 81.9, 65.8, 52.8, 41.3, 30.2, 27.8.

HRMS (ESI)  $m/z$ :  $[\text{M} + \text{Na}]^+$  Calculated for  $[\text{C}_{32}\text{H}_{30}\text{N}_2\text{O}_5\text{Na}]^+$ : 545.2047 found 545.2049.

IR (neat) 3313, 2977, 1718, 1600, 1368, 1251, 1150, 842, 765, 736  $\text{cm}^{-1}$ .

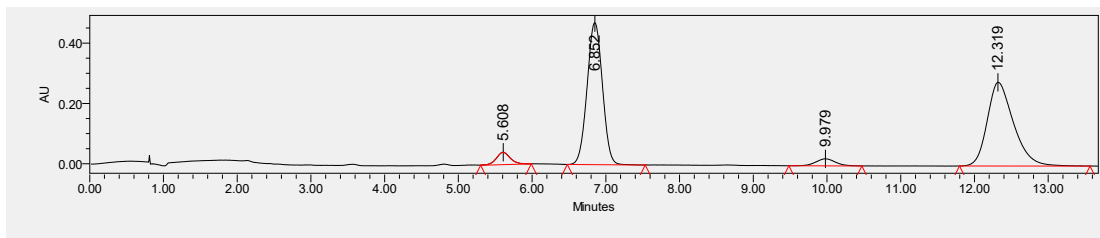

|   | Retention Time | Area    | % Area |
|---|----------------|---------|--------|
| 1 | 5.608          | 533712  | 3.64   |
| 2 | 6.852          | 6810955 | 46.43  |
| 3 | 9.979          | 442728  | 3.02   |
| 4 | 12.319         | 6881453 | 46.91  |

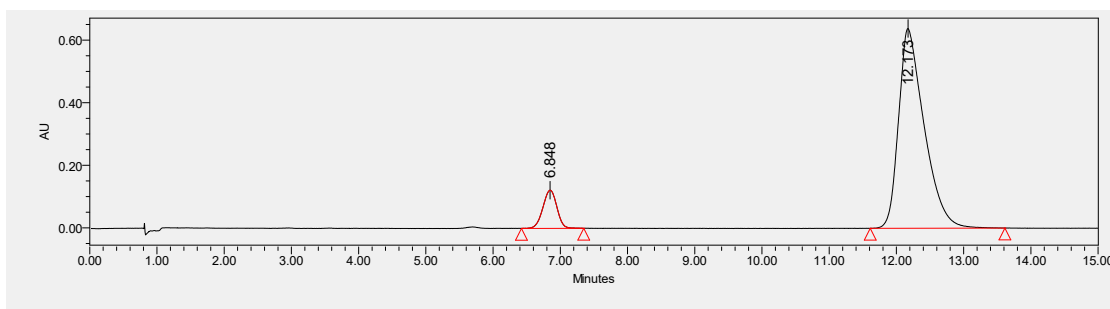

|   | Retention Time | Area     | % Area |
|---|----------------|----------|--------|
| 1 | 6.848          | 1768701  | 9.52   |
| 2 | 12.173         | 16814574 | 90.48  |

**Tert-butyl (7aR, 12aR)-10-chloro-7a-hydroxy-7-((methoxycarbonyl)amino)-7a,12-dihydrobenzo[e]indeno[1,2-b]indole-12a(7H)-carboxylate (C5):**

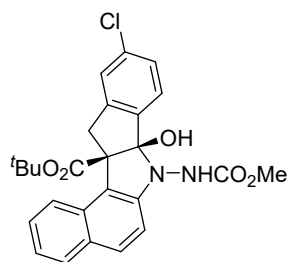

White solid, 90% yield, 89% ee, >19:1 dr, m.p. 118-121 °C,  $[\alpha]_D^{20} = -400.1$  ( $c = 0.86$ , in  $\text{CH}_2\text{Cl}_2$ ).

SFC Daicel Chiralpak IB-3,  $\text{CO}_2/\text{MeOH} = 85/15$ , 1.5 mL/min,  $\lambda = 240$  nm,  $t_1 = 3.04$  min,  $t_2 = 4.53$  min.

$^1\text{H NMR}$  (400 MHz, Benzene- $d_6$ )  $\delta$  7.79 (d,  $J = 6.5$  Hz, 1H), 7.63 (d,  $J = 8.0$  Hz, 1H), 7.48 (d,  $J = 8.3$  Hz, 1H), 7.36 (m, 2H), 7.16 (s, 1H), 7.05 (d,  $J = 6.9$  Hz, 1H), 6.87 (s, 1H), 6.65 (d,  $J = 7.5$  Hz, 1H), 5.97 (s, 1H), 5.00 (s, 1H), 4.45 (d,  $J = 14.8$  Hz, 1H), 3.38 (s, 3H), 2.97 (d,  $J = 16.6$  Hz, 1H), 1.21 (s, 9H).

$^{13}\text{C NMR}$  (101 MHz, Benzene- $d_6$ )  $\delta$  170.0, 158.8, 145.3, 144.3, 138.8, 135.6, 130.4, 130.3, 130.1, 129.6, 127.4, 125.7, 125.6, 123.1, 122.2, 120.2, 110.3, 108.1, 82.0, 65.7, 52.5, 40.9, 30.2, 27.7.

HRMS (ESI)  $m/z$ :  $[\text{M} + \text{Na}]^+$  Calculated for  $[\text{C}_{26}\text{H}_{25}^{35}\text{ClN}_2\text{O}_5\text{Na}^+]$ : 503.1344 found 503.1344.

HRMS (ESI)  $m/z$ :  $[\text{M} + \text{Na}]^+$  Calculated for  $[\text{C}_{26}\text{H}_{25}^{37}\text{ClN}_2\text{O}_5\text{Na}^+]$ : 505.1315 found 505.1315.

IR (neat) 3298, 2977, 1720, 1628, 1600, 1519, 1475, 1368, 1252, 1150, 812, 701  $\text{cm}^{-1}$ .

Racemate: 12.5:1 dr determined by isolate yield. The HPLC of the cis-isomer as below:

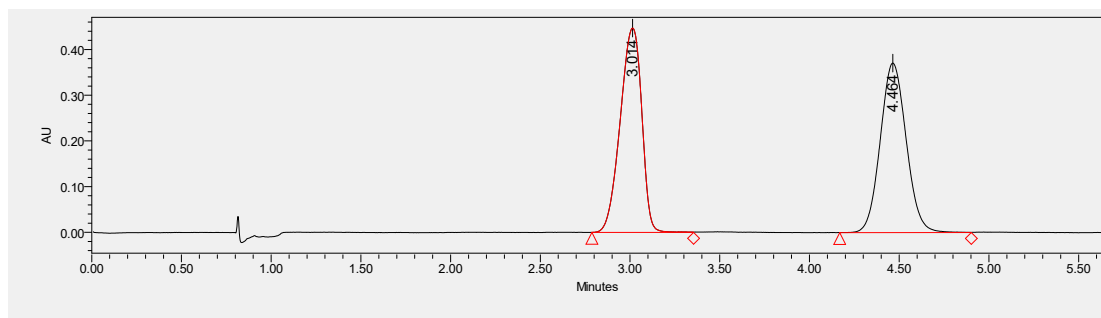

|   | Retention Time | Area    | % Area |
|---|----------------|---------|--------|
| 1 | 3.014          | 3730623 | 50.02  |
| 2 | 4.464          | 3727718 | 49.98  |

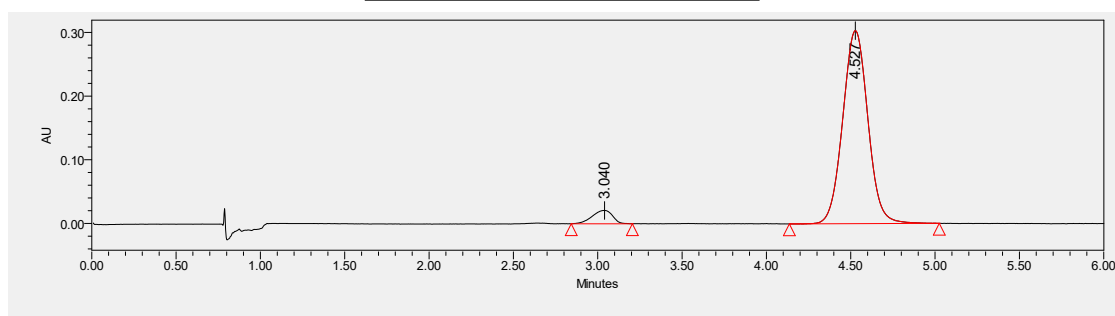

|   | Retention Time | Area    | % Area |
|---|----------------|---------|--------|
| 1 | 3.040          | 176534  | 5.32   |
| 2 | 4.527          | 3139221 | 94.68  |

**Tert-butyl (7a*R*,12a*R*)-7a-hydroxy-10-methoxy-7-((methoxycarbonyl)amino)-7a,12-dihydrobenzo[*e*]indeno[1,2-*b*]indole-12a(7*H*)-carboxylate (C6):**

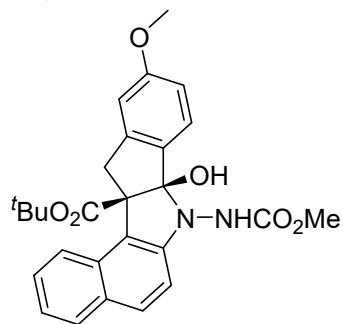

White solid, 99% yield, 84% ee, >19:1 dr, m.p. 120-121 °C,  $[\alpha]^{25}_D = -733.3$  ( $c = 0.44$ , in  $\text{CH}_2\text{Cl}_2$ ).

SFC Daicel Chiralpak IB-3,  $\text{CO}_2/\text{MeOH} = 90/10$ , 1.5 mL/min,  $\lambda = 240$  nm,  $t_1 = 5.47$  min,  $t_2 = 7.39$  min.

$^1\text{H NMR}$  (400 MHz, Benzene- $d_6$ )  $\delta$  7.92 (d,  $J = 6.8$  Hz, 1H), 7.64 (d,  $J = 8.0$  Hz, 1H), 7.55 (d,  $J = 8.2$  Hz, 1H), 7.48 (d,  $J = 8.0$  Hz, 1H), 7.37 (t,  $J = 7.5$  Hz, 1H), 7.16 (s, 1H), 6.79 (d,  $J = 6.7$  Hz, 1H), 6.69 (d,  $J = 8.2$  Hz, 1H), 6.48 (s, 1H), 6.04 (s, 1H), 4.90 (s, 1H),

4.64 (d,  $J = 15.4$  Hz, 1H), 3.42 (s, 3H), 3.25 (s, 4H), 1.23 (s, 9H).

$^{13}\text{C NMR}$  (101 MHz, Benzene- $d_6$ )  $\delta$  170.4, 161.6, 158.7, 145.5, 144.1, 130.4, 130.4, 130.0, 129.6, 127.3, 125.6, 122.9, 122.3, 120.6, 114.4, 110.6, 109.5, 108.5, 81.8, 65.8, 54.9, 52.7, 41.2, 30.1, 27.8.

HRMS (ESI)  $m/z$ :  $[\text{M} + \text{Na}]^+$  Calculated for  $[\text{C}_{27}\text{H}_{28}\text{N}_2\text{O}_6\text{Na}]^+$ : 499.1840 found 499.1840.

IR (neat) 3291, 2975, 1720, 1608, 1497, 1251, 1149, 834, 737, 702  $\text{cm}^{-1}$ .

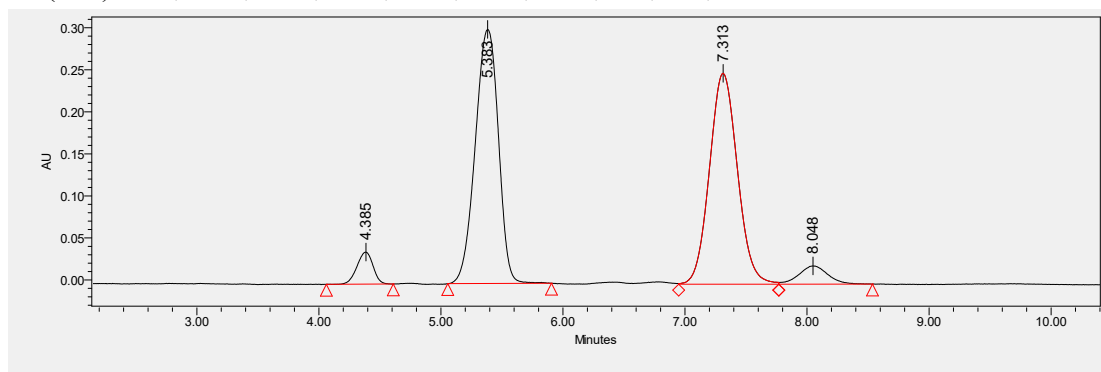

|   | Retention Time | Area    | % Area |
|---|----------------|---------|--------|
| 1 | 4.385          | 350469  | 4.04   |
| 2 | 5.383          | 3978451 | 45.85  |
| 3 | 7.313          | 3990265 | 45.99  |
| 4 | 8.048          | 357124  | 4.12   |

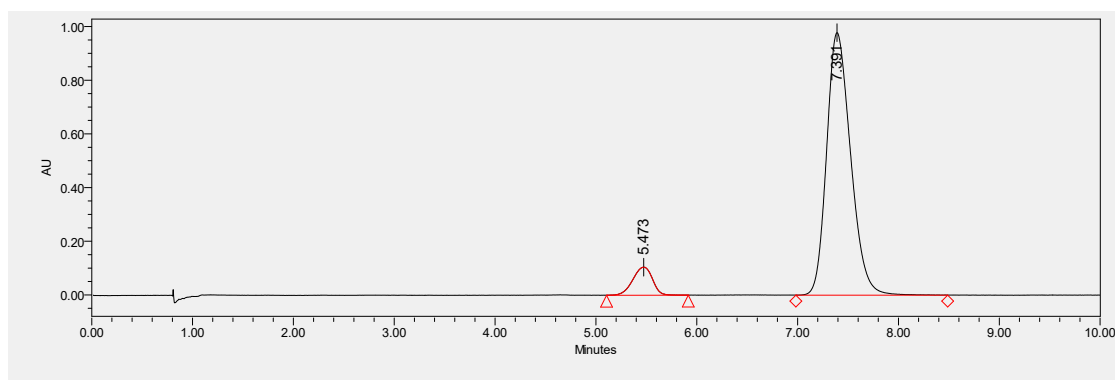

|   | Retention Time | Area     | % Area |
|---|----------------|----------|--------|
| 1 | 5.473          | 1423042  | 8.07   |
| 2 | 7.391          | 16203427 | 91.93  |

**Tert-butyl (7*R*,12*aR*)-7*a*-hydroxy-9,10-dimethoxy-7-((methoxycarbonyl)amino)-7*a*,12-dihydrobenzo[*e*]indeno[1,2-*b*]indole-12*a*(7*H*)-carboxylate (C7):**

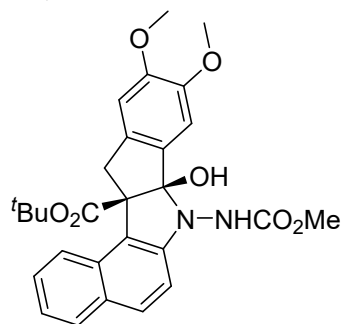

White solid, 99% yield, 79% ee, >19:1 dr, m.p. 126-128 °C,  $[\alpha]_D^{25} = -512.2$  ( $c = 0.80$ , in  $\text{CH}_2\text{Cl}_2$ ).

SFC Daicel Chiralpak IC-3,  $\text{CO}_2/\text{MeOH} = 85/15$ , 1.5 mL/min,  $\lambda = 240$  nm,  $t_1 = 4.62$  min,  $t_2 = 22.64$  min.

$^1\text{H NMR}$  (600 MHz, Benzene- $d_6$ )  $\delta$  7.94 (d,  $J = 6.5$  Hz, 1H), 7.65 (d,  $J = 7.6$  Hz, 1H), 7.51 (d,  $J = 8.0$  Hz, 1H), 7.38 (t,  $J = 7.3$  Hz, 1H), 7.09 (m, 2H), 6.80 (d,  $J = 8.1$  Hz, 1H), 6.56 (s, 1H), 6.31 (s, 1H), 4.98 (s, 1H), 4.68 (d,  $J = 16.0$  Hz, 1H), 3.38 (d,  $J = 26.0$  Hz,

6H), 3.17 (m, 4H), 1.25 (s, 9H).

$^{13}\text{C NMR}$  (151 MHz, Benzene- $d_6$ )  $\delta$  170.3, 158.7, 151.4, 149.2, 145.4, 133.9, 131.3, 130.2, 129.7, 129.4, 128.3, 127.1, 122.6, 122.0, 120.6, 110.4, 108.9, 107.7, 81.5, 65.8, 55.3, 55.1, 52.4, 40.9, 29.9, 27.5.

HRMS (ESI)  $m/z$ :  $[\text{M} + \text{Na}]^+$  Calculated for  $[\text{C}_{28}\text{H}_{30}\text{N}_2\text{O}_7\text{Na}]^+$ : 529.1945 found 529.1946.

IR (neat) 3293, 2960, 1721, 1627, 1504, 1366, 1247, 1149, 1118, 811, 735  $\text{cm}^{-1}$ .

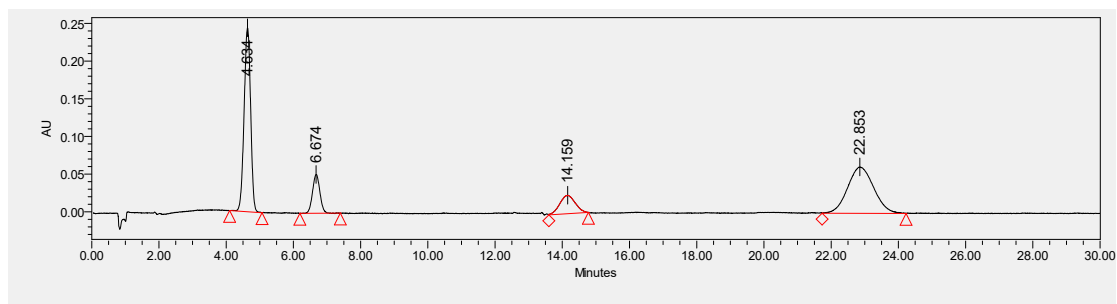

|   | Retention Time | Area    | % Area |
|---|----------------|---------|--------|
| 1 | 4.634          | 3292552 | 40.27  |
| 2 | 6.674          | 784462  | 9.59   |
| 3 | 14.159         | 779565  | 9.53   |
| 4 | 22.853         | 3319289 | 40.60  |

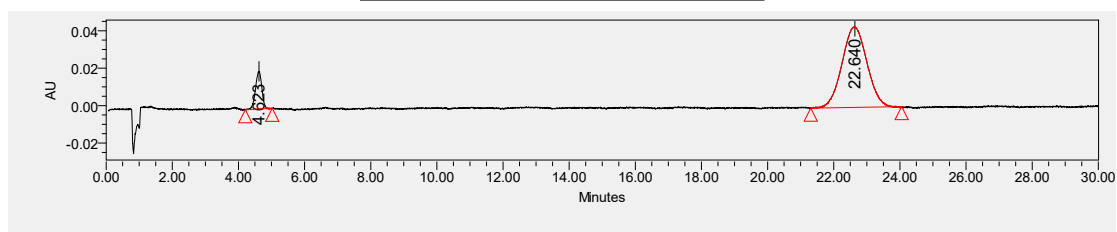

|   | Retention Time | Area    | % Area |
|---|----------------|---------|--------|
| 1 | 4.623          | 267086  | 10.63  |
| 2 | 22.640         | 2245161 | 89.37  |

**Tert-butyl (7a*R*,12a*R*)-9-fluoro-7a-hydroxy-7-((methoxycarbonyl)amino)-7a,12-dihydrobenzo[*e*]indeno[1,2-*b*]indole-12a(7*H*)-carboxylate (C8):**

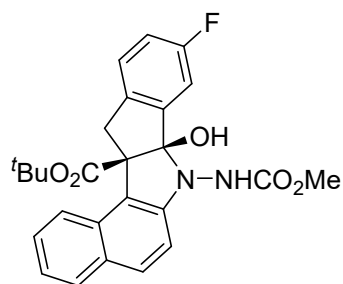

White solid, 91% yield, 92% ee, >19:1 dr, m.p. 108-110 °C,  $[\alpha]_D^{20} = -406.3$  (c = 0.84, in CH<sub>2</sub>Cl<sub>2</sub>).

SFC Daicel Chiralpak IB-3, CO<sub>2</sub>/MeOH = 85/15, 1.5 mL/min,  $\lambda = 240$  nm,  $t_1 = 2.22$  min,  $t_2 = 2.64$  min.

<sup>1</sup>H NMR (600 MHz, Benzene-*d*<sub>6</sub>)  $\delta$  7.81 (d, J = 6.7 Hz, 1H), 7.63 (d, J = 8.0 Hz, 1H), 7.48 (d, J = 8.4 Hz, 1H), 7.41 – 7.31 (m, 2H), 7.17 (s, 1H), 6.75 (t, J = 7.5 Hz, 1H), 6.66 (s, 1H), 6.63 – 6.56 (m, 1H), 5.85 (s, 1H), 5.12 (s, 1H), 4.53 (d, J = 14.7 Hz, 1H), 3.33 (s, 3H), 3.02 (d, J = 16.3 Hz, 1H), 1.22 (s, 9H).

<sup>13</sup>C NMR (151 MHz, Benzene-*d*<sub>6</sub>)  $\delta$  170.2, 163.5, 161.9, 159.0, 145.3, 142.5, 137.5, 130.5, 130.4, 130.0, 129.6, 127.4, 126.7, 126.7, 123.0, 122.3, 120.4, 116.9, 116.8, 111.4, 111.3, 110.3, 108.2, 82.0, 66.3, 52.8, 40.7, 27.8.

<sup>19</sup>F NMR (565 MHz, Benzene-*d*<sub>6</sub>)  $\delta$  -116.01.

HRMS (ESI) m/z: [M + Na]<sup>+</sup> Calculated for [C<sub>26</sub>H<sub>25</sub>FN<sub>2</sub>O<sub>5</sub>Na<sup>+</sup>]: 487.1460 found 487.1460.

IR (neat) 3302, 2977, 1724, 1628, 1520, 1491, 1369, 1290, 1151, 965, 868, 843, 778, 744 cm<sup>-1</sup>.

Racemate: 6:1 dr determined by isolate yield. The HPLC of the cis-isomer as below:

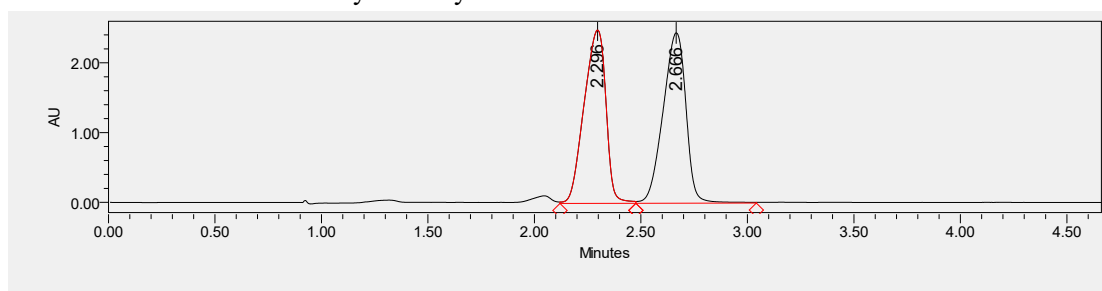

|   | Retention Time | Area     | % Area |
|---|----------------|----------|--------|
| 1 | 2.296          | 17688932 | 49.18  |
| 2 | 2.666          | 18282137 | 50.82  |

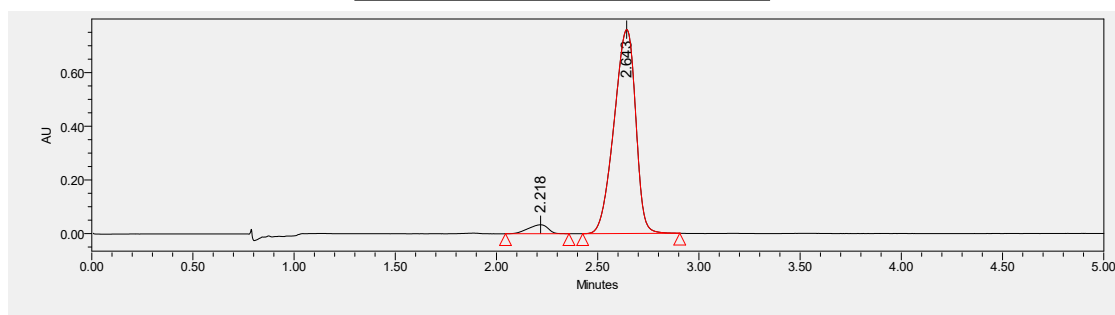

|   | Retention Time | Area    | % Area |
|---|----------------|---------|--------|
| 1 | 2.218          | 227114  | 3.88   |
| 2 | 2.643          | 5628411 | 96.12  |

**Tert-butyl (7a*R*,12a*R*)-9-chloro-7a-hydroxy-7-((methoxycarbonyl)amino)-7a,12-dihydrobenzo[*e*]indeno[1,2-*b*]indole-12a(7*H*)-carboxylate (C9):**

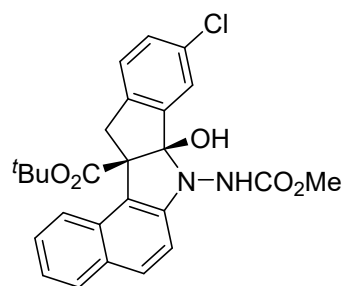

White solid, 76% yield, 86% ee, >19:1 dr, m.p. 130-131 °C,  $[\alpha]_D^{25} = -561.9$  ( $c = 1.07$ , in  $\text{CH}_2\text{Cl}_2$ ).

SFC Daicel Chiralpak IB-3,  $\text{CO}_2/\text{MeOH} = 85/15$ , 1.5 mL/min,  $\lambda = 240$  nm,  $t_1 = 2.69$  min,  $t_2 = 3.19$  min.

$^1\text{H NMR}$  (600 MHz, Benzene- $d_6$ )  $\delta$  7.52 – 7.46 (m, 1H), 7.42 (s, 1H), 7.33 (d,  $J = 7.9$  Hz, 1H), 7.18 (d,  $J = 8.4$  Hz, 1H), 7.05 (t,  $J = 7.4$  Hz, 1H), 6.87 (s, 1H), 6.74 (d,  $J = 7.9$  Hz, 1H), 6.32 (d,  $J = 6.8$  Hz, 2H), 5.58 (s, 1H), 4.77 (s, 1H), 4.21 (d,  $J = 15.5$  Hz, 1H), 3.02

(s, 3H), 2.67 (d,  $J = 16.6$  Hz, 1H), 0.91 (s, 9H).

$^{13}\text{C NMR}$  (151 MHz, Benzene- $d_6$ )  $\delta$  170.1, 159.0, 145.3, 142.6, 140.7, 132.9, 130.4, 130.4, 130.1, 129.8, 129.7, 127.4, 126.8, 124.7, 123.1, 122.3, 120.3, 110.3, 108.3, 82.1, 66.0, 52.9, 40.9, 27.8.

HRMS (ESI)  $m/z$ :  $[\text{M} + \text{Na}]^+$  Calculated for  $[\text{C}_{26}\text{H}_{25}^{35}\text{ClN}_2\text{O}_5\text{Na}^+]$ : 503.1344 found 503.1343.

HRMS (ESI)  $m/z$ :  $[\text{M} + \text{Na}]^+$  Calculated for  $[\text{C}_{26}\text{H}_{25}^{37}\text{ClN}_2\text{O}_5\text{Na}^+]$ : 505.1315 found 505.1317.

IR (neat) 3307, 2977, 1722, 1628, 1519, 1368, 1255, 1152, 844, 690  $\text{cm}^{-1}$ .

Racemate: 16:1 dr determined by isolate yield. The HPLC of the cis-isomer as below:

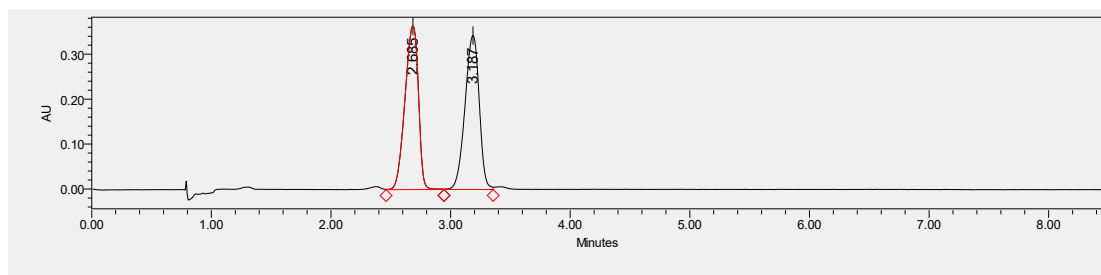

|   | Retention Time | Area    | % Area |
|---|----------------|---------|--------|
| 1 | 2.685          | 2833466 | 50.03  |
| 2 | 3.187          | 2830201 | 49.97  |

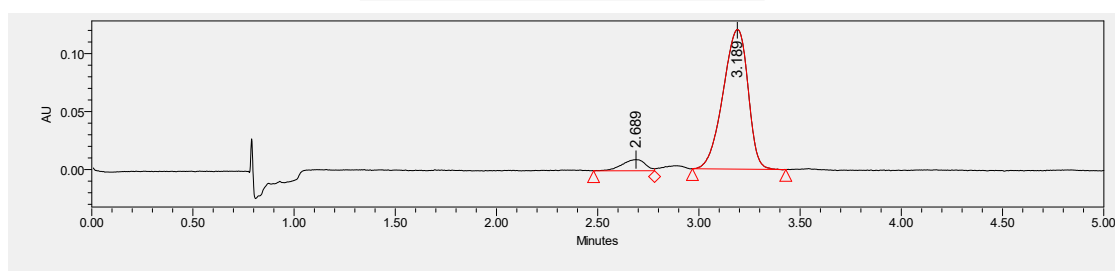

|   | Retention Time | Area    | % Area |
|---|----------------|---------|--------|
| 1 | 2.689          | 77543   | 7.00   |
| 2 | 3.189          | 1030138 | 93.00  |

**Tert-butyl (7a*R*,12a*R*)-9-bromo-7a-hydroxy-7-((methoxycarbonyl)amino)-7a,12-dihydrobenzo[*e*]indeno[1,2-*b*]indole-12a(7*H*)-carboxylate (C10):**

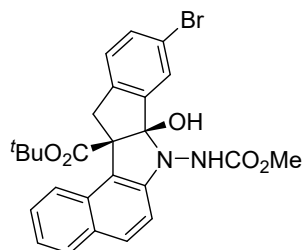

White solid, 93% yield, 92% ee, >19:1 dr, m.p. 129-133 °C,  $[\alpha]_D^{20} = -389.6$  ( $c = 0.98$ , in  $\text{CH}_2\text{Cl}_2$ ).

**SFC** Daicel Chiralpak IB-3,  $\text{CO}_2/\text{MeOH} = 85/15$ , 1.5 mL/min,  $\lambda = 240$  nm,  $t_1 = 2.98$  min,  $t_2 = 3.52$  min.

**$^1\text{H}$  NMR** (400 MHz, Benzene- $d_6$ )  $\delta$  7.89 (s, 1H), 7.79 (d,  $J = 7.7$  Hz, 1H), 7.64 (d,  $J = 8.2$  Hz, 1H), 7.49 (d,  $J = 8.6$  Hz, 1H), 7.35 (t,  $J = 7.4$  Hz, 1H), 7.18 (m, 2H), 6.59 (m, 2H), 5.80 (s, 1H), 5.09 (s, 1H), 4.49 (d,  $J = 16.3$  Hz, 1H), 3.32 (s, 3H), 2.94 (d,  $J = 16.8$  Hz, 1H), 1.21 (s, 9H).

**$^{13}\text{C}$  NMR** (101 MHz, Benzene- $d_6$ )  $\delta$  170.1, 159.0, 145.2, 142.9, 141.2, 132.6, 130.4, 130.4, 130.0, 129.6, 127.4, 127.1, 123.0, 122.2, 120.8, 120.2, 110.2, 108.3, 82.0, 65.9, 52.9, 40.9, 30.2, 27.7.

**HRMS** (ESI)  $m/z$ :  $[\text{M} + \text{Na}]^+$  Calculated for  $[\text{C}_{26}\text{H}_{25}^{79}\text{BrN}_2\text{O}_5\text{Na}^+]$ : 547.0839 found 547.0840.

**HRMS** (ESI)  $m/z$ :  $[\text{M} + \text{Na}]^+$  Calculated for  $[\text{C}_{26}\text{H}_{25}^{81}\text{BrN}_2\text{O}_5\text{Na}^+]$ : 549.0819 found 549.0819.

**IR** (neat) 3309, 2977, 1718, 1519, 1368, 1256, 1151, 843, 810, 777, 738, 702  $\text{cm}^{-1}$ .

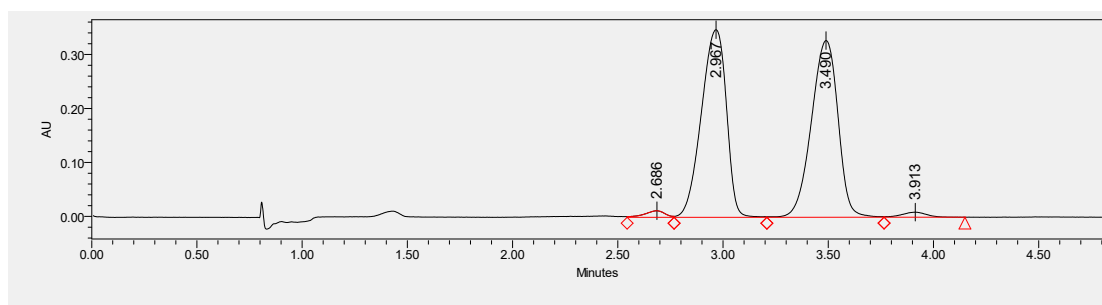

|   | Retention Time | Area    | % Area | Height |
|---|----------------|---------|--------|--------|
| 1 | 2.686          | 80623   | 1.37   | 12236  |
| 2 | 2.967          | 2870329 | 48.61  | 347518 |
| 3 | 3.490          | 2876168 | 48.71  | 327446 |
| 4 | 3.913          | 77366   | 1.31   | 9419   |

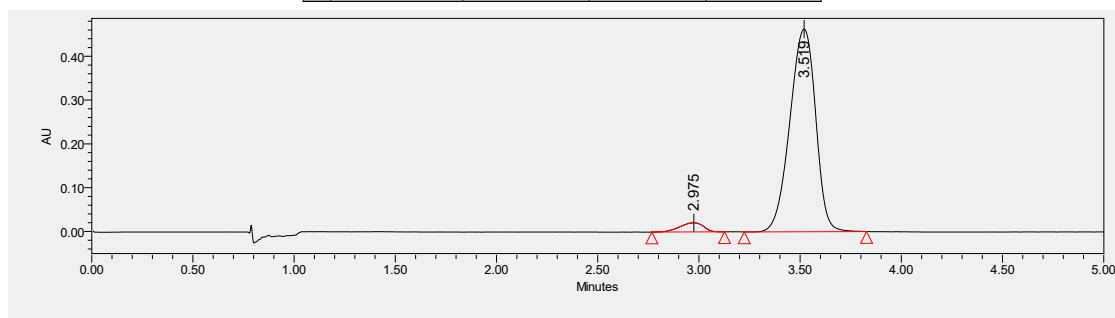

|   | Retention Time | Area    | % Area |
|---|----------------|---------|--------|
| 1 | 2.975          | 169316  | 3.97   |
| 2 | 3.519          | 4092862 | 96.03  |

**Tert-butyl (7a*R*,12a*R*)-7a-hydroxy-7-((methoxycarbonyl)amino)-9-methyl-7a,12-dihydrobenzo[*e*]indeno[1,2-*b*]indole-12a(7H)-carboxylate (C11):**

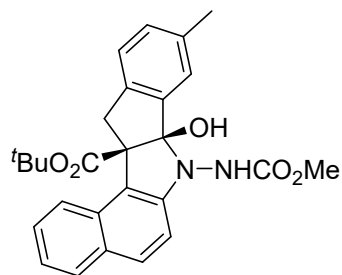

White solid, 99% yield, 89% ee, >19:1 dr, m.p. 115-118 °C,  $[\alpha]_D^{25} = -613.1$  ( $c = 1.12$ , in  $\text{CH}_2\text{Cl}_2$ ).

SFC Daicel Chiralpak IB-3,  $\text{CO}_2/\text{MeOH} = 85/15$ , 1.5 mL/min,  $\lambda = 240$  nm,  $t_1 = 2.42$  min,  $t_2 = 2.80$  min.

$^1\text{H NMR}$  (400 MHz, Benzene- $d_6$ )  $\delta$  7.58 (d,  $J = 7.1$  Hz, 1H), 7.34 (d,  $J = 8.0$  Hz, 1H), 7.19 (d,  $J = 13.2$  Hz, 2H), 7.06 (t,  $J = 7.5$  Hz, 1H), 6.86 (s, 1H), 6.66 – 6.56 (m, 2H), 6.38 (d,  $J = 7.2$  Hz, 1H),

5.81 (s, 1H), 4.69 (s, 1H), 4.34 (d,  $J = 16.0$  Hz, 1H), 3.08 (s, 3H), 2.90 (d,  $J = 16.3$  Hz, 1H), 1.86 (s, 3H), 0.93 (s, 9H).

$^{13}\text{C NMR}$  (101 MHz, Benzene- $d_6$ )  $\delta$  170.5, 158.9, 145.5, 140.5, 139.4, 136.4, 130.7, 130.4, 129.9, 129.6, 127.3, 125.3, 125.1, 122.9, 122.4, 120.6, 110.4, 108.8, 81.8, 65.9, 60.0, 52.8, 41.0, 27.8, 21.2.

HRMS (ESI)  $m/z$ :  $[\text{M} + \text{Na}]^+$  Calculated for  $[\text{C}_{27}\text{H}_{28}\text{N}_2\text{O}_5\text{Na}]^+$ : 483.1890 found 483.1894.

minor isomer  $^1\text{H NMR}$  (400 MHz, Benzene- $d_6$ )  $\delta$  7.27 (s, 1H), 7.18 – 7.09 (m, 4H), 7.03 (d,  $J = 7.9$  Hz, 1H), 6.89 (s, 1H), 6.81 (t,  $J = 7.1$  Hz, 1H), 6.73 (m, 1H), 6.41 (d,  $J = 7.8$  Hz, 1H), 6.34 (d,  $J = 7.8$  Hz, 1H), 3.73 (d,  $J = 16.8$  Hz, 1H), 3.28 (d,  $J = 16.9$  Hz, 1H), 2.92 (s, 3H), 1.40 (s, 3H), 0.73 (s, 9H).

IR (neat) 3312, 2976, 1724, 1628, 1595, 1519, 1368, 1254, 1150, 1062, 952, 844, 778, 743  $\text{cm}^{-1}$ .

Racemate: 3.8:1 dr determined by isolate yield. The HPLC of the cis-isomer as below:

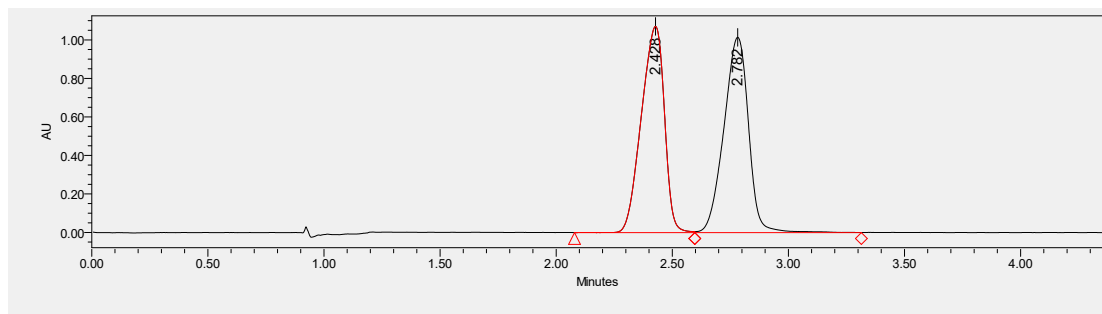

|   | Retention Time | Area    | % Area |
|---|----------------|---------|--------|
| 1 | 2.428          | 7384150 | 49.68  |
| 2 | 2.782          | 7477943 | 50.32  |

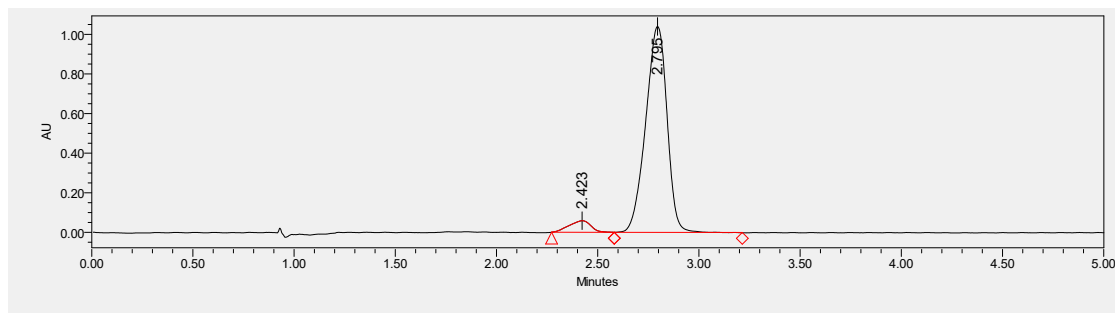

|   | Retention Time | Area    | % Area |
|---|----------------|---------|--------|
| 1 | 2.423          | 436529  | 5.42   |
| 2 | 2.795          | 7624368 | 94.58  |



**Tert-butyl (7a*S*,12a*R*)-8-bromo-7a-hydroxy-7-((methoxycarbonyl)amino)-7a,12-dihydrobenzo[*e*]indeno[1,2-*b*]indole-12a(7*H*)-carboxylate (C12):**

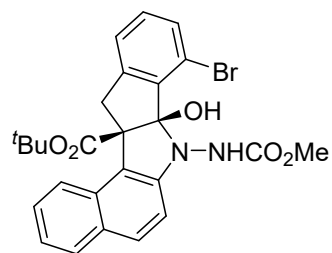

White solid, 83% yield, 6% ee, >19:1 dr, m.p. 138-141 °C,  $[\alpha]_D^{21} = -42.9$  ( $c = 0.47$ , in  $\text{CH}_2\text{Cl}_2$ ).

SFC Daicel Chiralpak IB-3,  $\text{CO}_2/\text{MeOH} = 85/15$ , 1.5 mL/min,  $\lambda = 240$  nm,  $t_1 = 2.98$  min,  $t_2 = 3.61$  min,  $t_3 = 4.26$  min,  $t_4 = 6.05$  min.

$^1\text{H NMR}$  (400 MHz, Benzene- $d_6$ )  $\delta$  7.45 (d,  $J = 7.7$  Hz, 1H), 7.36 (d,  $J = 8.2$  Hz, 1H), 7.22 (d,  $J = 8.7$  Hz, 1H), 7.06 (t,  $J = 7.5$  Hz, 1H), 6.99 (d,  $J = 6.7$  Hz, 1H), 6.90 (m, 1H), 6.42 (m, 2H), 6.35 (t,  $J = 7.5$  Hz, 1H), 5.94 (s, 1H), 5.14 (s, 1H), 4.25 (d,  $J = 17.4$  Hz, 1H), 3.05 (s, 3H), 2.56 (d,  $J = 16.8$  Hz, 1H), 0.93 (s, 9H).

$^{13}\text{C NMR}$  (101 MHz, Benzene- $d_6$ )  $\delta$  170.0, 159.3, 146.1, 132.6, 130.6, 130.4, 129.9, 129.6, 127.2, 124.5, 123.0, 122.5, 120.4, 119.4, 110.7, 82.0, 66.6, 52.9, 41.4, 30.2, 27.7.

HRMS (ESI)  $m/z$ :  $[\text{M} + \text{Na}]^+$  Calculated for  $[\text{C}_{26}\text{H}_{25}^{79}\text{BrN}_2\text{O}_5\text{Na}^+]$ : 547.0839 found 547.0839.

HRMS (ESI)  $m/z$ :  $[\text{M} + \text{Na}]^+$  Calculated for  $[\text{C}_{26}\text{H}_{25}^{81}\text{BrN}_2\text{O}_5\text{Na}^+]$ : 549.0819 found 549.0819.

IR (neat) 3339, 2976, 1721, 1629, 1454, 1368, 1258, 1154, 1061, 871, 843, 770, 745  $\text{cm}^{-1}$ .

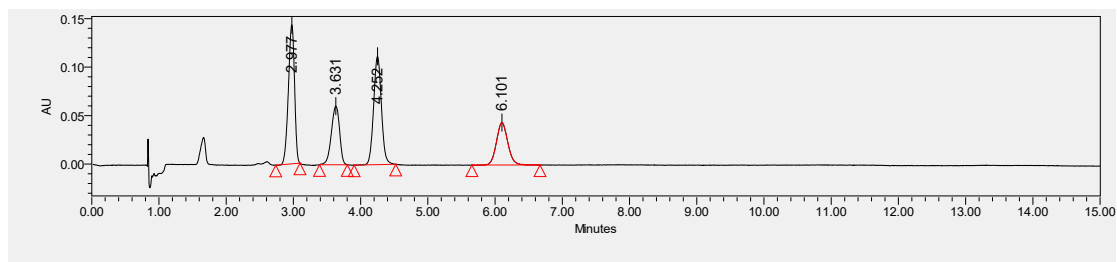

|   | Retention Time | Area   | % Area |
|---|----------------|--------|--------|
| 1 | 2.977          | 910697 | 32.09  |
| 2 | 3.631          | 513989 | 18.11  |
| 3 | 4.252          | 900103 | 31.72  |
| 4 | 6.101          | 513283 | 18.09  |

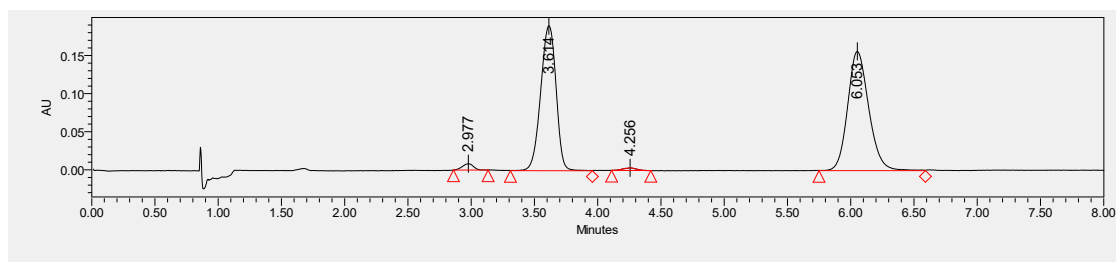

|   | Retention Time | Area    | % Area |
|---|----------------|---------|--------|
| 1 | 2.977          | 50677   | 1.45   |
| 2 | 3.614          | 1604467 | 45.98  |
| 3 | 4.256          | 24737   | 0.71   |
| 4 | 6.053          | 1809644 | 51.86  |

Isopropyl

(7aR,12aR)-7a-hydroxy-7-((methoxycarbonyl)amino)-7a,12-

dihydrobenzo[e]indeno[1,2-b]indole-12a(7H)-carboxylate (C13):

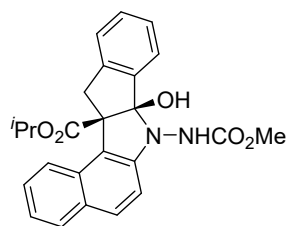

White solid, 68% yield, 73% ee, >19:1 dr, m.p. 100-102 °C,  $[\alpha]_D^{25} = -521.6$  ( $c = 0.82$ , in  $\text{CH}_2\text{Cl}_2$ ).

SFC Daicel Chiralpak IC-3,  $\text{CO}_2/\text{MeOH} = 85/15$ , 1.5 mL/min,  $\lambda = 240$  nm,  $t_1 = 3.89$  min,  $t_2 = 6.59$  min.

$^1\text{H NMR}$  (400 MHz, Benzene- $d_6$ )  $\delta$  7.81 (d,  $J = 6.7$  Hz, 1H), 7.64 (m, 2H), 7.44 (d,  $J = 7.4$  Hz, 1H), 7.34 (t,  $J = 7.4$  Hz, 1H), 7.16 (s, 1H), 7.07 (m, 2H), 6.95 (s, 1H), 6.64 (s, 1H), 6.16 (s, 1H), 5.08 (s, 2H), 4.68 (d,  $J = 15.6$  Hz, 1H), 3.38 (s, 3H), 3.20 (d,  $J = 16.5$  Hz, 1H), 0.92 (d,  $J = 6.0$  Hz, 3H), 0.75 (d,  $J = 6.2$  Hz, 3H).

$^{13}\text{C NMR}$  (101 MHz, Benzene- $d_6$ )  $\delta$  170.9, 158.8, 145.5, 142.3, 140.2, 130.5, 130.1, 129.8, 129.6, 127.4, 127.0, 125.5, 124.7, 123.0, 122.3, 120.1, 110.5, 109.1, 69.4, 65.1, 52.9, 41.7, 21.5, 21.3.

HRMS (ESI)  $m/z$ :  $[\text{M} + \text{Na}]^+$  Calculated for  $[\text{C}_{25}\text{H}_{24}\text{N}_2\text{O}_5\text{Na}]^+$ : 455.1577 found 455.1577.

IR (neat) 3300, 2980, 1717, 1627, 1519, 1464, 1374, 1257, 1106, 925, 812, 735  $\text{cm}^{-1}$ .

Racemate: 5:1 dr determined by isolate yield. The HPLC of the cis-isomer as below:

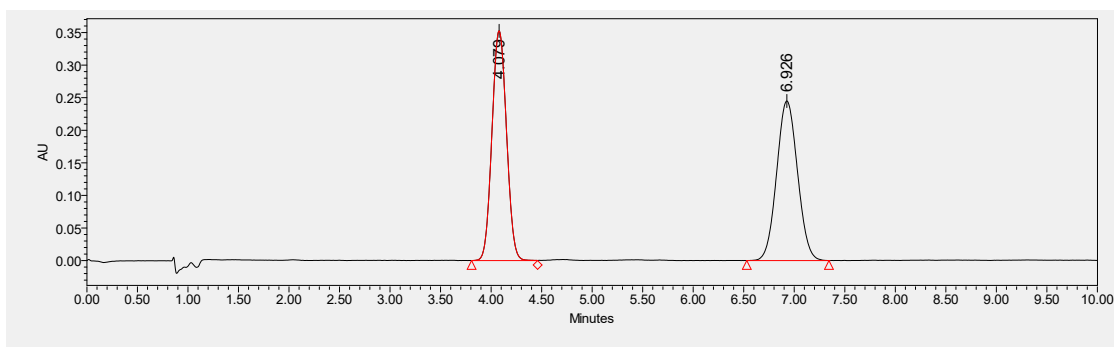

|   | Retention Time | Area    | % Area |
|---|----------------|---------|--------|
| 1 | 4.079          | 3526476 | 50.06  |
| 2 | 6.926          | 3518107 | 49.94  |

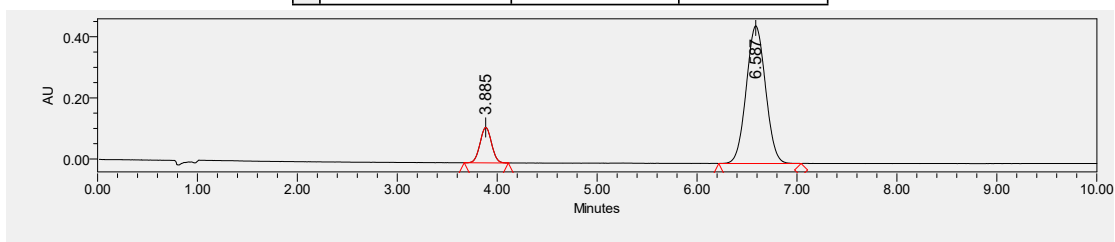

|   | Retention Time | Area    | % Area |
|---|----------------|---------|--------|
| 1 | 3.885          | 927020  | 13.32  |
| 2 | 6.587          | 6032857 | 86.68  |

**Methyl (7a*R*,12a*R*)-7a-hydroxy-7-((methoxycarbonyl)amino)-7a,12-dihydrobenzo[*e*]indeno[1,2-*b*]indole-12a(7*H*)-carboxylate (C14):**

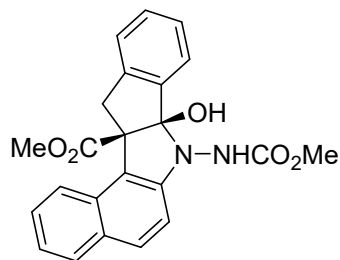

White solid, 89% yield, 55% ee, >19:1 dr, m.p. 134-135 °C,  $[\alpha]_D^{21} = -341.5$  ( $c = 0.35$ , in  $\text{CH}_2\text{Cl}_2$ ).

SFC Daicel Chiralpak IA-3,  $\text{CO}_2/\text{MeOH} = 85/15$ , 1.5 mL/min,  $\lambda = 240$  nm,  $t_1 = 4.10$  min,  $t_2 = 4.80$  min.

$^1\text{H NMR}$  (400 MHz, Benzene- $d_6$ )  $\delta$  7.75 (d,  $J = 7.7$  Hz, 1H), 7.62 (d,  $J = 8.1$  Hz, 2H), 7.47 (d,  $J = 8.6$  Hz, 1H), 7.33 (t,  $J = 7.4$  Hz, 1H), 7.13 (s, 1H), 7.07 (s, 2H), 6.97 – 6.92 (m, 1H), 6.65 (d,  $J =$

7.6 Hz, 1H), 5.90 (s, 1H), 4.98 (s, 1H), 4.65 (d,  $J = 16.1$  Hz, 1H), 3.37 (s, 3H), 3.23 (s, 1H), 3.16 (s, 3H).

$^{13}\text{C NMR}$  (101 MHz, Benzene- $d_6$ )  $\delta$  171.9, 145.4, 142.3, 130.6, 130.5, 130.2, 129.9, 129.7, 127.1, 125.5, 123.1, 122.0, 110.6, 65.4, 52.8, 52.2, 41.8, 30.2.

minor isomer  $^1\text{H NMR}$  (400 MHz, Benzene- $d_6$ )  $\delta$  7.75 (d,  $J = 7.6$  Hz, 1H), 7.62 (s, 1H), 7.57 – 7.50 (m, 3H), 7.40 (d,  $J = 9.3$  Hz, 1H), 7.27 (s, 1H), 7.20 (m, 2H), 6.98 (t,  $J = 7.5$  Hz, 1H), 6.80 (t,  $J = 7.1$  Hz, 2H), 4.05 (d,  $J = 17.1$  Hz, 1H), 3.73 (d,  $J = 17.1$  Hz, 1H), 3.32 (s, 3H), 3.13 (s, 3H).

HRMS (ESI)  $m/z$ :  $[\text{M} + \text{Na}]^+$  Calculated for  $[\text{C}_{23}\text{H}_{20}\text{N}_2\text{O}_5\text{Na}]^+$ : 427.1264 found 427.1263.

IR (neat) 3302, 2953, 1727, 1628, 1519, 1259, 1158, 1080, 860, 734  $\text{cm}^{-1}$ .

Racemate: 3.6:1 dr determined by isolate yield. The HPLC of the cis-isomer as below:

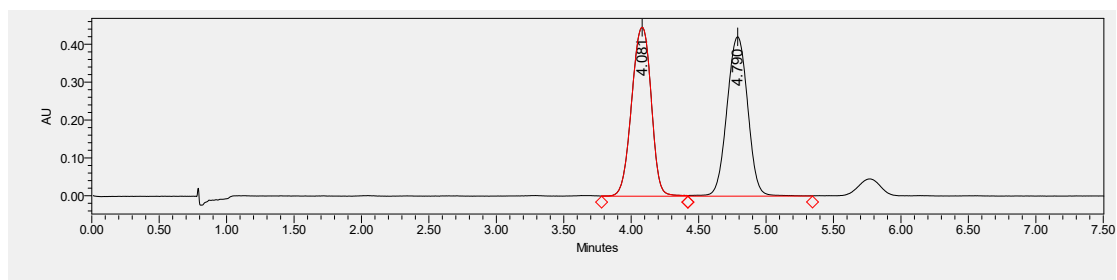

|   | Retention Time | Area    | % Area |
|---|----------------|---------|--------|
| 1 | 4.081          | 4477613 | 49.84  |
| 2 | 4.790          | 4506314 | 50.16  |

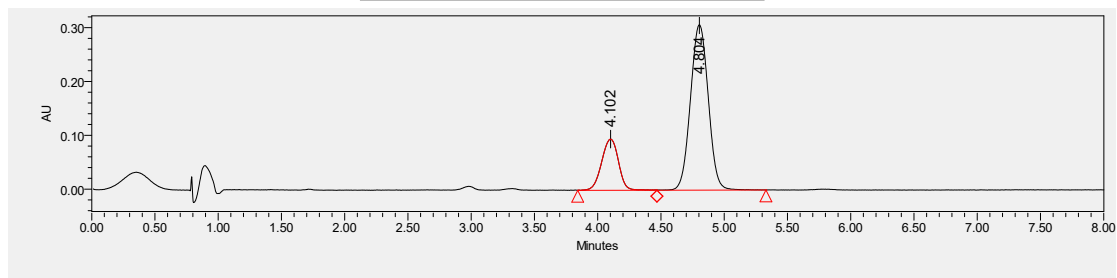

|   | Retention Time | Area    | % Area |
|---|----------------|---------|--------|
| 1 | 4.102          | 879922  | 22.62  |
| 2 | 4.804          | 3009417 | 77.38  |

**Methyl ((7a*R*,12a*R*)-12a-(tert-butylcarbamoyl)-7a-hydroxy-12,12a-dihydrobenzo[*e*]indeno[1,2-*b*]indol-7(7a*H*)-yl)carbamate (C15):**

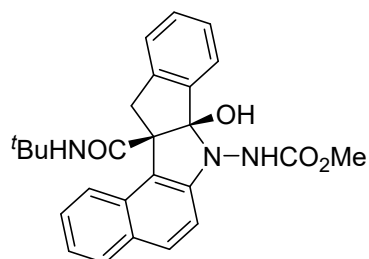

White solid, 92% yield, 34% ee, 81:19 dr, m.p. 139-141 °C,  $[\alpha]_{\text{D}}^{24} = -152.1$  ( $c = 0.82$ , in  $\text{CH}_2\text{Cl}_2$ ).

**SFC** Daicel Chiralcel OX-3,  $\text{CO}_2/\text{MeOH} = 85/15$ , 1.5 mL/min,  $\lambda = 240$  nm,  $t_1 = 3.80$  min,  $t_2 = 4.43$  min,  $t_3 = 5.47$  min,  $t_4 = 6.88$  min.

**$^1\text{H}$  NMR** (400 MHz, Acetone- $d_6$ )  $\delta$  9.01 (s, 1H), 7.83 (d,  $J = 8.2$  Hz, 1H), 7.78 (d,  $J = 8.7$  Hz, 1H), 7.62 (d,  $J = 8.6$  Hz, 1H), 7.56–7.48 (m, 2H), 7.33–7.28 (m, 1H), 7.23 (q,  $J = 7.0, 6.2$  Hz, 3H), 6.95 (d,  $J = 8.7$  Hz, 1H), 6.08 (s, 1H), 5.15 (s, 1H), 4.65 (d,  $J = 15.8$  Hz, 1H), 3.81 (s, 3H), 3.11 (d,  $J = 15.8$  Hz, 1H), 1.17 (s, 9H).

**$^{13}\text{C}$  NMR** (101 MHz, Acetone- $d_6$ )  $\delta$  169.4, 160.6, 143.0, 131.2, 131.0, 130.8, 128.1, 127.6, 125.7, 124.9, 123.7, 123.0, 111.9, 108.5, 60.7, 66.3, 53.4, 51.8, 40.9, 28.7, 21.0, 14.6.

**HRMS** (ESI)  $m/z$ :  $[\text{M} + \text{Na}]^+$  Calculated for  $[\text{C}_{26}\text{H}_{27}\text{N}_3\text{O}_4\text{Na}]^+$ : 468.1894 found 468.1895.

**IR** (neat) 3267, 2964, 1714, 1664, 1626, 1518, 1455, 1364, 1224, 813, 747  $\text{cm}^{-1}$ .

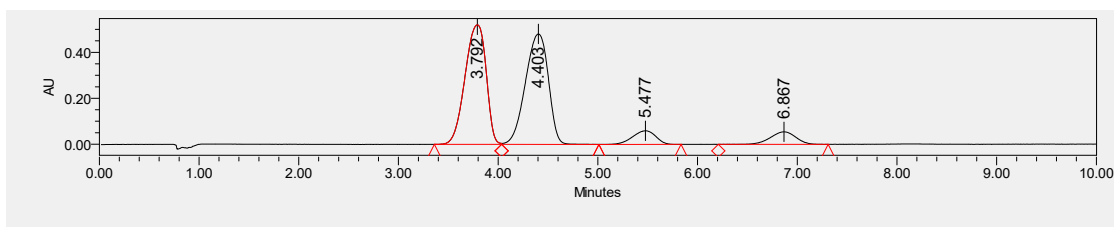

|   | Retention Time | Area    | % Area |
|---|----------------|---------|--------|
| 1 | 3.792          | 7640007 | 44.25  |
| 2 | 4.403          | 7683900 | 44.50  |
| 3 | 5.477          | 964613  | 5.59   |
| 4 | 6.867          | 977218  | 5.66   |

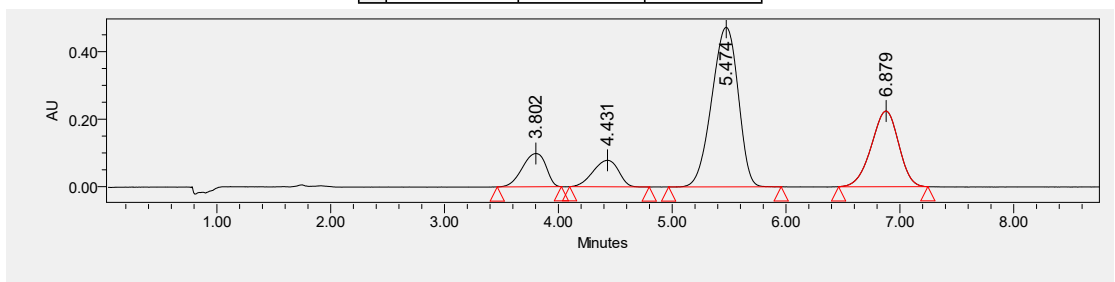

|   | Retention Time | Area    | % Area |
|---|----------------|---------|--------|
| 1 | 3.802          | 1422648 | 10.15  |
| 2 | 4.431          | 1227002 | 8.76   |
| 3 | 5.474          | 7620989 | 54.39  |
| 4 | 6.879          | 3740644 | 26.70  |

**(3*S*,5*S*,7*S*)-adamantan-1-yl (7*aR*,10*aR*)-7*a*-hydroxy-7-((methoxycarbonyl)amino)-7*a*,8,9,10-tetrahydrobenzo[*e*]cyclopenta[*b*]indole-10*a*(7*H*)-carboxylate (C16):**

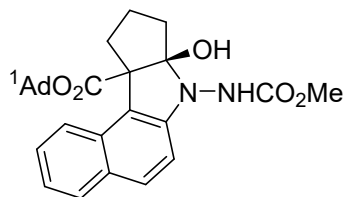

White solid, 98% yield, 95% ee, >19:1 dr, m.p. 136-138 °C,  $[\alpha]_D^{28} = -59.4$  ( $c = 0.86$ , in  $\text{CH}_2\text{Cl}_2$ ).

**SFC** Daicel Chiralpak IB-3,  $\text{CO}_2/\text{MeOH} = 85/15$ , 1.5 mL/min,  $\lambda = 240$  nm,  $t_1 = 4.10$  min,  $t_2 = 4.73$  min

**$^1\text{H}$  NMR** (400 MHz, Chloroform-*d*)  $\delta$  7.75 (d,  $J = 8.2$  Hz, 1H), 7.68 (d,  $J = 8.6$  Hz, 1H), 7.54 (d,  $J = 8.1$  Hz, 1H), 7.40 (t,  $J = 7.3$  Hz, 1H), 7.28 – 7.20 (m, 1H), 6.89 (s, 1H), 6.87 (s, 1H), 4.14 (s, 1H), 3.79 (s, 3H), 2.99 (q,  $J = 11.7$  Hz, 1H), 2.20 (s, 1H), 2.07 (s, 4H), 1.98 (s, 7H), 1.81 (s, 1H), 1.74 (s, 1H), 1.57 (s, 6H).

**$^{13}\text{C}$  NMR** (101 MHz, Chloroform-*d*)  $\delta$  170.8, 158.3, 145.9, 129.8, 129.1, 126.8, 122.4, 121.9, 119.1, 109.6, 107.4, 82.1, 64.6, 60.4, 53.1, 41.1, 37.0, 36.0, 35.3, 30.7, 23.1.

**HRMS** (ESI)  $m/z$ :  $[\text{M} + \text{Na}]^+$  Calculated for  $[\text{C}_{28}\text{H}_{32}\text{N}_2\text{O}_5\text{Na}]^+$ : 499.2203 found 499.2204.

**IR** (neat) 3302, 2911, 1723, 1628, 1520, 1257, 1054, 810, 741  $\text{cm}^{-1}$ .

Racemate: 17:1 dr determined by isolate yield. The HPLC of the cis-isomer as below:

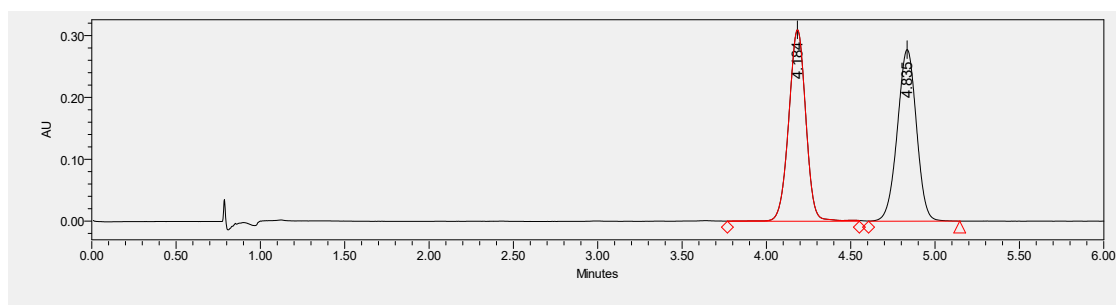

|   | Retention Time | Area    | % Area |
|---|----------------|---------|--------|
| 1 | 4.184          | 2176698 | 49.90  |
| 2 | 4.835          | 2185092 | 50.10  |

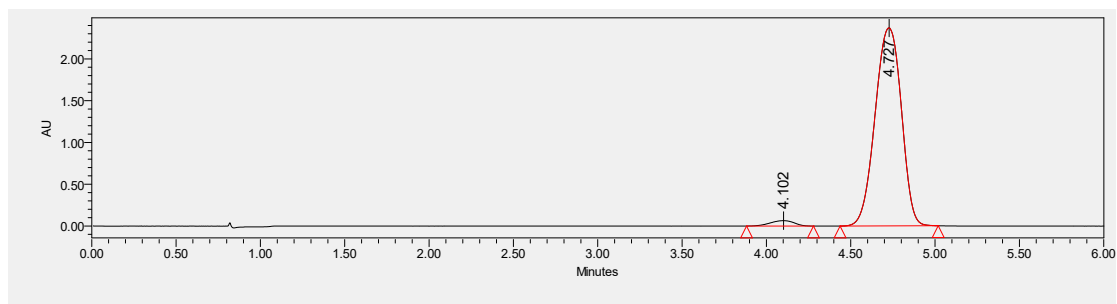

|   | Retention Time | Area     | % Area |
|---|----------------|----------|--------|
| 1 | 4.102          | 634155   | 2.42   |
| 2 | 4.727          | 25615884 | 97.58  |

**Tert-butyl (7*R*,10*aR*)-7*a*-hydroxy-7-((methoxycarbonyl)amino)-7*a*,8,9,10-tetrahydrobenzo[e]cyclopenta[*b*]indole-10*a*(7*H*)-carboxylate (C17):**

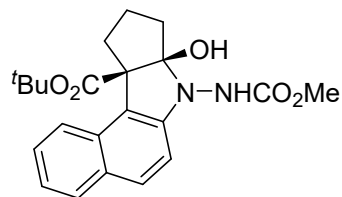

White solid, 89% yield, 96% ee, >19:1 dr, m.p. 90-91 °C,  $[\alpha]_D^{24} = -407.7$  ( $c = 1.19$ , in  $\text{CH}_2\text{Cl}_2$ ).

SFC Daicel Chiralpak IB-3,  $\text{CO}_2/\text{MeOH} = 85/15$ , 1.5 mL/min,  $\lambda = 240$  nm,  $t_1 = 3.02$  min,  $t_2 = 3.39$  min.

$^1\text{H NMR}$  (600 MHz, Benzene- $d_6$ )  $\delta$  7.78 (d,  $J = 7.5$  Hz, 1H), 7.63 (d,  $J = 8.0$  Hz, 1H), 7.51 (d,  $J = 8.5$  Hz, 1H), 7.29 (t,  $J = 7.5$  Hz, 1H), 7.14 – 7.09 (m, 1H), 6.71 (d, 1H), 6.03 (s, 1H), 4.60 (s, 1H), 3.31 (s, 4H), 2.26 – 1.88 (m, 3H), 1.59 (s, 1H), 1.25 (s, 9H), 1.18 (s, 1H).

$^{13}\text{C NMR}$  (151 MHz, Benzene- $d_6$ )  $\delta$  171.1, 158.9, 146.7, 130.5, 130.3, 129.8, 129.6, 127.1, 122.6, 122.3, 110.0, 108.3, 81.5, 64.9, 52.6, 37.6, 35.8, 27.8, 23.3.

HRMS (ESI)  $m/z$ :  $[\text{M} + \text{Na}]^+$  Calculated for  $[\text{C}_{22}\text{H}_{26}\text{N}_2\text{O}_5\text{Na}]^+$ : 421.1734 found 421.1734.

IR (neat) 3297, 2972, 1723, 1520, 1368, 1257, 1159, 810, 740  $\text{cm}^{-1}$ .

Racemate: 8.6:1 dr determined by isolate yield. The HPLC of the cis-isomer as below:

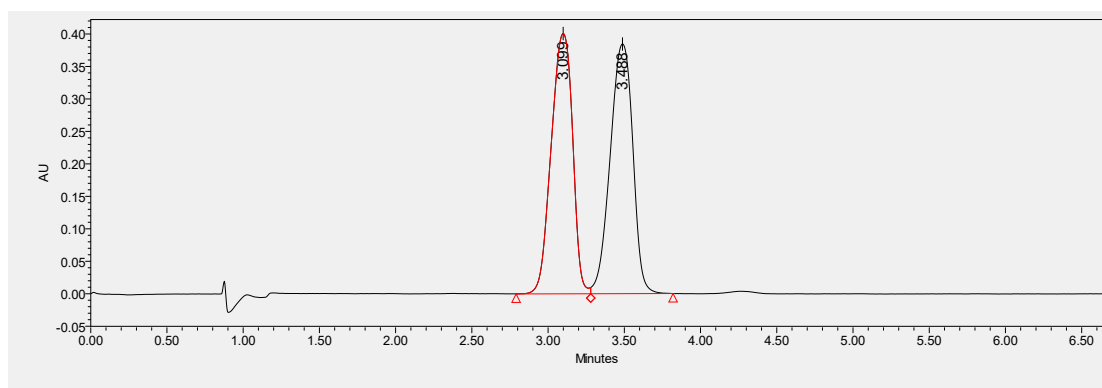

|   | Retention Time | Area    | % Area |
|---|----------------|---------|--------|
| 1 | 3.099          | 3911659 | 49.68  |
| 2 | 3.488          | 3961818 | 50.32  |

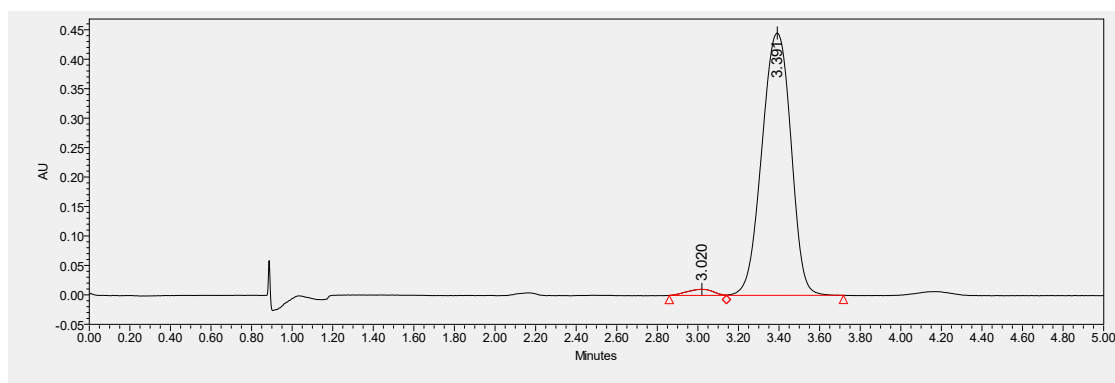

|   | Retention Time | Area    | % Area |
|---|----------------|---------|--------|
| 1 | 3.020          | 92594   | 2.05   |
| 2 | 3.391          | 4428784 | 97.95  |

**Cyclohexyl (7*aR*,10*aR*)-7*a*-hydroxy-7-((methoxycarbonyl)amino)-7*a*,8,9,10-tetrahydrobenzo[e]cyclopenta[*b*]indole-10*a*(7*H*)-carboxylate (C18):**

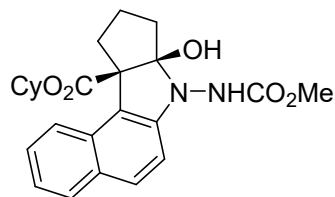

White solid, 77% yield, 90% ee, >19:1 dr, m.p. 90-95 °C,  $[\alpha]_D^{24} = -201.6$  ( $c = 0.96$ , in  $\text{CH}_2\text{Cl}_2$ ).

SFC Daicel Chiralpak IB-3,  $\text{CO}_2/\text{MeOH} = 85/15$ , 1.5 mL/min,  $\lambda = 240$  nm,  $t_1 = 2.93$  min,  $t_2 = 3.37$  min

$^1\text{H NMR}$  (600 MHz, Benzene- $d_6$ )  $\delta$  7.76 (d,  $J = 7.8$  Hz, 1H), 7.63 (d,  $J = 8.1$  Hz, 1H), 7.51 (d,  $J = 8.5$  Hz, 1H), 7.28 (t,  $J = 7.5$  Hz, 1H), 7.12 (t,  $J = 7.3$  Hz, 1H), 6.82 – 6.62 (m, 1H), 6.02 (s, 1H), 5.02 (s, 1H), 3.40 (s, 1H), 3.31 (s, 3H), 2.23 – 1.94 (m, 3H), 1.58 (m, 4H), 1.30 (m, 3H), 1.15 – 0.89 (m, 5H), 0.73 (s, 1H).

$^{13}\text{C NMR}$  (151 MHz, Benzene- $d_6$ )  $\delta$  171.5, 158.9, 146.7, 130.6, 130.3, 130.0, 129.6, 127.2, 122.7, 122.2, 119.5, 109.9, 108.5, 73.7, 64.4, 52.7, 37.5, 36.0, 31.7, 31.4, 25.2, 23.6, 23.4.

HRMS (ESI)  $m/z$ :  $[\text{M} + \text{Na}]^+$  Calculated for  $[\text{C}_{24}\text{H}_{28}\text{N}_2\text{O}_5\text{Na}]^+$ : 447.1890 found 447.1890.

IR (neat) 3293, 2937, 2858, 1720, 1628, 1520, 1449, 1374, 1236, 1156, 810, 738  $\text{cm}^{-1}$ .

Racemate: 12.5:1 dr determined by isolate yield. The HPLC of the cis-isomer as below:

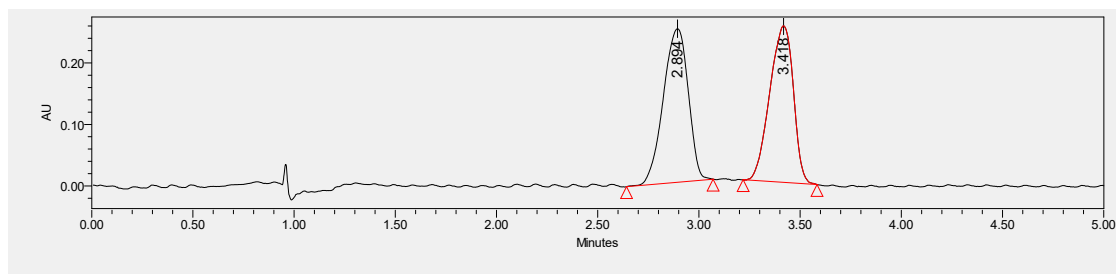

|   | Retention Time | Area    | % Area |
|---|----------------|---------|--------|
| 1 | 2.894          | 2137618 | 50.91  |
| 2 | 3.418          | 2061304 | 49.09  |

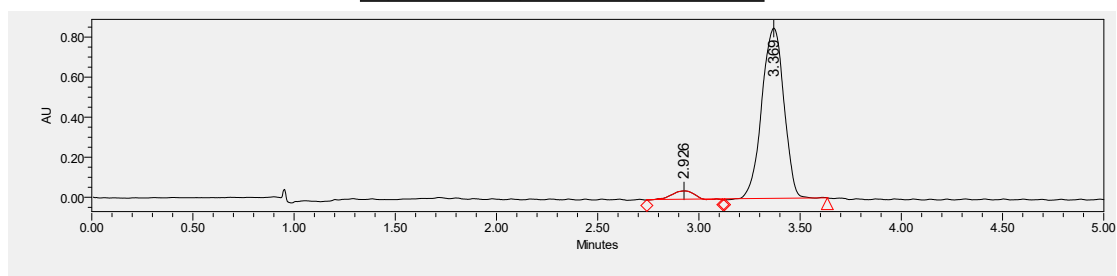

|   | Retention Time | Area    | % Area |
|---|----------------|---------|--------|
| 1 | 2.926          | 322754  | 4.76   |
| 2 | 3.369          | 6459431 | 95.24  |

**Ethyl (7a*R*,10a*R*)-7a-hydroxy-7-((methoxycarbonyl)amino)-7a,8,9,10-tetrahydrobenzo[e]cyclopenta[b]indole-10a(7*H*)-carboxylate (C19):**

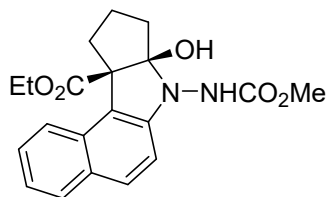

White solid, 94% yield, 86% ee, >19:1 dr, m.p. 85-89 °C,  $[\alpha]_D^{24} = -407.7$  ( $c = 1.15$ , in  $\text{CH}_2\text{Cl}_2$ ).

SFC Daicel Chiralpak IA-3,  $\text{CO}_2/\text{MeOH} = 85/15$ , 1.5 mL/min,  $\lambda = 240$  nm,  $t_1 = 2.45$  min,  $t_2 = 2.87$  min.

$^1\text{H NMR}$  (600 MHz, Benzene- $d_6$ )  $\delta$  7.69 (d,  $J = 6.3$  Hz, 1H), 7.60 (d,  $J = 8.1$  Hz, 1H), 7.48 (d,  $J = 8.5$  Hz, 1H), 7.26 (t,  $J = 7.5$  Hz, 1H), 7.11 (t,  $J = 7.3$  Hz, 1H), 6.71 (s, 1H), 6.15 (s, 1H), 4.62 (s, 1H), 3.95 (p,  $J = 7.1$  Hz, 1H), 3.86 (s, 1H), 3.31 (s, 4H), 2.09 (m, 3H), 1.61 (s, 1H), 0.74-0.79 (m, 4H).

$^{13}\text{C NMR}$  (151 MHz, Benzene- $d_6$ )  $\delta$  172.3, 158.8, 146.8, 130.5, 130.4, 130.1, 129.6, 127.3, 122.7, 122.1, 119.3, 110.0, 108.5, 64.4, 61.5, 52.7, 37.4, 36.2, 23.4, 14.1.

HRMS (ESI)  $m/z$ :  $[\text{M} + \text{Na}]^+$  Calculated for  $[\text{C}_{20}\text{H}_{22}\text{N}_2\text{O}_5\text{Na}]^+$ : 393.1421 found 393.1421.

IR (neat) 3293, 2960, 1714, 1628, 1596, 1520, 1444, 1235, 1097, 810, 777, 736  $\text{cm}^{-1}$ .

Racemate: 5.5:1 dr determined by isolate yield. The HPLC of the cis-isomer as below:

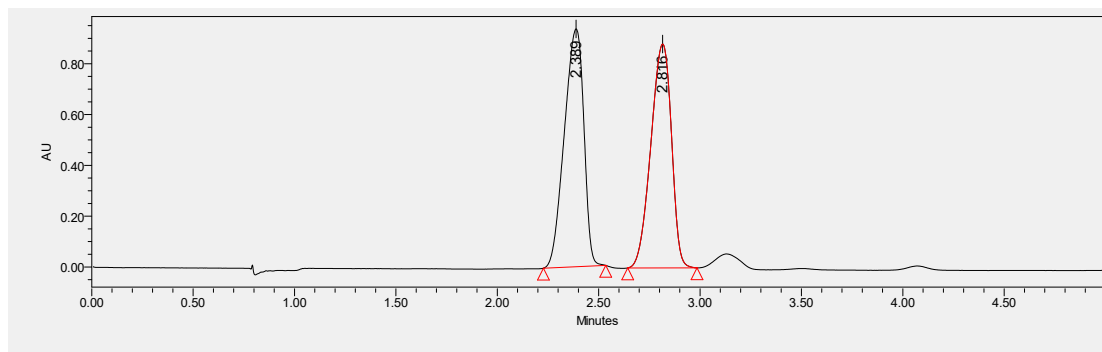

|   | Retention Time | Area    | % Area |
|---|----------------|---------|--------|
| 1 | 2.389          | 6251229 | 50.14  |
| 2 | 2.816          | 6216539 | 49.86  |

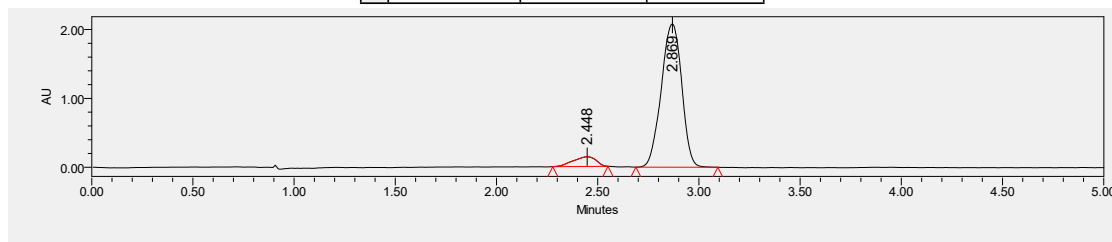

|   | Retention Time | Area     | % Area |
|---|----------------|----------|--------|
| 1 | 2.448          | 1102783  | 7.01   |
| 2 | 2.869          | 14621167 | 92.99  |



**Methyl ((7a*R*,10a*R*)-10a-(((3*S*,5*S*,7*S*)-adamantan-1-yl)carbamoyl)-7a-hydroxy-8,9,10,10a-tetrahydrobenzo[*e*]cyclopenta[*b*]indol-7(7a*H*)-yl)carbamate (C20):**

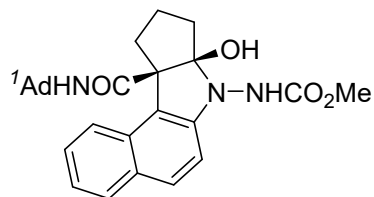

White solid, 99% yield, 56% ee, 87:13 dr, m.p. 142-146 °C,  $[\alpha]_{\text{D}}^{20} = -57.3$  ( $c = 0.98$ , in  $\text{CH}_2\text{Cl}_2$ ).

SFC Daicel Chiralcel OX-3,  $\text{CO}_2/\text{MeOH} = 85/15$ , 1.5 mL/min,  $\lambda = 240$  nm,  $t_1 = 7.90$  min,  $t_2 = 9.03$  min,  $t_3 = 10.70$  min,  $t_4 = 27.21$  min.

$^1\text{H NMR}$  (400 MHz, Acetone- $d_6$ )  $\delta$  7.81 (d,  $J = 8.2$  Hz, 1H), 7.77 (d,  $J = 8.7$  Hz, 1H), 7.51 (d,  $J = 8.4$  Hz, 1H), 7.45 (t,  $J = 7.5$  Hz, 1H), 7.26 (t,  $J = 7.4$  Hz, 1H), 6.95 (d,  $J = 8.7$  Hz, 1H), 5.50 (s, 1H), 3.74 (s, 3H), 3.17 (q,  $J = 11.4$  Hz, 1H), 2.22–2.20 (m, 1H), 1.92 (s, 3H), 1.85 (d,  $J = 11.9$  Hz, 5H), 1.77 (d,  $J = 11.8$  Hz, 4H), 1.56 (t,  $J = 10.7$  Hz, 6H).

$^{13}\text{C NMR}$  (101 MHz, Acetone- $d_6$ )  $\delta$  169.8, 148.9, 131.1, 130.8, 130.7, 130.1, 127.8, 123.3, 123.1, 119.5, 111.3, 108.2, 65.5, 60.7, 53.3, 52.3, 42.0, 37.2, 23.8, 21.0, 14.6.

HRMS (ESI)  $m/z$ :  $[\text{M} + \text{Na}]^+$  Calculated for  $[\text{C}_{28}\text{H}_{33}\text{N}_3\text{O}_4\text{Na}]^+$ : 498.2363 found 498.2364.

IR (neat) 3267, 2908, 1730, 1657, 1518, 1359, 1261, 1122, 810, 739  $\text{cm}^{-1}$ .

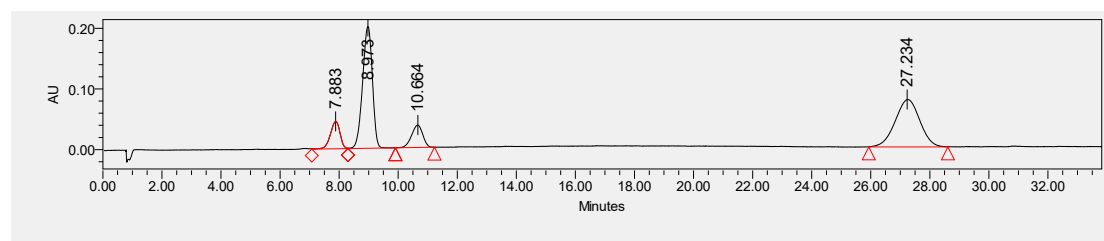

|   | Retention Time | Area    | % Area |
|---|----------------|---------|--------|
| 1 | 7.883          | 1021367 | 9.16   |
| 2 | 8.973          | 4626064 | 41.48  |
| 3 | 10.664         | 977415  | 8.76   |
| 4 | 27.234         | 4528593 | 40.60  |

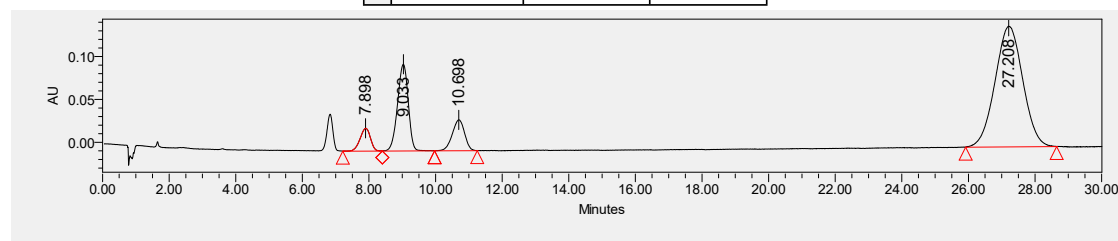

|   | Retention Time | Area    | % Area |
|---|----------------|---------|--------|
| 1 | 7.898          | 576924  | 4.85   |
| 2 | 9.033          | 2263363 | 19.03  |
| 3 | 10.698         | 928155  | 7.81   |
| 4 | 27.208         | 8122189 | 68.31  |

**(3*S*,5*S*,7*S*)-adamantan-1-yl (7*aR*,10*aR*)-7-((ethoxycarbonyl)amino)-7*a*-hydroxy-7*a*,8,9,10-tetrahydrobenzo[*e*]cyclopenta[*b*]indole-10*a*(7*H*)-carboxylate (C21):**

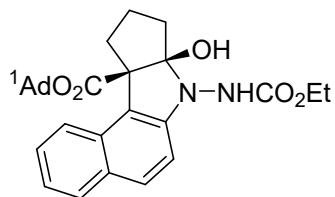

White solid, 88% yield, 96% ee, >19:1 dr, m.p. 98-101 °C,  $[\alpha]_D^{24} = -235.4$  ( $c = 0.75$ , in  $\text{CH}_2\text{Cl}_2$ ).

SFC Daicel Chiralpak IB-3,  $\text{CO}_2/\text{MeOH} = 85/15$ , 1.5 mL/min,  $\lambda = 240$  nm,  $t_1 = 3.72$  min,  $t_2 = 4.21$  min.

$^1\text{H NMR}$  (400 MHz, Chloroform-*d*)  $\delta$  7.75 (d,  $J = 8.2$  Hz, 1H), 7.68 (d,  $J = 8.6$  Hz, 1H), 7.54 (d,  $J = 8.3$  Hz, 1H), 7.40 (t,  $J = 8.0$  Hz, 1H), 7.26 – 7.19 (m, 1H), 6.89 (d,  $J = 8.5$  Hz, 1H), 6.79 (s, 1H), 4.24 (q,  $J = 7.0$  Hz, 2H), 4.15 (s, 1H), 2.99 (q,  $J = 12.0$  Hz, 1H), 2.22 (s, 1H), 2.09 (d,  $J = 20.1$  Hz, 4H), 1.98 (s, 7H), 1.86 – 1.76 (m, 1H), 1.75 – 1.63 (m, 1H), 1.57 (s, 6H), 1.32 (s, 3H).

$^{13}\text{C NMR}$  (101 MHz, Chloroform-*d*)  $\delta$  170.9, 157.8, 146.0, 129.7, 129.1, 126.7, 122.4, 121.9, 119.0, 109.6, 107.4, 82.0, 64.5, 62.2, 41.1, 37.0, 36.0, 35.3, 30.7, 29.7, 23.0, 14.5.

HRMS (ESI)  $m/z$ :  $[\text{M} + \text{Na}]^+$  Calculated for  $[\text{C}_{29}\text{H}_{34}\text{N}_2\text{O}_5\text{Na}]^+$ : 513.2360 found 513.2364.

IR (neat) 3299, 2911, 1720, 1628, 1520, 1321, 1236, 1054, 809, 741  $\text{cm}^{-1}$ .

Racemate: 7:1 dr determined by isolate yield. The HPLC of the cis-isomer as below:

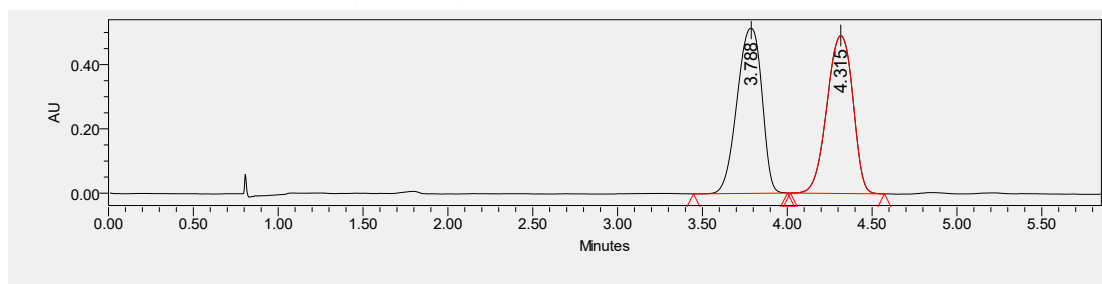

|   | Retention Time | Area     | % Area |
|---|----------------|----------|--------|
| 1 | 3.788          | 12803867 | 50.05  |
| 2 | 4.315          | 12801796 | 49.95  |

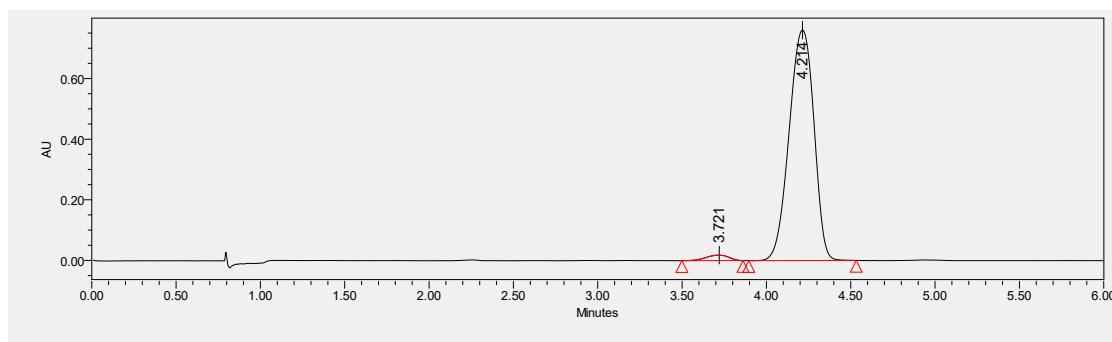

|   | Retention Time | Area    | % Area |
|---|----------------|---------|--------|
| 1 | 3.721          | 167975  | 2.12   |
| 2 | 4.214          | 7771404 | 97.88  |

**(3R)-adamantan-1-yl (7aR,10aR)-7a-hydroxy-7-((isopropoxycarbonyl)amino)-7a,8,9,10-tetrahydrobenzo[e]cyclopenta[b]indole-10a(7H)-carboxylate (C22):**

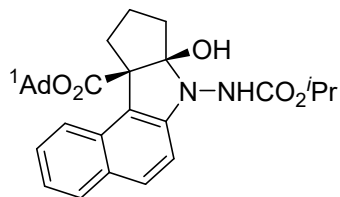

White solid, 86% yield, 96% ee, >19:1 dr, m.p. 101-105 °C,  $[\alpha]^{24}_D = -276.0$  ( $c = 0.87$ , in  $\text{CH}_2\text{Cl}_2$ ).

SFC Daicel Chiralpak IB-3,  $\text{CO}_2/\text{MeOH} = 85/15$ , 1.5 mL/min,  $\lambda = 240$  nm,  $t_1 = 3.16$  min,  $t_2 = 3.56$  min.

$^1\text{H NMR}$  (400 MHz, Acetone- $d_6$ )  $\delta$  7.65 (d,  $J = 8.2$  Hz, 1H), 7.59 (d,  $J = 8.6$  Hz, 1H), 7.30 (dt,  $J = 15.8, 8.3$  Hz, 2H), 7.08 (ddd,  $J = 8.0, 6.6, 1.3$  Hz, 1H), 6.74 (d,  $J = 8.6$  Hz, 1H), 4.81 (p,  $J = 6.2$  Hz, 1H), 2.87 (q,  $J = 12.1$  Hz, 1H), 2.11 (d, 1H), 1.93 (m, 2H), 1.85 (m, 8H), 1.77 – 1.69 (m, 1H), 1.67 – 1.58 (m, 1H), 1.51 – 1.42 (m, 6H), 1.15 (d,  $J = 5.0$  Hz, 6H).

$^{13}\text{C NMR}$  (101 MHz, Acetone- $d_6$ ) 171.4, 157.9, 148.1, 131.0, 130.6, 130.3, 130.1, 127.5, 122.9, 120.0, 110.7, 108.7, 81.5, 70.0, 65.4, 42.1, 38.1, 37.0, 31.8, 23.8, 22.5, 22.4, 14.7.

HRMS (ESI)  $m/z$ :  $[\text{M} + \text{Na}]^+$  Calculated for  $[\text{C}_{30}\text{H}_{36}\text{N}_2\text{O}_5\text{Na}]^+$ : 527.2516 found 527.2518.

IR (neat) 3303, 2912, 1722, 1628, 1520, 1256, 1108, 809, 743  $\text{cm}^{-1}$ .

Racemate: 18:1 dr determined by isolate yield. The HPLC of the cis-isomer as below:

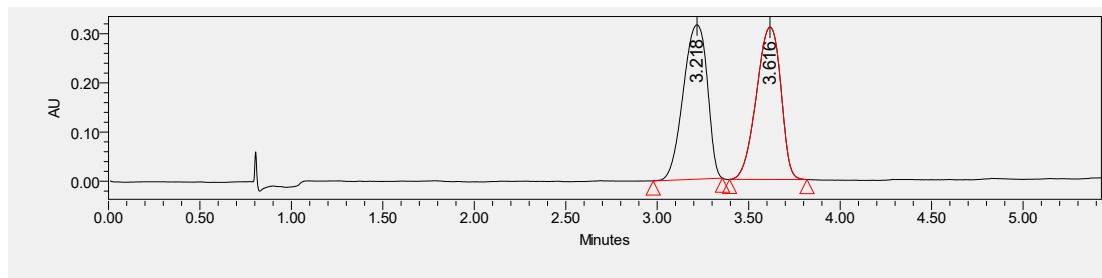

|   | Retention Time | Area     | % Area |
|---|----------------|----------|--------|
| 1 | 3.218          | 10366053 | 49.96  |
| 2 | 3.616          | 10380843 | 50.04  |

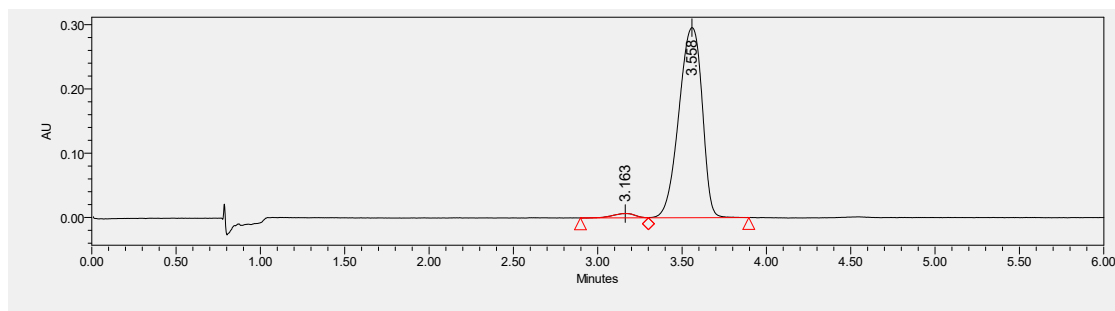

|   | Retention Time | Area    | % Area |
|---|----------------|---------|--------|
| 1 | 3.163          | 60389   | 2.09   |
| 2 | 3.558          | 2826624 | 97.91  |

**(3R)-adamantan-1-yl (7aR,10aR)-7a-hydroxy-7-((isobutoxycarbonyl)amino)-7a,8,9,10-tetrahydrobenzo[e]cyclopenta[b]indole-10a(7H)-carboxylate (C23):**

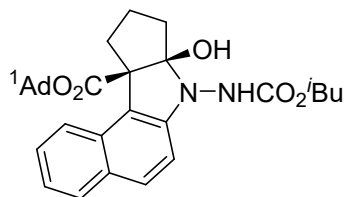

White solid, 84% yield, 96% ee, >19:1 dr, m.p. 103-107 °C,  $[\alpha]_D^{26} = -69.4$  (c = 0.50, in CH<sub>2</sub>Cl<sub>2</sub>).

SFC Daicel Chiralpak IB-3, CO<sub>2</sub>/MeOH = 85/15, 1.5 mL/min,  $\lambda = 240$  nm,  $t_1 = 3.34$  min,  $t_2 = 3.83$  min

<sup>1</sup>H NMR (400 MHz, Chloroform-*d*)  $\delta$  7.75 (d,  $J = 8.2$  Hz, 1H), 7.69 (d,  $J = 8.6$  Hz, 1H), 7.53 (d,  $J = 8.2$  Hz, 1H), 7.39 (t,  $J = 7.6$  Hz, 1H), 7.26 – 7.19 (t, 1H), 6.88 (d,  $J = 8.4$  Hz, 1H), 6.83 (s, 1H), 4.15 (s, 1H), 3.97 (d,  $J = 5.4$  Hz, 2H), 3.05 – 2.91 (m, 1H), 2.22 (s, 1H), 2.07 (s, 4H), 1.97 (s, 8H), 1.79 (s, 1H), 1.70 (s, 1H), 1.57 (s, 6H), 0.92 (d,  $J = 43.0$  Hz, 6H).  
<sup>13</sup>C NMR (101 MHz, Chloroform-*d*)  $\delta$  171.0, 158.1, 146.1, 129.7, 129.1, 126.7, 122.3, 121.9, 119.2, 109.6, 107.4, 82.1, 77.4, 77.0, 76.7, 72.2, 64.5, 45.3, 41.1, 37.0, 36.0, 35.4, 30.7, 29.7, 28.0, 23.1, 19.0.

HRMS (ESI)  $m/z$ :  $[M + Na]^+$  Calculated for [C<sub>31</sub>H<sub>38</sub>N<sub>2</sub>O<sub>5</sub>Na<sup>+</sup>]: 541.2673 found 541.2673.

IR (neat) 3306, 2912, 1724, 1257, 1236, 1055, 809 cm<sup>-1</sup>.

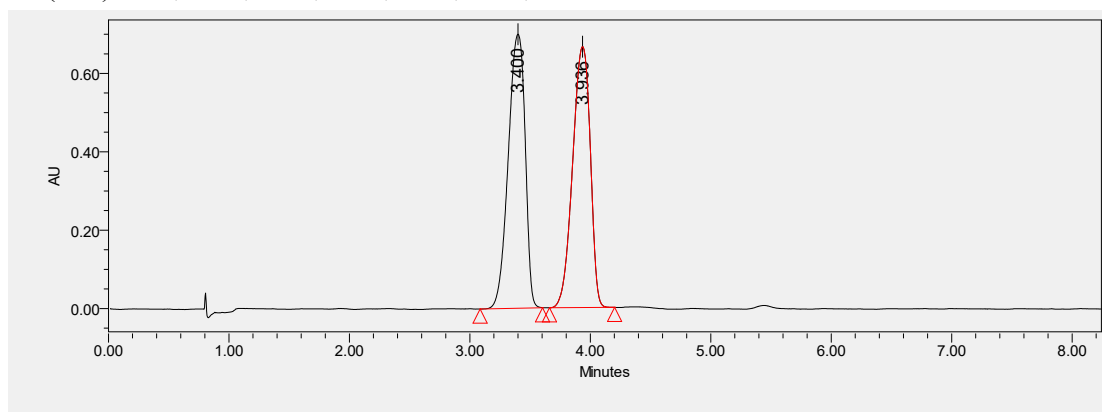

|   | Retention Time | Area    | % Area |
|---|----------------|---------|--------|
| 1 | 3.400          | 6802121 | 50.10  |
| 2 | 3.936          | 6775297 | 49.90  |

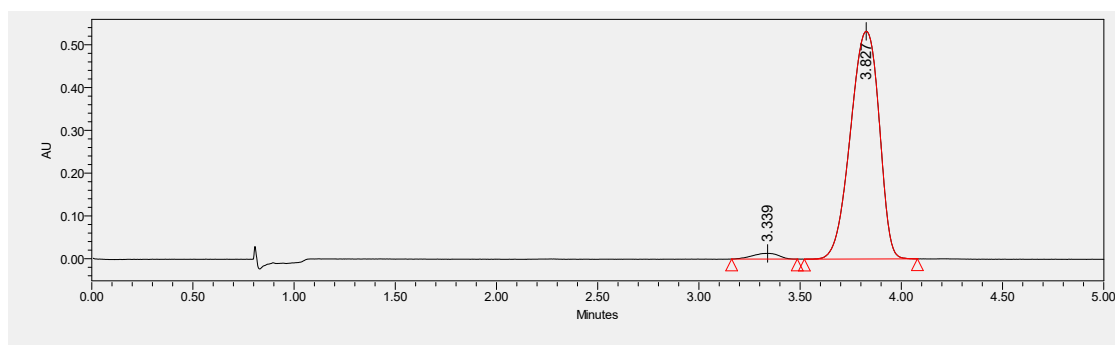

|   | Retention Time | Area    | % Area |
|---|----------------|---------|--------|
| 1 | 3.339          | 119340  | 2.22   |
| 2 | 3.827          | 5245045 | 97.78  |

**(3*R*)-adamantan-1-yl (7*aR*,10*aR*)-7-(((benzyloxy)carbonyl)amino)-7*a*-hydroxy-7*a*,8,9,10-tetrahydrobenzo[*e*]cyclopenta[*b*]indole-10*a*(7*H*)-carboxylate (C24):**

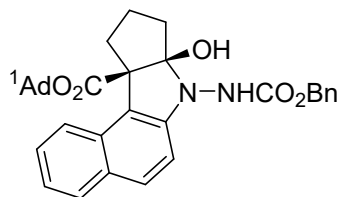

White solid, 98% yield, 95% ee, >19:1 dr, m.p. 101-105 °C,  $[\alpha]^{23}_D = -190.2$  ( $c = 0.96$ , in  $\text{CH}_2\text{Cl}_2$ ).

SFC Daicel Chiralpak IB-3,  $\text{CO}_2/\text{MeOH} = 85/15$ , 1.5 mL/min,  $\lambda = 240$  nm,  $t_1 = 9.36$  min,  $t_2 = 10.43$  min.

$^1\text{H NMR}$  (400 MHz, Acetone- $d_6$ )  $\delta$  7.66 (d,  $J = 8.2$  Hz, 1H), 7.59 (d,  $J = 8.6$  Hz, 1H), 7.28 (m, 7H), 7.09 (t,  $J = 8.0$  Hz, 1H), 6.75 (d,  $J = 8.5$  Hz, 1H), 5.10 (s, 2H), 2.95 – 2.80 (m, 1H), 2.14 (d,  $J = 7.5$  Hz, 1H), 1.93 (s, 2H), 1.91 (m, 2H), 1.90 – 1.80 (m, 7H), 1.78 – 1.71 (m, 1H), 1.62 (s, 1H), 1.46 (m, 6H).

$^{13}\text{C NMR}$  (101 MHz, Acetone- $d_6$ )  $\delta$  171.4, 147.9, 137.8, 131.0, 130.7, 130.3, 130.1, 129.6, 129.2, 129.1, 127.5, 123.0, 110.8, 81.6, 67.9, 65.5, 46.5, 42.1, 38.1, 37.0, 36.8, 31.8, 23.9.

HRMS (ESI)  $m/z$ :  $[\text{M} + \text{Na}]^+$  Calculated for  $[\text{C}_{34}\text{H}_{36}\text{N}_2\text{O}_5\text{Na}]^+$ : 575.2516 found 575.2512.

IR (neat) 3296, 2911, 1721, 1258, 1052, 808, 739  $\text{cm}^{-1}$ .

Racemate: 8.6:1 dr determined by isolate yield. The HPLC of the cis-isomer as below:

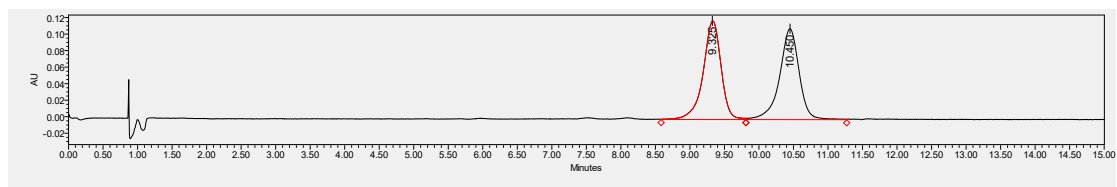

|   | Retention Time | Area    | % Area |
|---|----------------|---------|--------|
| 1 | 9.325          | 2146687 | 49.83  |
| 2 | 10.450         | 2161288 | 50.17  |

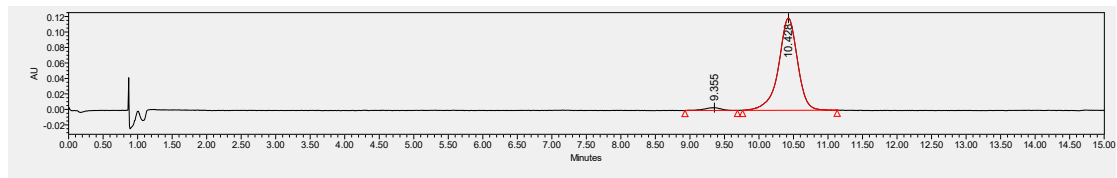

|   | Retention Time | Area    | % Area |
|---|----------------|---------|--------|
| 1 | 9.355          | 57604   | 2.47   |
| 2 | 10.428         | 2270051 | 97.53  |

**(3*R*)-adamantan-1-yl (7*aR*,10*aR*)-7*a*-hydroxy-7-((phenoxy-carbonyl)amino)-7*a*,8,9,10-tetrahydrobenzo[*e*]cyclopenta[*b*]indole-10*a*(7*H*)-carboxylate (C25):**

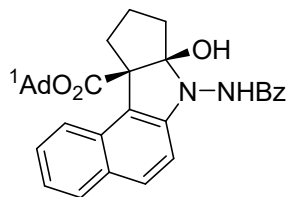

Red solid, 69% yield, 82% ee, >19:1 dr, m.p. 112-114 °C,  $[\alpha]^{25}_D = -123.0$  ( $c = 0.27$ , in  $\text{CH}_2\text{Cl}_2$ ).

SFC Daicel Chiralpak IB-3,  $\text{CO}_2/\text{MeOH} = 85/15$ , 1.5 mL/min,  $\lambda = 240$  nm,  $t_1 = 9.77$  min,  $t_2 = 15.67$  min

$^1\text{H NMR}$  (400 MHz, Acetone- $d_6$ )  $\delta$  9.81 (s, 1H), 8.00 – 7.90 (m, 2H), 7.66 (d,  $J = 8.2$  Hz, 1H), 7.57 (d,  $J = 8.6$  Hz, 1H), 7.55 – 7.49 (m, 1H), 7.43 (t,  $J = 7.5$  Hz, 2H), 7.37 – 7.27 (m, 2H), 7.13 – 7.06 (m, 1H), 6.81 (d,  $J = 8.6$  Hz, 1H), 4.75 (s, 1H), 2.91 (td,  $J = 12.4, 7.0$  Hz, 1H), 2.19 (dd,  $J = 12.6, 5.8$  Hz, 1H), 1.96 – 1.94 (m, 1H), 1.90 – 1.82 (m, 6H), 1.80 – 1.71 (m, 1H), 1.70 – 1.61 (m, 1H), 1.49 (m, 7H), 1.16 (s, 3H).

$^{13}\text{C NMR}$  (101 MHz, Acetone- $d_6$ )  $\delta$  171.3, 147.8, 133.7, 133.3, 131.0, 130.6, 130.2, 130.1, 129.7, 128.7, 127.4, 122.9, 120.5, 110.9, 109.5, 81.3, 65.6, 60.7, 42.1, 38.3, 37.0, 36.7, 31.7, 23.9.

HRMS (ESI)  $m/z$ :  $[\text{M} + \text{Na}]^+$  Calculated for  $[\text{C}_{33}\text{H}_{34}\text{N}_2\text{O}_4\text{Na}]^+$ : 545.2411 found 545.2413.

IR (neat) 3300, 2911, 2852, 1722, 1520, 1257, 1103, 809  $\text{cm}^{-1}$ .

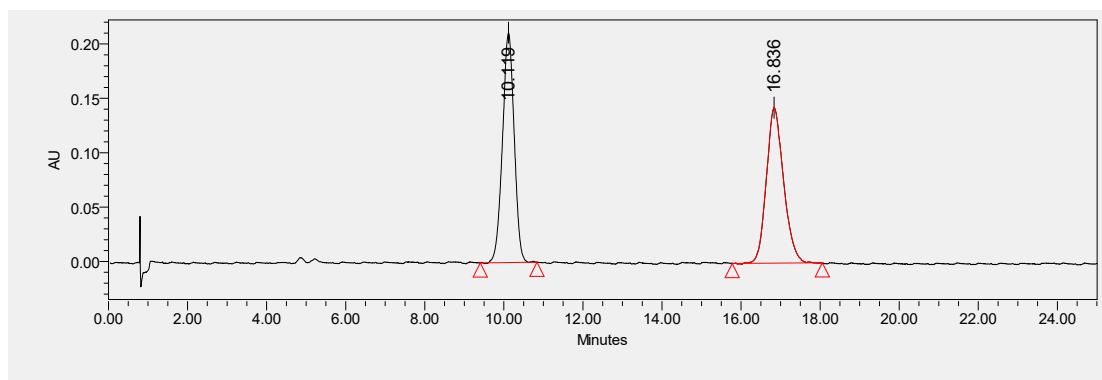

|   | Retention Time | Area    | % Area |
|---|----------------|---------|--------|
| 1 | 10.119         | 4342967 | 50.06  |
| 2 | 16.836         | 4333111 | 49.94  |

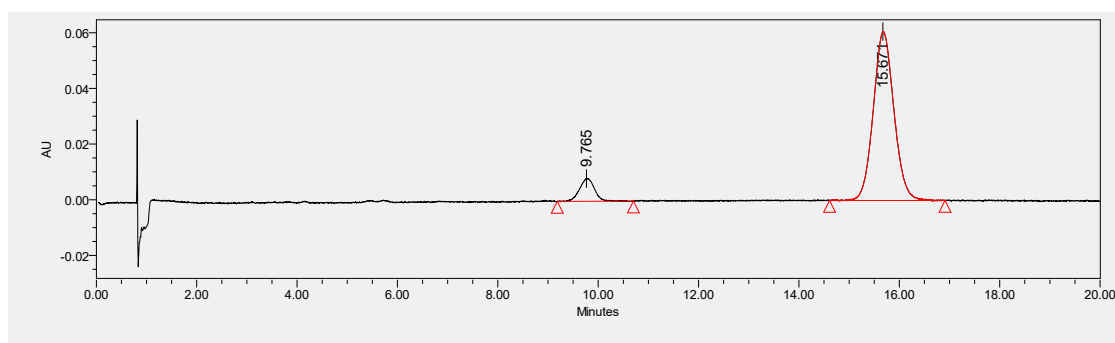

|   | Retention Time | Area    | % Area |
|---|----------------|---------|--------|
| 1 | 9.765          | 170895  | 8.99   |
| 2 | 15.671         | 1730639 | 91.01  |

**(3S,5S,7S)-adamantan-1-yl (7aR,10aR)-7a-hydroxy-7-(4-methylbenzamido)-7a,8,9,10-tetrahydrobenzo[e]cyclopenta[b]indole-10a(7H)-carboxylate (C26):**

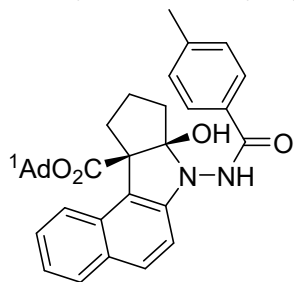

White solid, 90% yield, 93% ee, >19:1 dr, m.p. 142-145 °C,  $[\alpha]_D^{13} = 32.1$  (c = 0.20, in CH<sub>2</sub>Cl<sub>2</sub>).

SFC Daicel Chiralcel OD-3, CO<sub>2</sub>/MeOH = 85/15, 1.5 mL/min,  $\lambda = 240$  nm,  $t_1 = 6.43$  min,  $t_2 = 22.52$  min

<sup>1</sup>H NMR (400 MHz, Benzene-*d*<sub>6</sub>)  $\delta$  7.90 (d,  $J = 8.4$  Hz, 1H), 7.86 (s, 1H), 7.67 (d,  $J = 8.1$  Hz, 1H), 7.54 (m, 3H), 7.38 (t,  $J = 7.6$  Hz, 1H), 7.18 (m, 1H), 6.80 (m, 3H), 5.18 (s, 1H), 3.40 (q,  $J = 12.1$  Hz, 1H),

2.38 – 2.27 (m, 1H), 2.18 (m, 8H), 1.97 (s, 3H), 1.79 (s, 3H), 1.73 – 1.63 (m, 2H), 1.29 (q,  $J = 12.2$  Hz, 6H).

<sup>13</sup>C NMR (101 MHz, Benzene-*d*<sub>6</sub>)  $\delta$  171.1, 169.3, 147.0, 142.7, 130.7, 130.3, 129.8, 129.7, 129.6, 129.4, 127.0, 122.5, 122.5, 120.3, 110.2, 109.0, 81.6, 65.3, 45.6, 41.4, 38.1, 36.1, 35.9, 31.0, 23.4, 21.2.

HRMS (ESI)  $m/z$ :  $[M + Na]^+$  Calculated for [C<sub>34</sub>H<sub>36</sub>N<sub>2</sub>O<sub>4</sub>Na<sup>+</sup>]: 559.2567 found 559.2567.

IR (neat) 3293, 2912, 2852, 1722, 1659, 1520, 1278, 1258, 1104, 833, 748 cm<sup>-1</sup>.

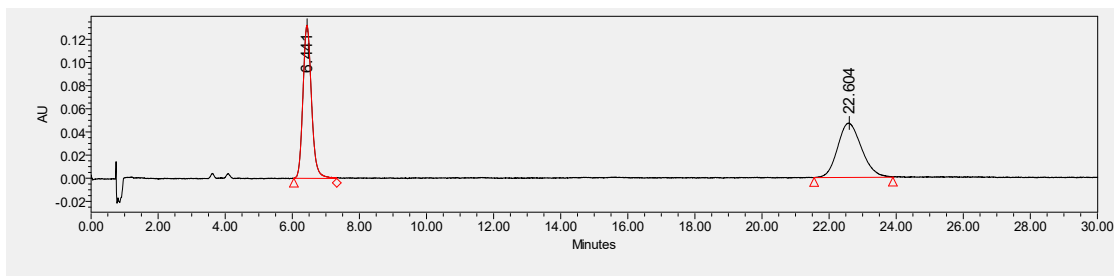

|   | Retention Time | Area    | % Area |
|---|----------------|---------|--------|
| 1 | 6.441          | 2346092 | 50.23  |
| 2 | 22.604         | 2325019 | 49.77  |

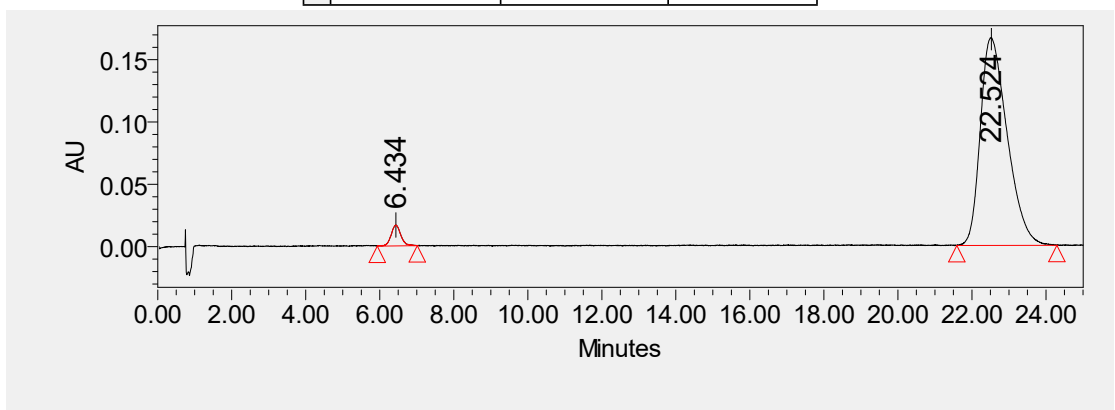

|   | Retention Time | Area    | % Area |
|---|----------------|---------|--------|
| 1 | 6.434          | 304735  | 3.50   |
| 2 | 22.524         | 8406697 | 96.50  |

(3S,5S,7S)-adamantan-1-yl

(7aR,10aR)-7-(1-naphthamido)-7a-hydroxy-7a,8,9,10-

tetrahydrobenzo[e]cyclopenta[b]indole-10a(7H)-carboxylate (C27):

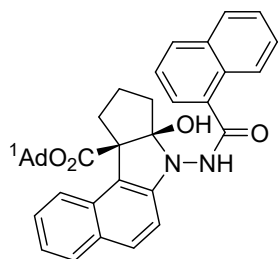

Red solid, 91% yield, 92% ee, >19:1 dr, m.p. 164-167 °C,  $[\alpha]_D^{13} = 52.1$  (c = 1.0, in CH<sub>2</sub>Cl<sub>2</sub>).

SFC Daicel Chiralcel OD-3, CO<sub>2</sub>/MeOH = 70/30, 1.5 mL/min,  $\lambda = 240$  nm,  $t_1 = 8.41$  min,  $t_2 = 21.43$  min

<sup>1</sup>H NMR (400 MHz, Benzene-*d*<sub>6</sub>)  $\delta$  7.76 (s, 1H), 7.65 (d,  $J = 8.4$  Hz, 1H), 7.44 – 7.37 (m, 2H), 7.29 (d,  $J = 8.5$  Hz, 2H), 7.26 – 7.17 (m, 3H), 7.10 (t,  $J = 7.6$  Hz, 1H), 6.98 – 6.93 (m, 2H), 6.90 (m, 1H), 6.53 (d,  $J = 8.6$  Hz, 1H), 4.85 (s, 1H), 3.15 (dq,  $J = 12.4, 7.1$  Hz, 1H), 2.05 – 1.82 (m, 9H), 1.51 (s, 3H), 1.01 (q,  $J = 12.2$  Hz, 8H).

<sup>13</sup>C NMR (101 MHz, Benzene-*d*<sub>6</sub>)  $\delta$  170.9, 169.5, 146.9, 135.4, 132.8, 130.8, 130.4, 130.0, 129.7, 129.6, 129.2, 128.8, 127.1, 126.9, 124.3, 122.7, 122.5, 120.4, 110.1, 109.1, 81.6, 65.3, 41.5, 38.2, 36.2, 35.9, 31.0, 23.4, 20.5.

HRMS (ESI)  $m/z$ :  $[M + Na]^+$  Calculated for [C<sub>37</sub>H<sub>36</sub>N<sub>2</sub>O<sub>4</sub>Na<sup>+</sup>]: 595.2567 found 595.2567.

IR (neat) 3291, 2911, 2852, 1721, 1661, 1520, 1291, 1258, 1237, 1103, 808, 760 cm<sup>-1</sup>.

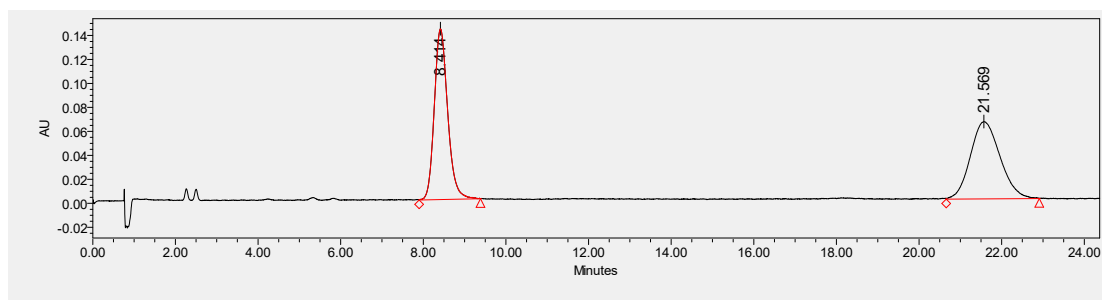

|   | Retention Time | Area    | % Area |
|---|----------------|---------|--------|
| 1 | 8.414          | 3192299 | 49.79  |
| 2 | 21.569         | 3219238 | 50.21  |

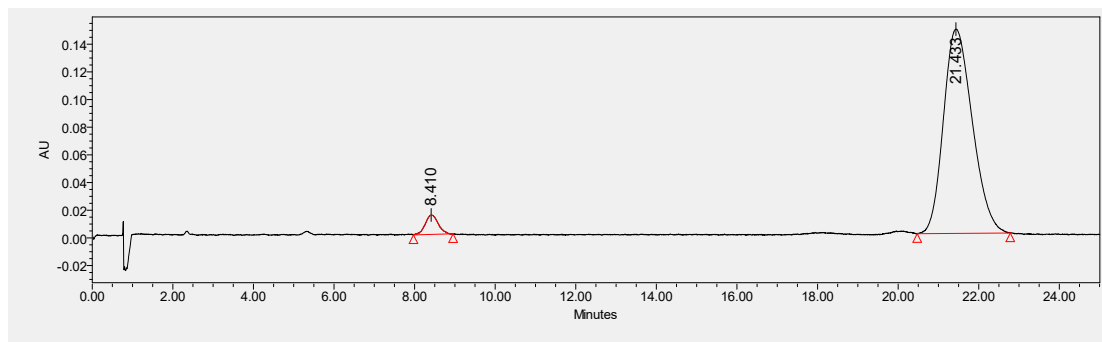

|   | Retention Time | Area    | % Area |
|---|----------------|---------|--------|
| 1 | 8.410          | 312258  | 4.07   |
| 2 | 21.433         | 7353561 | 95.93  |



**(3*R*)-adamantan-1-yl (7*aR*,10*aR*)-3-bromo-7*a*-hydroxy-7-((methoxycarbonyl)amino)-7*a*,8,9,10-tetrahydrobenzo[*e*]cyclopenta[*b*]indole-10*a*(7*H*)-carboxylate (C28):**

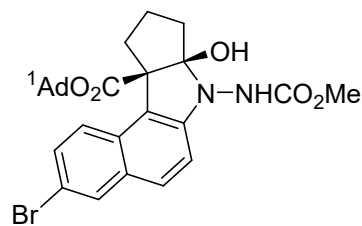

White solid, 98% yield, 95% ee, >19:1 dr, m.p. 137-141 °C,  $[\alpha]_D^{23} = -334.9$  ( $c = 0.48$ , in  $\text{CH}_2\text{Cl}_2$ ).

SFC Daicel Chiralpak IA-3,  $\text{CO}_2/\text{MeOH} = 85/15$ , 1.5 mL/min,  $\lambda = 240$  nm,  $t_1 = 8.19$  min,  $t_2 = 9.99$  min.

$^1\text{H NMR}$  (600 MHz, Benzene- $d_6$ )  $\delta$  7.79 (s, 1H), 7.60 (d,  $J = 8.3$  Hz, 1H), 7.43 (d,  $J = 8.8$  Hz, 1H), 7.24 (d,  $J = 8.5$  Hz, 1H), 6.64 (d,  $J = 6.8$  Hz, 1H), 5.97 (s, 1H), 4.63 (s, 1H), 3.31 (s, 3H), 3.25 (s, 1H), 2.15 – 1.89 (m, 9H), 1.76 (s, 3H), 1.59 (s, 1H), 1.26 (m, 7H).

$^{13}\text{C NMR}$  (151 MHz, Benzene- $d_6$ )  $\delta$  170.5, 158.5, 147.0, 131.6, 131.3, 130.3, 129.0, 128.9, 124.0, 119.9, 116.1, 110.7, 108.2, 81.9, 64.8, 52.7, 41.4, 37.6, 36.1, 35.9, 31.0, 23.2.

HRMS (ESI)  $m/z$ :  $[\text{M} + \text{Na}]^+$  Calculated for  $[\text{C}_{28}\text{H}_{31}^{79}\text{BrN}_2\text{O}_5\text{Na}^+]$ : 577.1309 found 577.1310.

HRMS (ESI)  $m/z$ :  $[\text{M} + \text{Na}]^+$  Calculated for  $[\text{C}_{28}\text{H}_{31}^{81}\text{BrN}_2\text{O}_5\text{Na}^+]$ : 579.1288 found 579.1287.

IR (neat) 3298, 2911, 1723, 1623, 1584, 1507, 1356, 1255, 1053, 813, 735  $\text{cm}^{-1}$ .

Racemate: 5.5:1 dr determined by isolate yield. The HPLC of the cis-isomer as below:

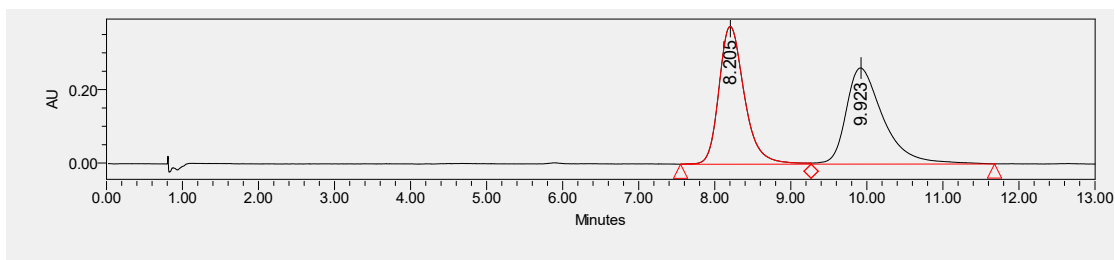

|   | Retention Time | Area    | % Area |
|---|----------------|---------|--------|
| 1 | 8.205          | 8682624 | 49.92  |
| 2 | 9.923          | 8709380 | 50.08  |

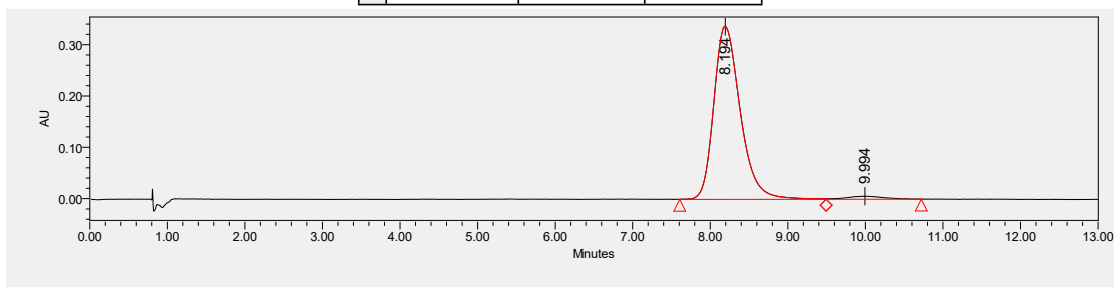

|   | Retention Time | Area    | % Area |
|---|----------------|---------|--------|
| 1 | 8.194          | 7984846 | 97.60  |
| 2 | 9.994          | 196220  | 2.40   |

**(3*R*)-adamantan-1-yl (7*aR*,10*aR*)-7*a*-hydroxy-7-((methoxycarbonyl)amino)-3-methyl-7*a*,8,9,10-tetrahydrobenzo[*e*]cyclopenta[*b*]indole-10*a*(7*H*)-carboxylate (C29):**

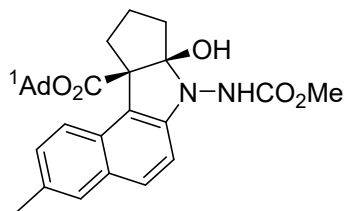

White solid, 52% yield, 76% ee, >19:1 dr, m.p. 122-124 °C,  $[\alpha]_D^{23} = -310$  ( $c = 0.53$ , in  $\text{CH}_2\text{Cl}_2$ ).

SFC Daicel Chiralpak IA-3,  $\text{CO}_2/\text{MeOH} = 85/15$ , 1.5 mL/min,  $\lambda = 240$  nm,  $t_1 = 5.75$  min,  $t_2 = 6.67$  min.

$^1\text{H NMR}$  (600 MHz, Benzene- $d_6$ )  $\delta$  7.82 (d,  $J = 7.3$  Hz, 1H), 7.52 (d,  $J = 8.4$  Hz, 1H), 7.42 (s, 1H), 7.20 (d,  $J = 8.7$  Hz, 1H), 6.78 – 6.77 (d, 1H), 6.10 (s, 1H), 4.64 (s, 1H), 3.34 (s, 4H), 2.24 (s, 3H), 2.20 (d,  $J = 11.4$  Hz, 1H), 2.16 – 2.04 (m, 7H), 2.00 (s, 1H), 1.76 (s, 3H), 1.63 (s, 1H), 1.34 – 1.18 (m, 7H).

$^{13}\text{C NMR}$  (151 MHz, Benzene- $d_6$ )  $\delta$  170.9, 158.7, 146.1, 131.7, 130.7, 129.3, 129.1, 128.8, 128.7, 122.3, 119.9, 110.0, 108.0, 81.7, 65.1, 52.6, 41.4, 37.6, 36.1, 35.9, 31.0, 23.3, 21.4.

HRMS (ESI)  $m/z$ :  $[\text{M} + \text{Na}]^+$  Calculated for  $[\text{C}_{29}\text{H}_{34}\text{N}_2\text{O}_5\text{Na}]^+$ : 513.2360 found 513.2361.

IR (neat) 3297, 2912, 1724, 1603, 1580, 1237, 1054, 815  $\text{cm}^{-1}$ .

Racemate: 11:1 dr determined by isolate yield. The HPLC of the cis-isomer as below:

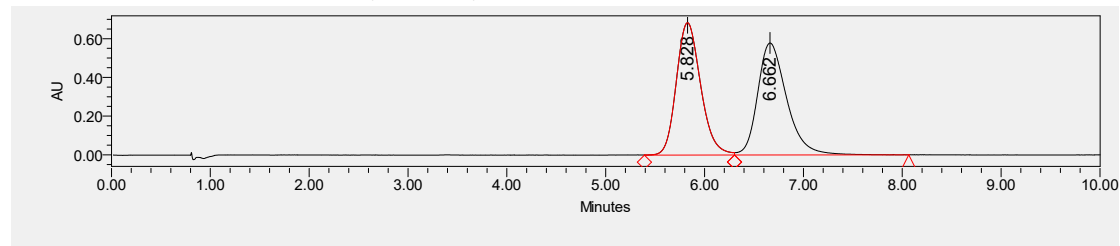

|   | Retention Time | Area     | % Area |
|---|----------------|----------|--------|
| 1 | 5.828          | 11693415 | 49.76  |
| 2 | 6.662          | 11804386 | 50.24  |

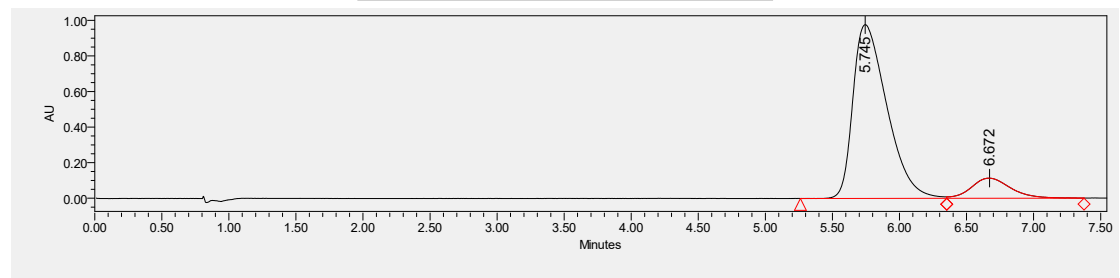

|   | Retention Time | Area     | % Area |
|---|----------------|----------|--------|
| 1 | 5.745          | 17167014 | 88.16  |
| 2 | 6.672          | 2306161  | 11.84  |

**(3*R*)-adamantan-1-yl (7*aR*,10*aR*)-7*a*-hydroxy-7-((methoxycarbonyl)amino)-2-phenyl-7*a*,8,9,10-tetrahydrobenzo[*e*]cyclopenta[*b*]indole-10*a*(7*H*)-carboxylate (C30):**

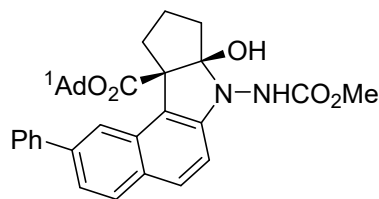

White solid, 94% yield, 84% ee, >19:1 dr, m.p. 128-133 °C,  $[\alpha]_D^{25} = -99.5$  ( $c = 1.15$ , in  $\text{CH}_2\text{Cl}_2$ ).

SFC Daicel Chiralpak IA-3,  $\text{CO}_2/\text{MeOH} = 85/15$ , 1.5 mL/min,  $\lambda = 240$  nm,  $t_1 = 10.92$  min,  $t_2 = 12.73$  min.

$^1\text{H NMR}$  (400 MHz, Acetone- $d_6$ )  $\delta$  7.75 (d,  $J = 8.5$  Hz, 1H), 7.67 – 7.55 (m, 4H), 7.41 (dd,  $J = 8.5, 1.7$  Hz, 1H), 7.37 (t,  $J = 7.7$  Hz, 2H), 7.25 (t,  $J = 7.4$  Hz, 1H), 6.77 (d,  $J = 8.6$  Hz, 1H), 3.62 (s, 3H), 2.89 (q,  $J = 11.7$  Hz, 1H), 2.23 – 2.10 (m, 1H), 1.95 (s, 1H), 1.87 (m, 9H), 1.75 (m, 1H), 1.62 (s, 1H), 1.42 (q,  $J = 12.3$  Hz, 6H), 1.15 (s, 1H).

$^{13}\text{C NMR}$  (101 MHz, Acetone- $d_6$ )  $\delta$  171.4, 148.3, 142.2, 139.8, 131.1, 130.7, 130.0, 129.9, 128.4, 128.0, 122.3, 122.3, 120.5, 120.2, 110.8, 108.5, 81.6, 65.4, 53.1, 42.0, 38.0, 36.8, 31.6, 23.8.

HRMS (ESI)  $m/z$ :  $[\text{M} + \text{Na}]^+$  Calculated for  $[\text{C}_{34}\text{H}_{36}\text{N}_2\text{O}_5\text{Na}]^+$ : 575.2516 found 575.2518.

IR (neat) 3298, 2911, 2853, 1724, 1627, 1516, 1457, 1371, 1247, 1104, 879, 758, 698  $\text{cm}^{-1}$ .

Racemate: 11:1 dr determined by isolate yield. The HPLC of the cis-isomer as below:

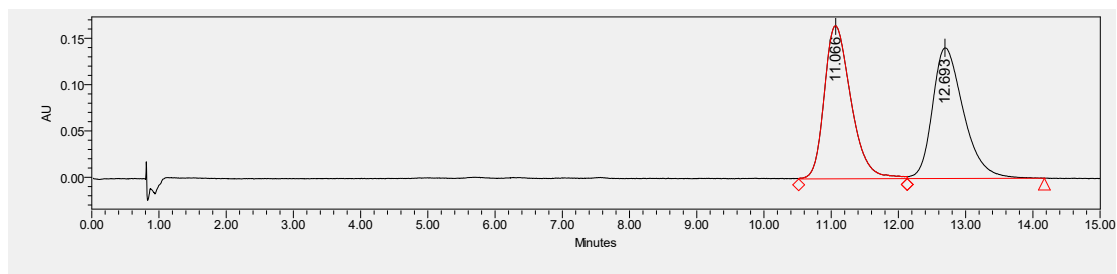

|   | Retention Time | Area    | % Area |
|---|----------------|---------|--------|
| 1 | 11.066         | 4557569 | 50.20  |
| 2 | 12.693         | 4520778 | 49.80  |

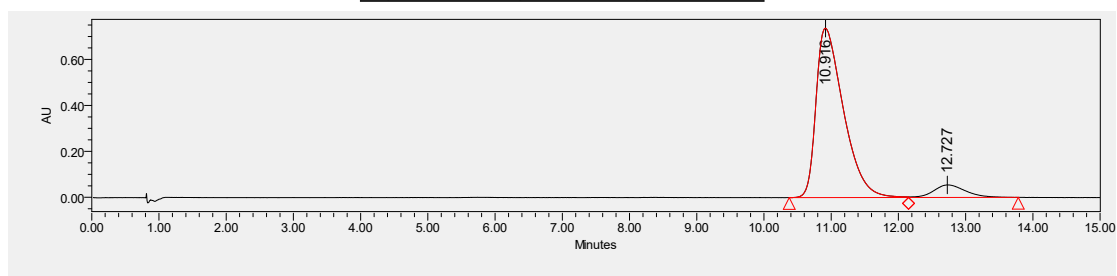

|   | Retention Time | Area     | % Area |
|---|----------------|----------|--------|
| 1 | 10.916         | 20860056 | 92.06  |
| 2 | 12.727         | 1798158  | 7.94   |

**(3*R*)-adamantan-1-yl (7*aR*,10*aR*)-2-bromo-7*a*-hydroxy-7-((methoxycarbonyl)amino)-7*a*,8,9,10-tetrahydrobenzo[*e*]cyclopenta[*b*]indole-10*a*(7*H*)-carboxylate (C31):**

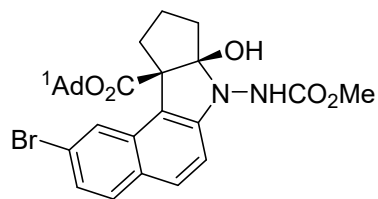

White solid, 92% yield, 87% ee, >19:1 dr, m.p. 230-235 °C, [ $\alpha$ ]<sub>D</sub><sup>20</sup> = -90.0 (c = 0.69, in CH<sub>2</sub>Cl<sub>2</sub>).

SFC Daicel Chiralpak IA-3, CO<sub>2</sub>/MeOH = 85/15, 1.5 mL/min,  $\lambda$  = 240 nm, t<sub>1</sub> = 8.30 min, t<sub>2</sub> = 9.49 min.

<sup>1</sup>H NMR (400 MHz, Acetone-*d*<sub>6</sub>)  $\delta$  7.63 (d, *J* = 8.7 Hz, 2H), 7.50 (s, 1H), 7.19 (dd, *J* = 8.7, 1.9 Hz, 1H), 6.80 (d, *J* = 8.7 Hz, 1H), 3.62 (s, 3H), 2.94 – 2.80 (m, 1H), 2.14 (d, *J* = 8.2 Hz, 1H), 1.96 (s, 3H), 1.88 (d, *J* = 10.7 Hz, 8H), 1.76 (m, 1H), 1.68 – 1.60 (m, 1H), 1.47 (d, *J* = 14.8 Hz, 6H).

<sup>13</sup>C NMR (101 MHz, Acetone-*d*<sub>6</sub>)  $\delta$  171.3, 149.0, 132.3, 132.2, 130.7, 129.0, 125.2, 121.6, 111.4, 108.9, 82.0, 65.3, 53.3, 42.2, 38.0, 37.1, 31.9, 23.9, 18.4.

HRMS (ESI) *m/z*: [M + Na]<sup>+</sup> Calculated for [C<sub>28</sub>H<sub>31</sub><sup>79</sup>BrN<sub>2</sub>O<sub>5</sub>Na<sup>+</sup>]: 577.1309 found 577.1306.

HRMS (ESI) *m/z*: [M + Na]<sup>+</sup> Calculated for [C<sub>28</sub>H<sub>31</sub><sup>81</sup>BrN<sub>2</sub>O<sub>5</sub>Na<sup>+</sup>]: 579.1288 found 579.1285.

IR (neat) 3283, 2916, 1719, 1621, 1509, 1455, 1378, 1262, 1055, 828, 797 cm<sup>-1</sup>.

Racemate: 7:1 dr determined by isolate yield. The HPLC of the cis-isomer as below:

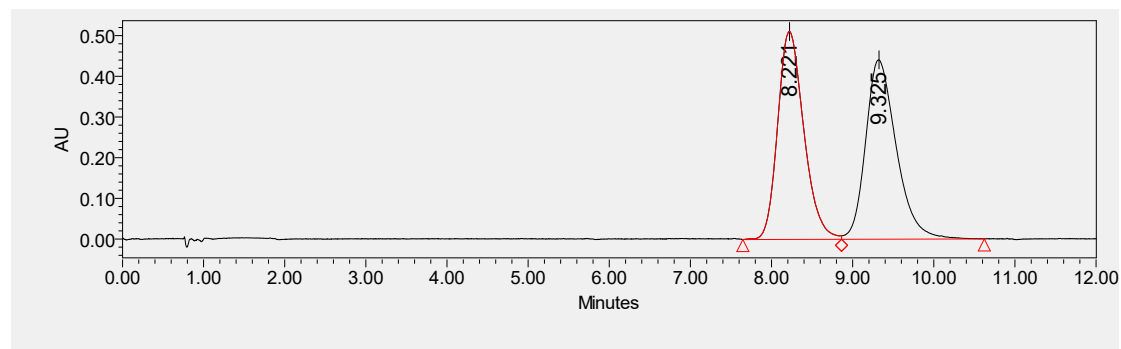

|   | Retention Time | Area     | % Area |
|---|----------------|----------|--------|
| 1 | 8.221          | 11447276 | 49.70  |
| 2 | 9.325          | 11583308 | 50.30  |

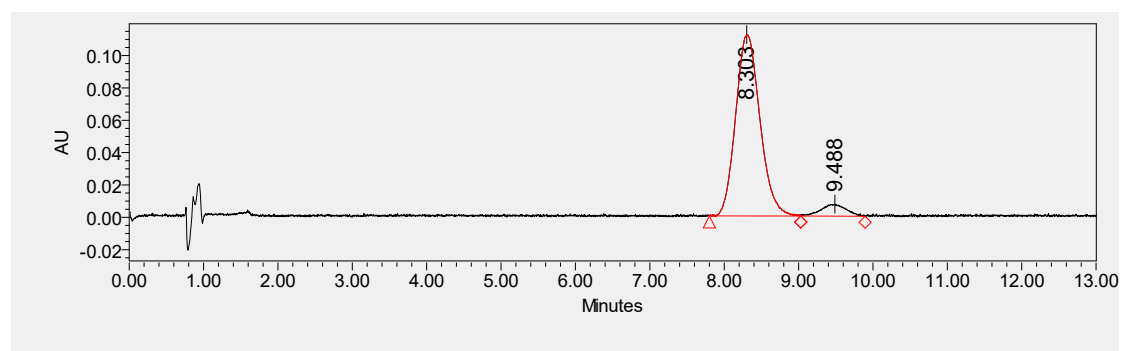

|   | Retention Time | Area    | % Area |
|---|----------------|---------|--------|
| 1 | 8.303          | 2539424 | 93.56  |
| 2 | 9.488          | 174698  | 6.44   |

(3S,5S,7S)-adamantan-1-yl

(7aR,10aR)-7-((methoxycarbonyl)amino)-7a-

((trimethylsilyl)oxy)-7a,8,9,10-tetrahydrobenzo[e]cyclopenta[b]indole-10a(7H)-carboxylate

(D1):

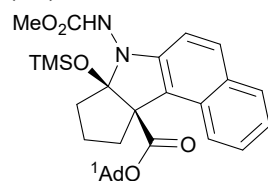

White solid, 86% yield, 92% ee, >19:1 dr, m.p. 187-189 °C,  $[\alpha]_D^{13} = 51.0$  (c = 0.70, in CH<sub>2</sub>Cl<sub>2</sub>).

SFC Daicel Chiralcel OD-3, CO<sub>2</sub>/MeOH = 95/5, 1.5 mL/min,  $\lambda = 240$  nm,  $t_1 = 7.46$  min,  $t_2 = 8.47$  min.

<sup>1</sup>H NMR (400 MHz, Benzene-*d*<sub>6</sub>)  $\delta$  7.66 (dd,  $J = 11.6, 8.5$  Hz, 2H), 7.52 (d,  $J = 8.6$  Hz, 1H), 7.33 (t,  $J = 7.6$  Hz, 1H), 7.19 (m, 1H), 6.90 (d,  $J = 7.9$  Hz, 1H), 6.42 (s, 1H), 3.47 (s, 3H), 3.19 (s, 1H), 2.66 (s, 1H), 2.14 – 1.98 (m, 8H), 1.83 (s, 3H), 1.66 (m, 1H), 1.34 (q,  $J = 12.0$  Hz, 7H), 0.32 (s, 9H).

<sup>13</sup>C NMR (101 MHz, Benzene-*d*<sub>6</sub>)  $\delta$  168.9, 145.6, 127.7, 127.6, 126.7, 124.4, 121.9, 120.8, 119.1, 109.7, 108.3, 78.7, 64.7, 50.5, 39.6, 34.6, 34.4, 29.1, 22.5, 0.2.

HRMS (ESI)  $m/z$ :  $[M + Na]^+$  Calculated for  $[C_{31}H_{40}N_2O_5SiNa]^+$ : 571.2599 found 571.2601.

IR (neat) 3287, 2912, 2852, 1716, 1520, 1354, 1317, 1259, 1238, 1149, 897, 843 cm<sup>-1</sup>.

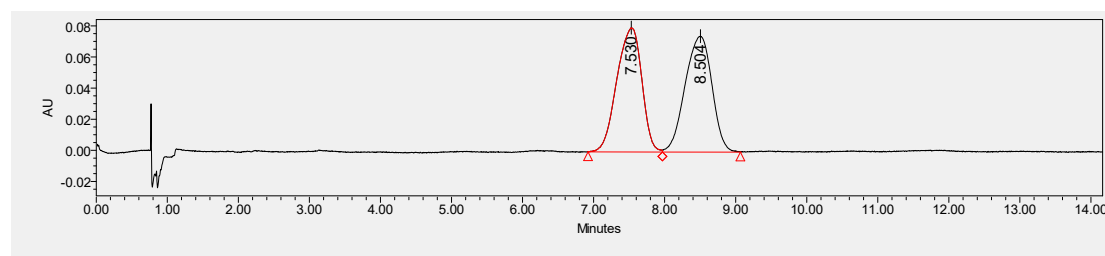

|   | Retention Time | Area    | % Area |
|---|----------------|---------|--------|
| 1 | 7.530          | 1946010 | 49.91  |
| 2 | 8.504          | 1953312 | 50.09  |

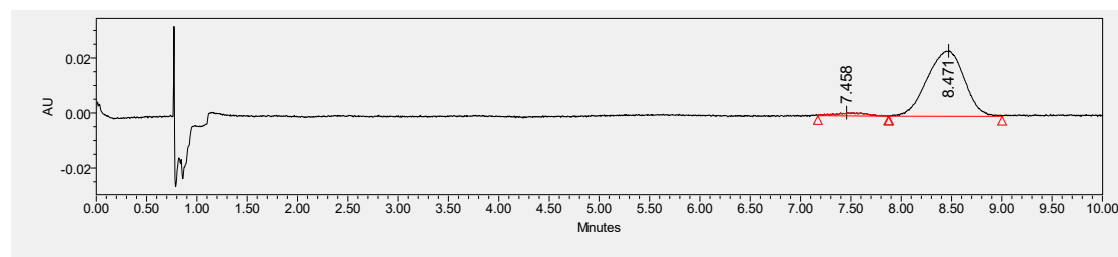

|   | Retention Time | Area   | % Area |
|---|----------------|--------|--------|
| 1 | 7.458          | 24544  | 3.87   |
| 2 | 8.471          | 609340 | 96.13  |

**(7aR,12aS)-12a-(hydroxymethyl)-7-(methylamino)-12,12a-dihydrobenzo[e]indeno[1,2-b]indol-7a(7H)-ol (D2):**

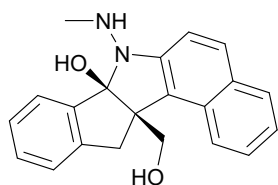

Pale yellow solid, 38% yield, 88% ee, >19:1 dr, m.p. 98-101 °C,  $[\alpha]_D^{25} = -295.7$  ( $c = 0.08$ , in  $\text{CH}_2\text{Cl}_2$ ).

**HPLC** Daicel Chiralpak AZH, hexane/isopropanol= 70/30, 1.0 mL/min,  $\lambda = 254$  nm,  $t_1 = 14.32$  min,  $t_2 = 16.25$  min.

**$^1\text{H NMR}$**  (600 MHz, Chloroform- $d$ )  $\delta$  7.86 (d,  $J = 8.4$  Hz, 1H), 7.78 (d,  $J = 8.2$  Hz, 1H), 7.69 (d,  $J = 8.7$  Hz, 1H), 7.54 (d,  $J = 7.5$  Hz, 1H), 7.46 (t,  $J = 7.5$  Hz, 1H), 7.32 – 7.27 (m, 2H), 7.22 (m, 3H), 5.17 (s, 1H), 4.49 (d,  $J = 11.2$  Hz, 1H), 3.76 – 3.63 (m, 2H), 3.34 (d,  $J = 16.4$  Hz, 1H), 2.96 (s, 3H), 2.27 (s, 2H).

**$^{13}\text{C NMR}$**  (151 MHz, Chloroform- $d$ )  $\delta$  150.8, 141.9, 141.8, 130.8, 130.3, 129.6, 128.4, 127.6, 126.6, 125.8, 125.3, 122.8, 121.6, 120.7, 78.8, 67.2, 59.6, 40.5, 37.1.

**HRMS** (ESI)  $m/z$ :  $[\text{M} + \text{Na}]^+$  Calculated for  $[\text{C}_{21}\text{H}_{20}\text{N}_2\text{O}_2\text{Na}]^+$ : 355.1417 found 355.1414.

**IR** (neat) 3334, 2924, 1720, 1622, 1518, 1467, 1375, 1209, 1027, 815, 746  $\text{cm}^{-1}$ .

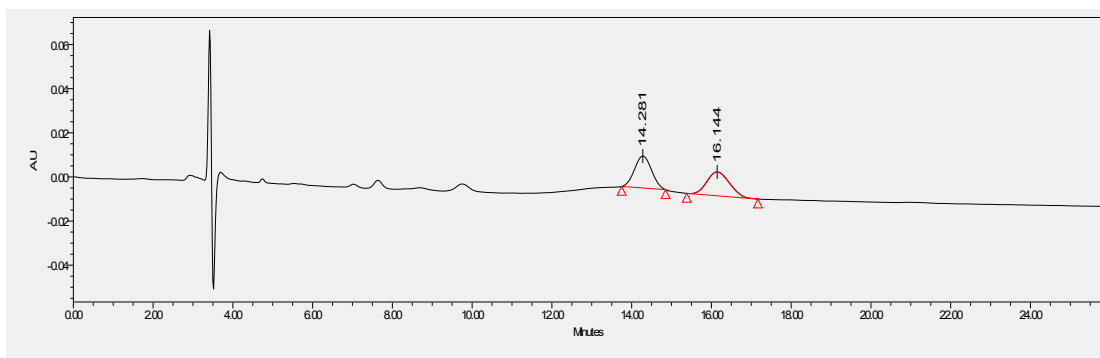

|   | Retention Time | Area   | % Area |
|---|----------------|--------|--------|
| 1 | 14.281         | 431109 | 50.39  |
| 2 | 16.144         | 424405 | 49.61  |

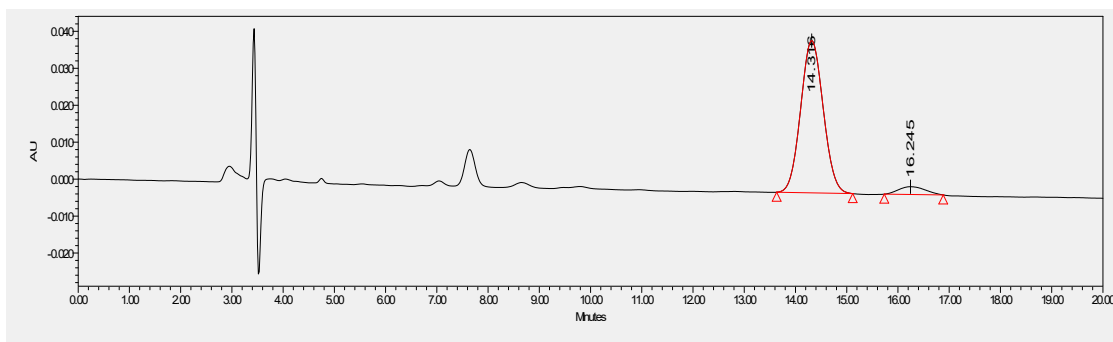

|   | Retention Time | Area    | % Area |
|---|----------------|---------|--------|
| 1 | 14.316         | 1259195 | 94.23  |
| 2 | 16.245         | 77071   | 5.77   |

# 11. Copies of $^1\text{H}$ , $^{13}\text{C}$ and $^{19}\text{F}$ NMR spectra of the products

C1:

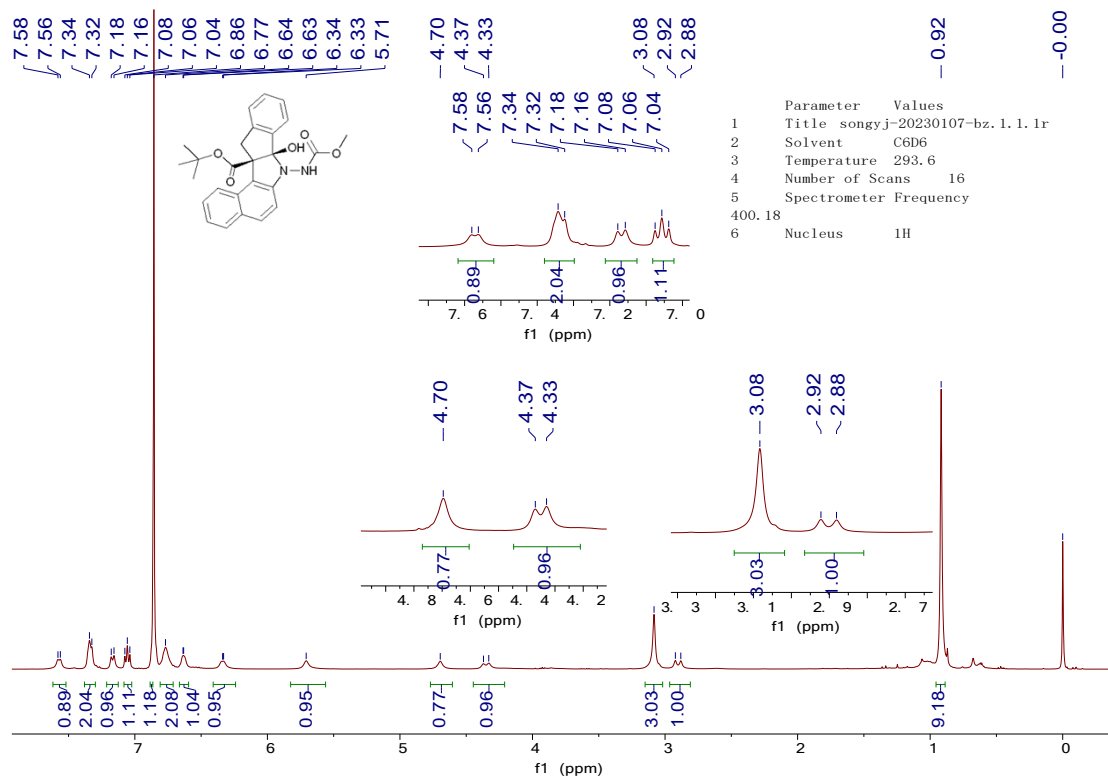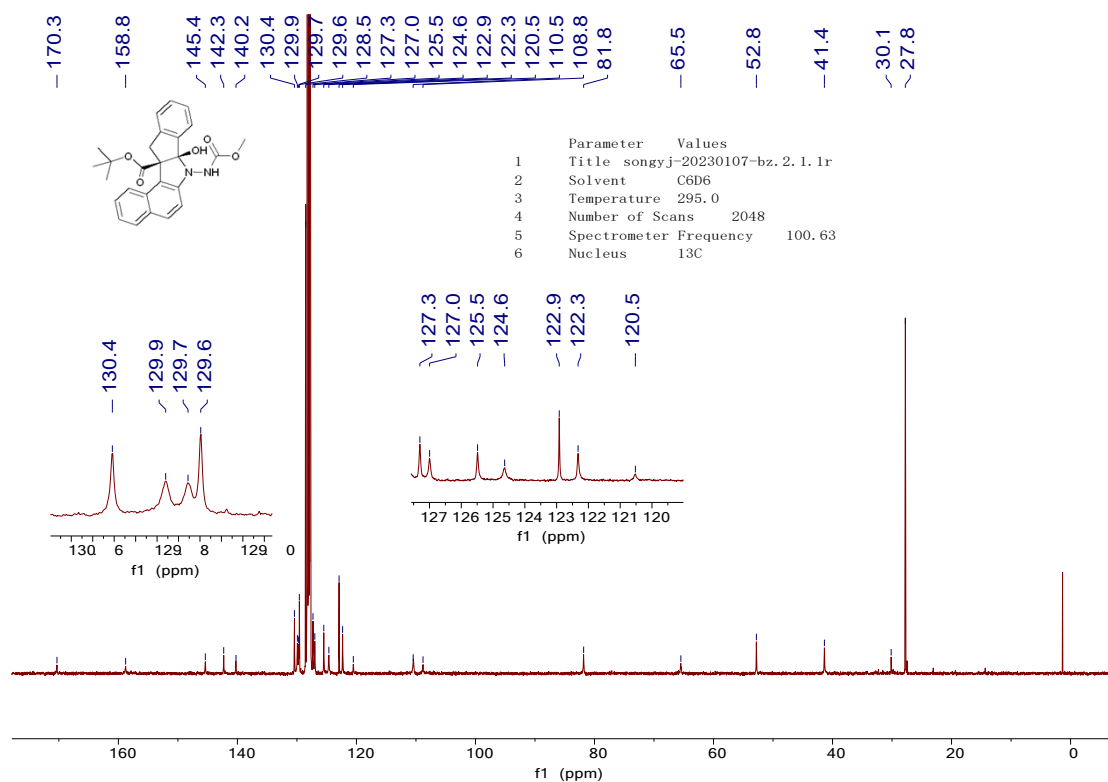

C2:

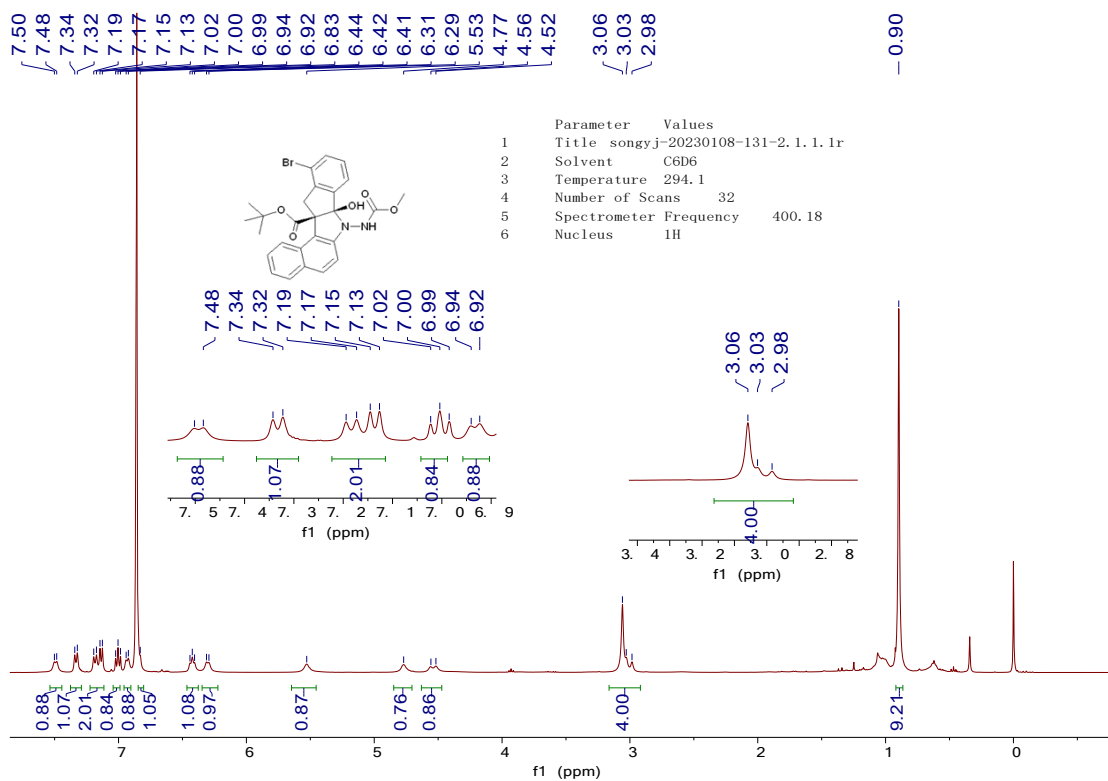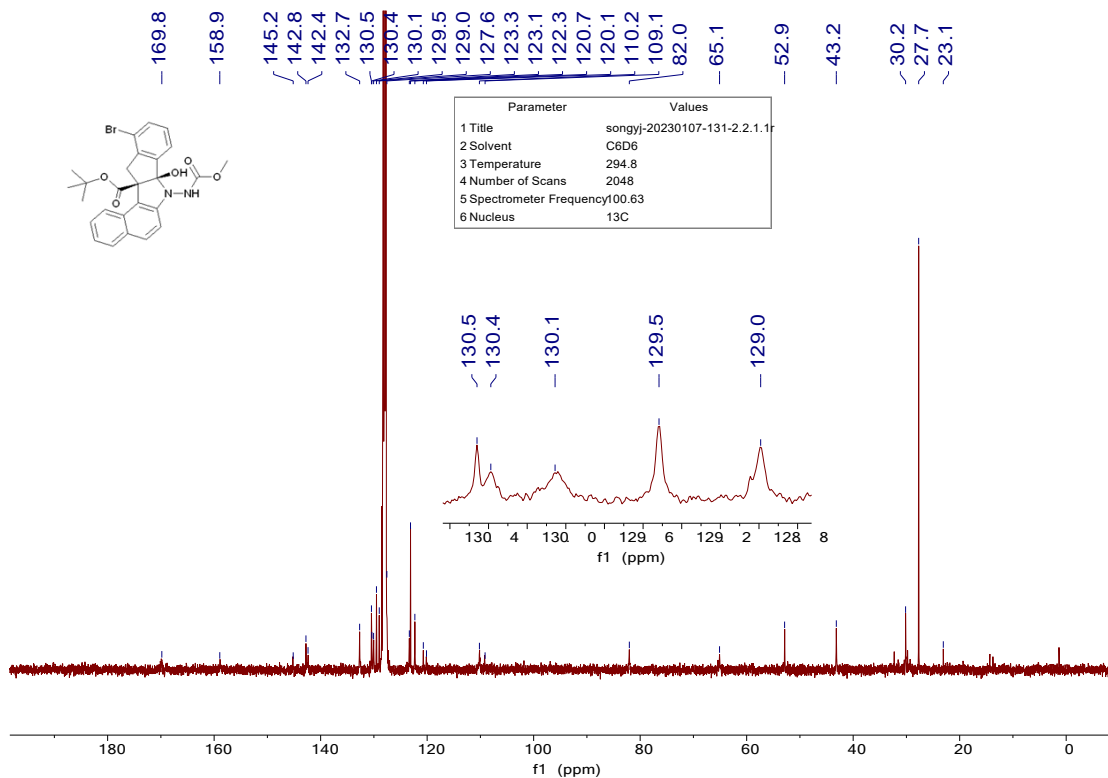



C3:

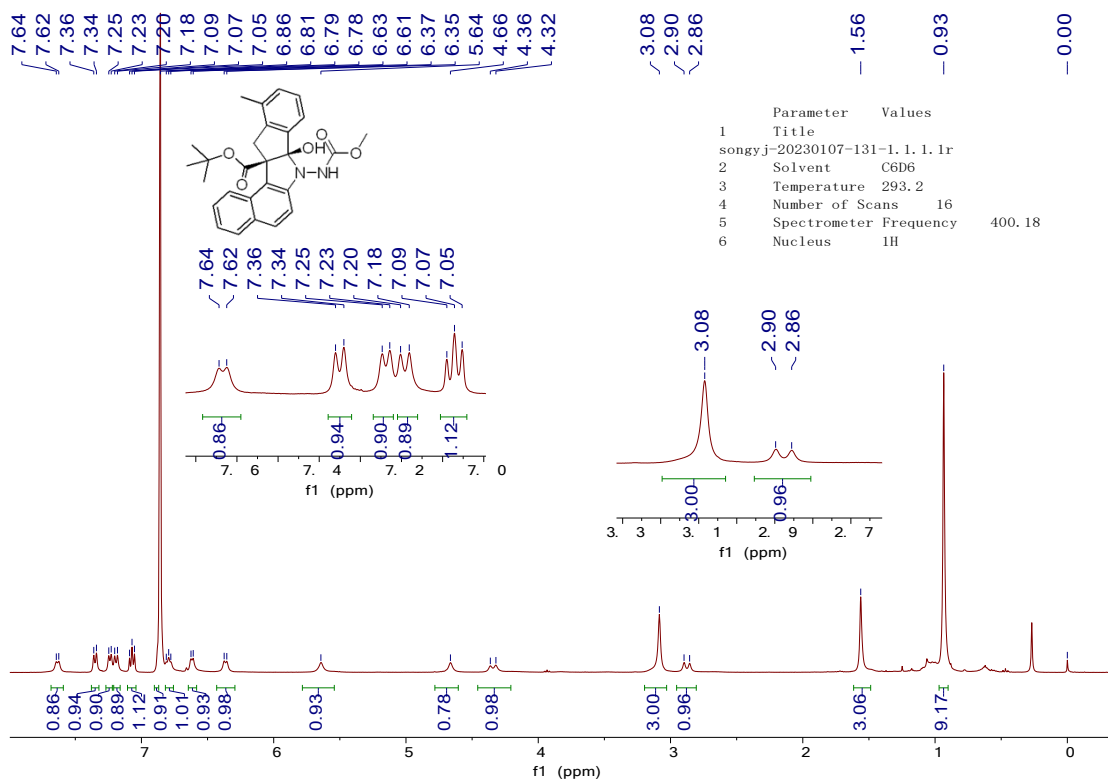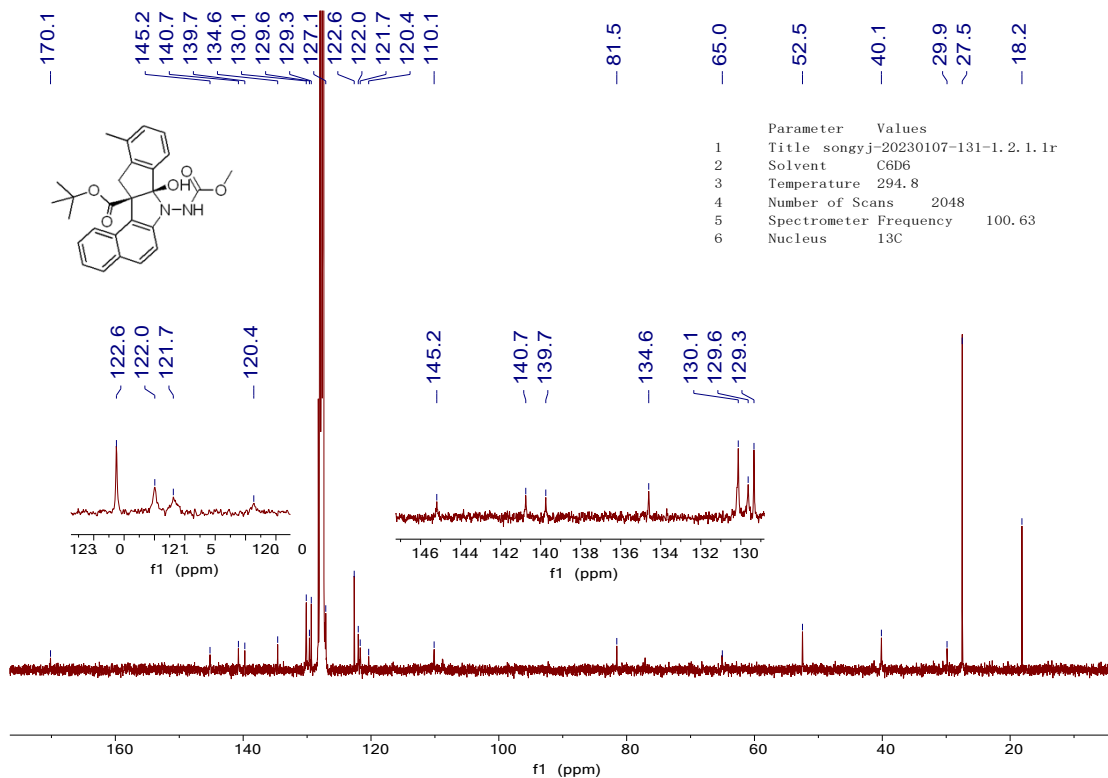

C4:

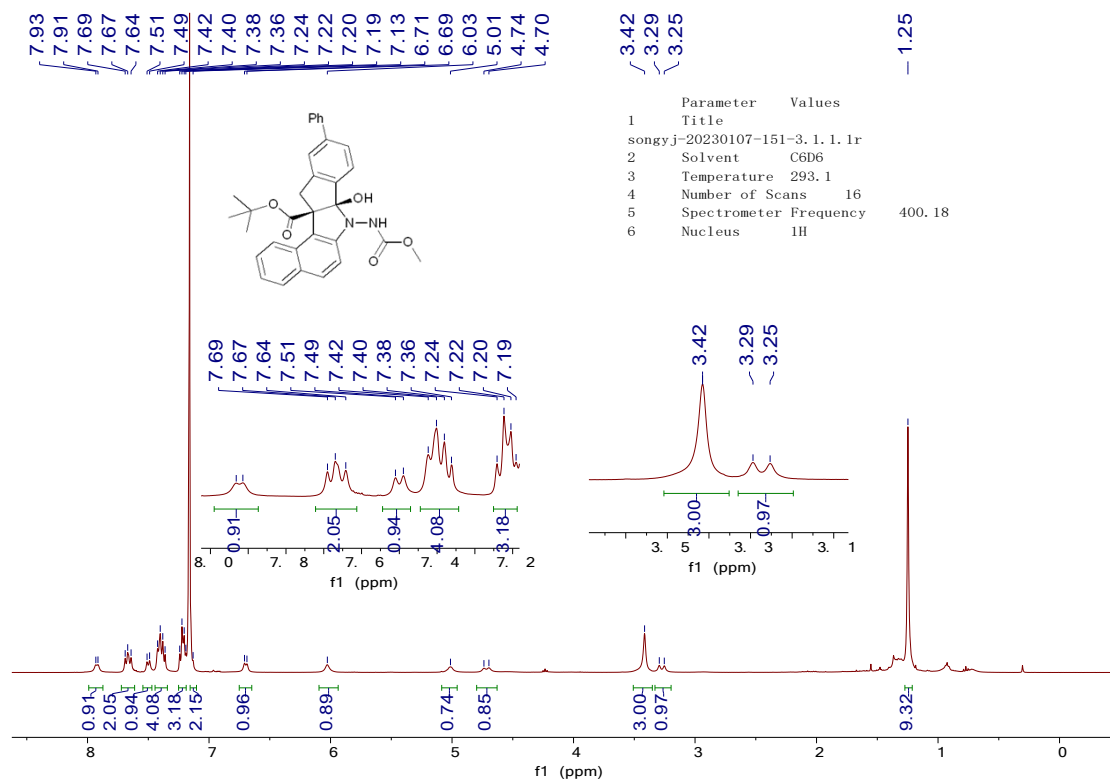

| Parameter                | Values                       |
|--------------------------|------------------------------|
| 1 Title                  | songyj-20230107-151-3.1.1.1r |
| 2 Solvent                | C6D6                         |
| 3 Temperature            | 293.1                        |
| 4 Number of Scans        | 16                           |
| 5 Spectrometer Frequency | 400.18                       |
| 6 Nucleus                | <sup>1</sup> H               |

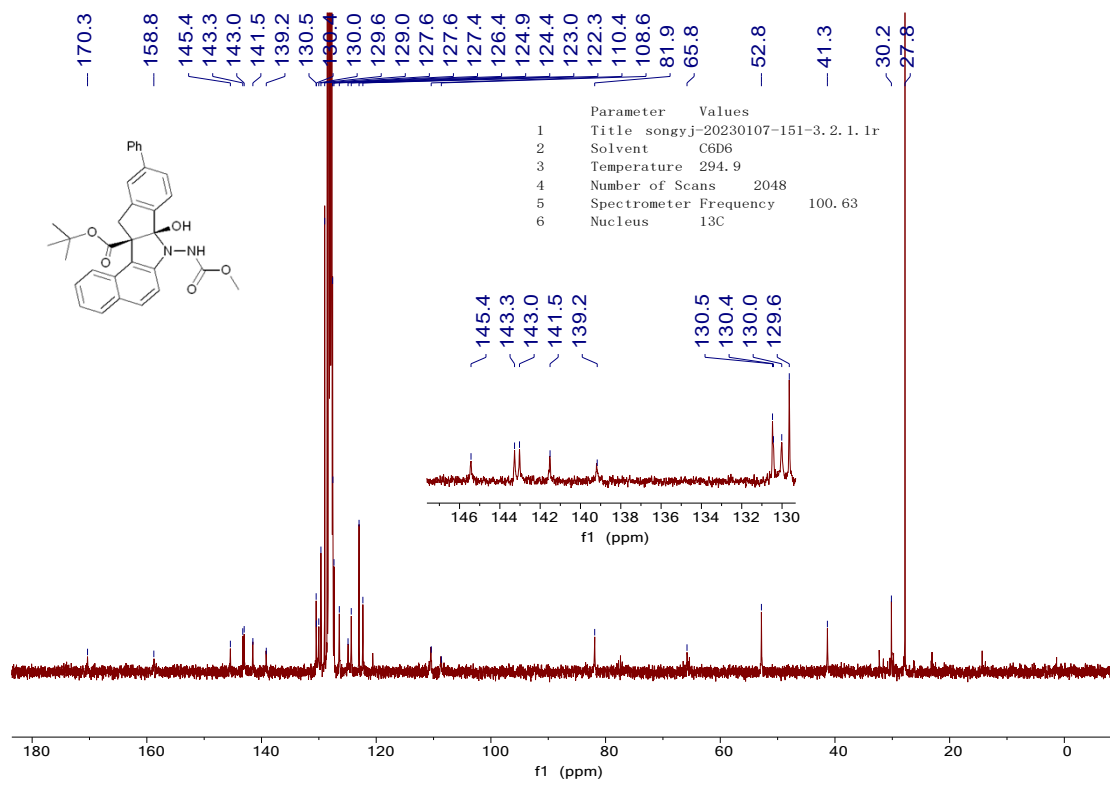

| Parameter                | Values                       |
|--------------------------|------------------------------|
| 1 Title                  | songyj-20230107-151-3.2.1.1r |
| 2 Solvent                | C6D6                         |
| 3 Temperature            | 294.9                        |
| 4 Number of Scans        | 2048                         |
| 5 Spectrometer Frequency | 100.63                       |
| 6 Nucleus                | <sup>13</sup> C              |

C5:

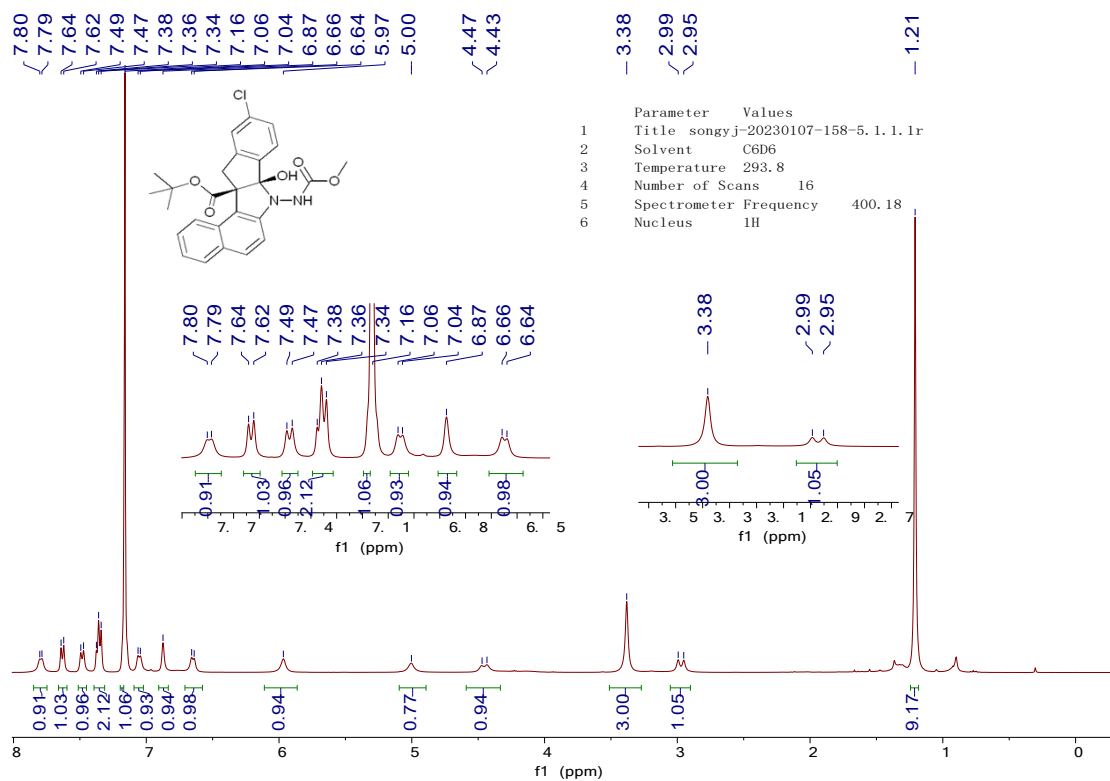

| Parameter | Values                             |
|-----------|------------------------------------|
| 1         | Title songyj-20230107-158-5.1.1.1r |
| 2         | Solvent CDCl3                      |
| 3         | Temperature 293.8                  |
| 4         | Number of Scans 16                 |
| 5         | Spectrometer Frequency 400.18      |
| 6         | Nucleus 1H                         |

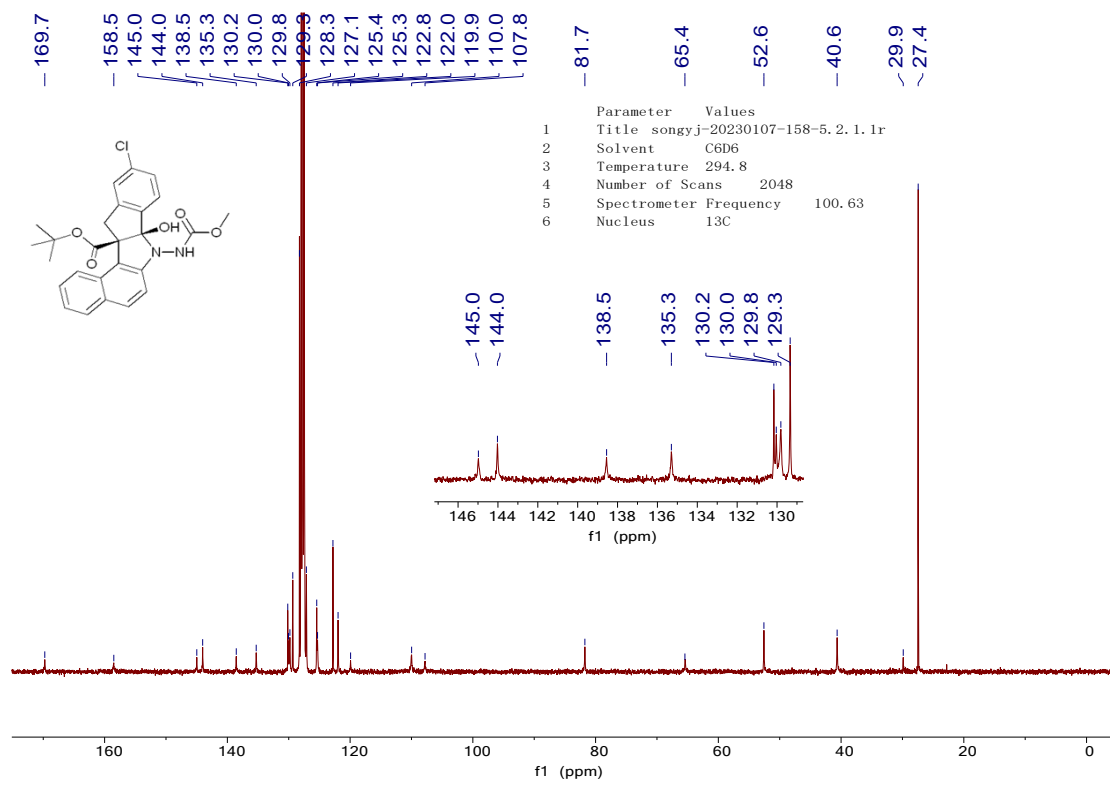

| Parameter | Values                             |
|-----------|------------------------------------|
| 1         | Title songyj-20230107-158-5.2.1.1r |
| 2         | Solvent CDCl3                      |
| 3         | Temperature 294.8                  |
| 4         | Number of Scans 2048               |
| 5         | Spectrometer Frequency 100.63      |
| 6         | Nucleus 13C                        |

C6:

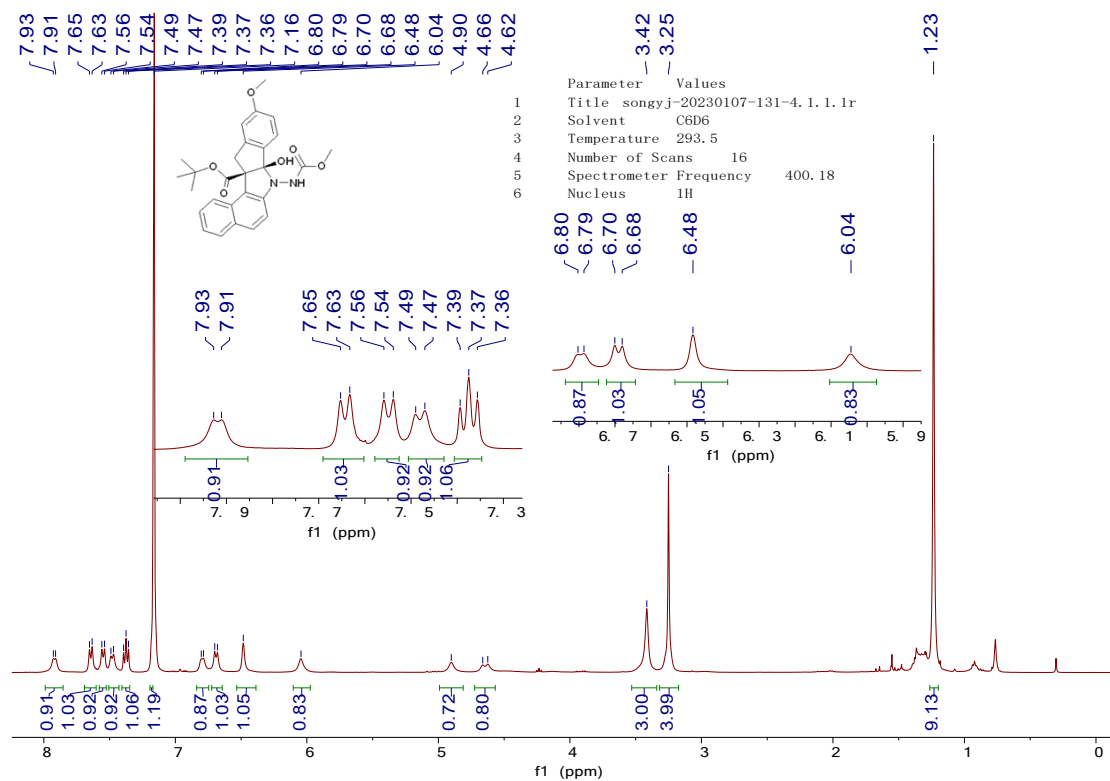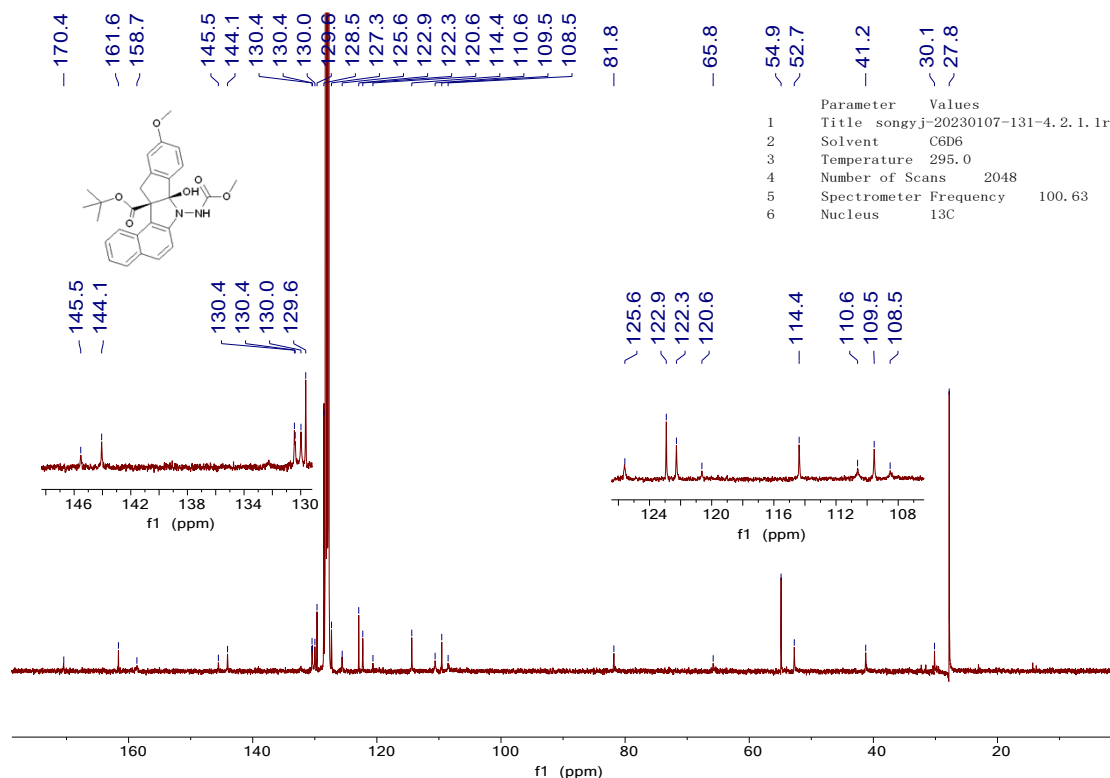



C8:

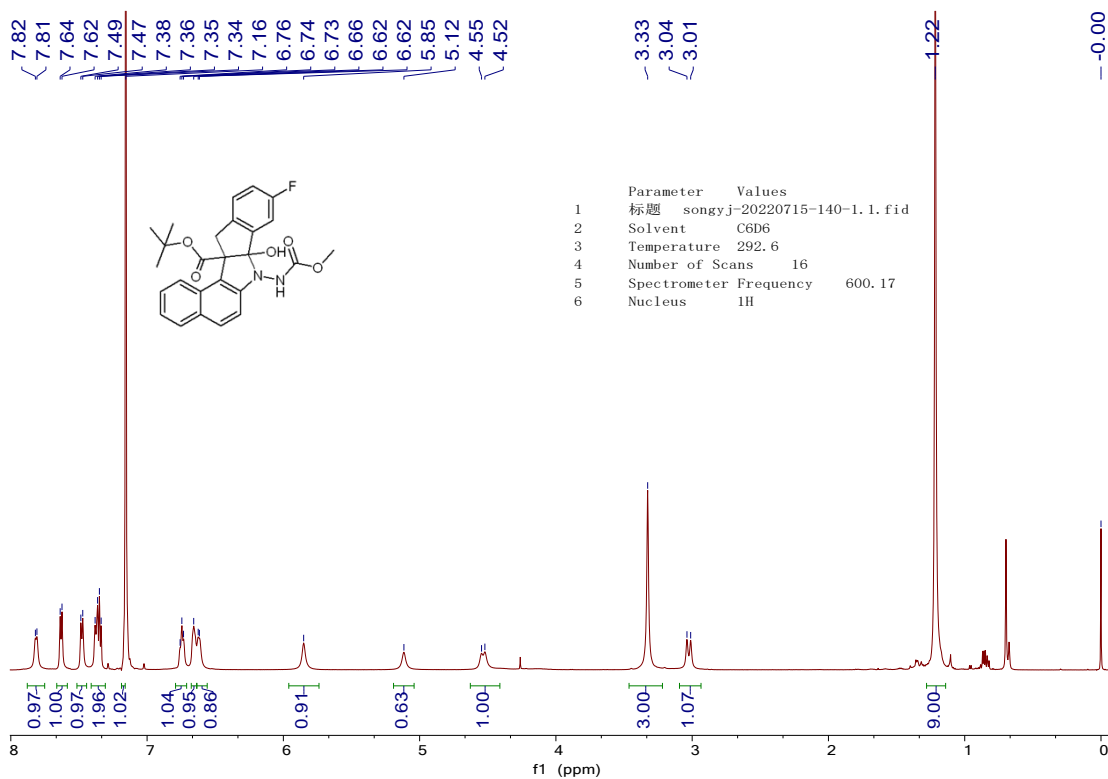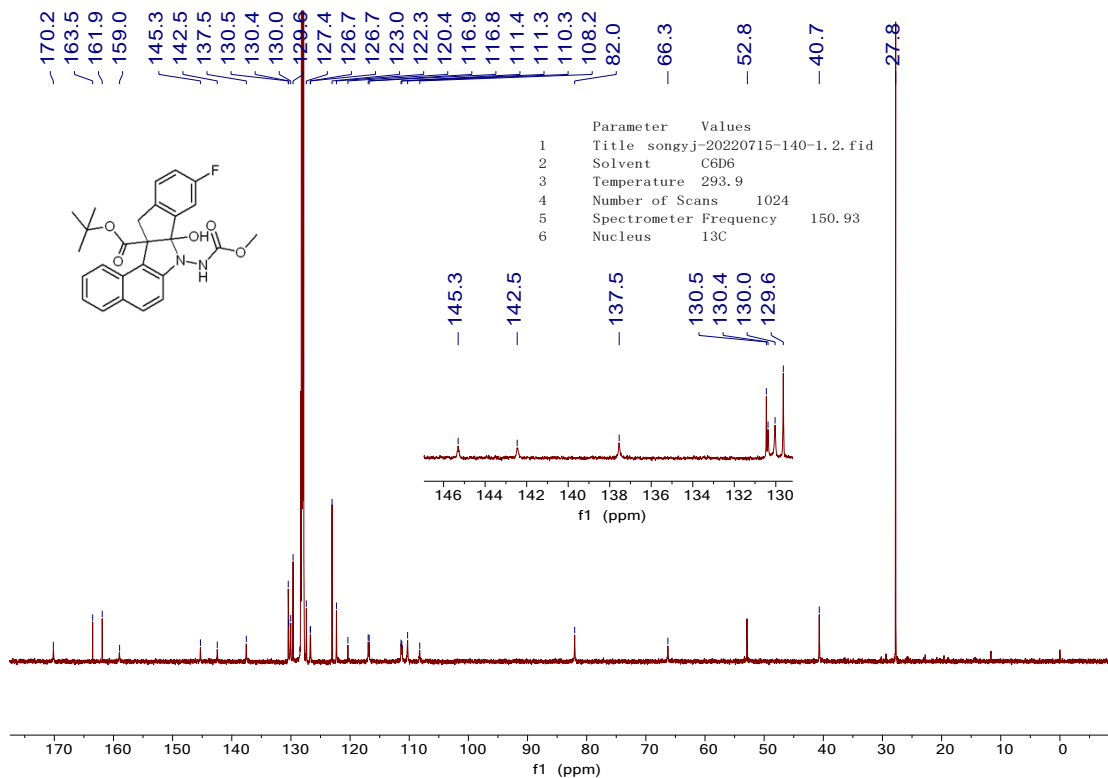

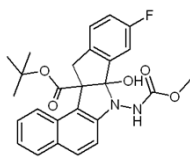

-116.01

| Parameter | Values                             |
|-----------|------------------------------------|
| 1         | Title as-20220716-SYJ-140-1.2.1.1r |
| 2         | Solvent C6D6                       |
| 3         | Temperature 293.0                  |
| 4         | Number of Scans 32                 |
| 5         | Spectrometer Frequency 564.72      |
| 6         | Nucleus 19F                        |

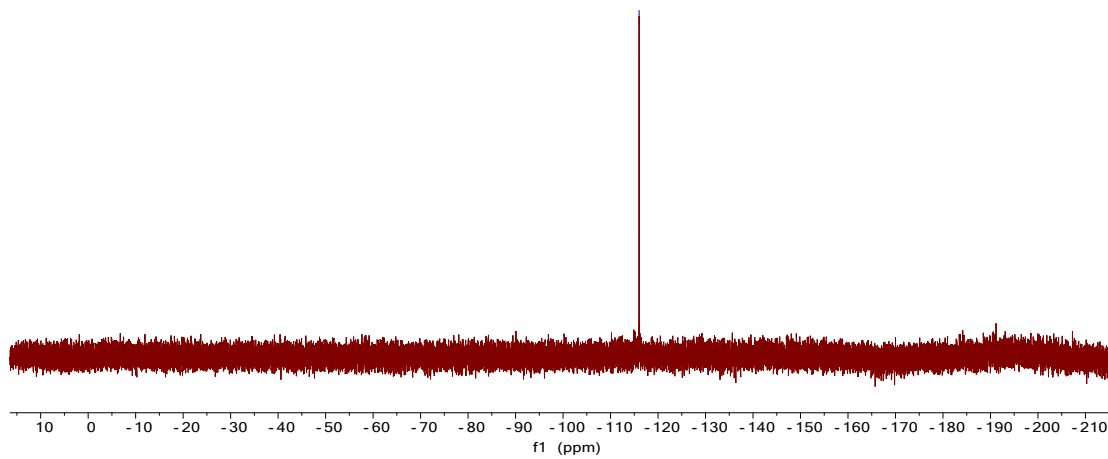







**C11:**

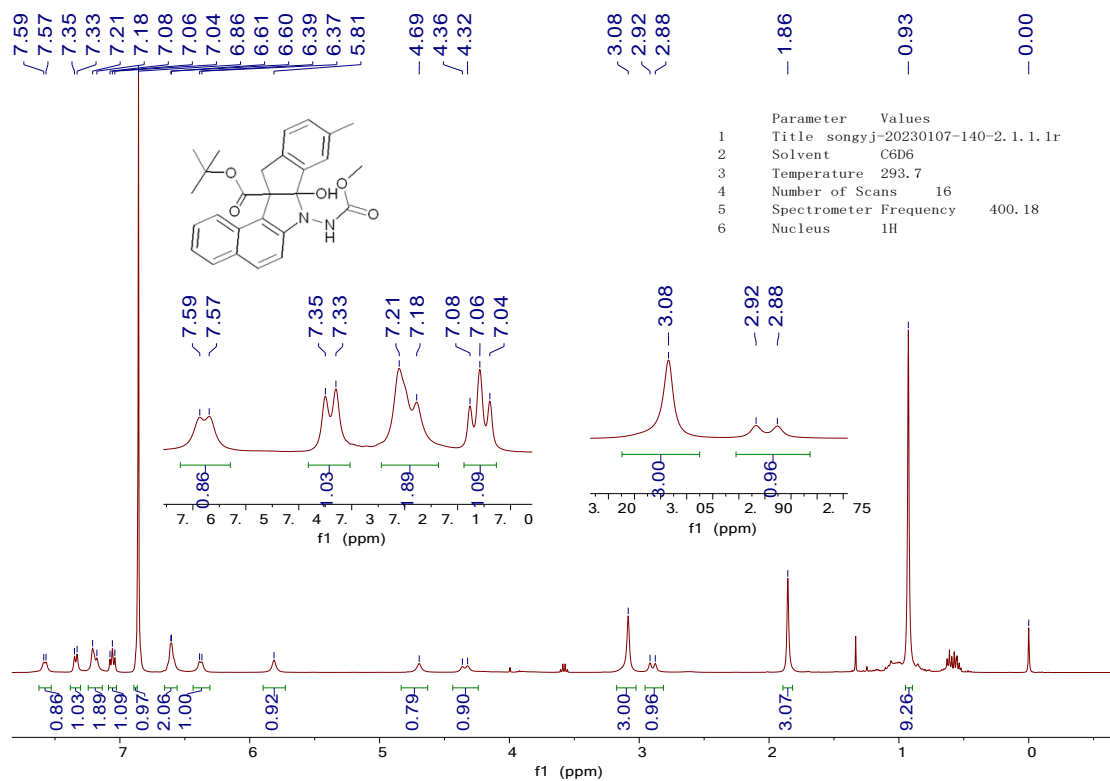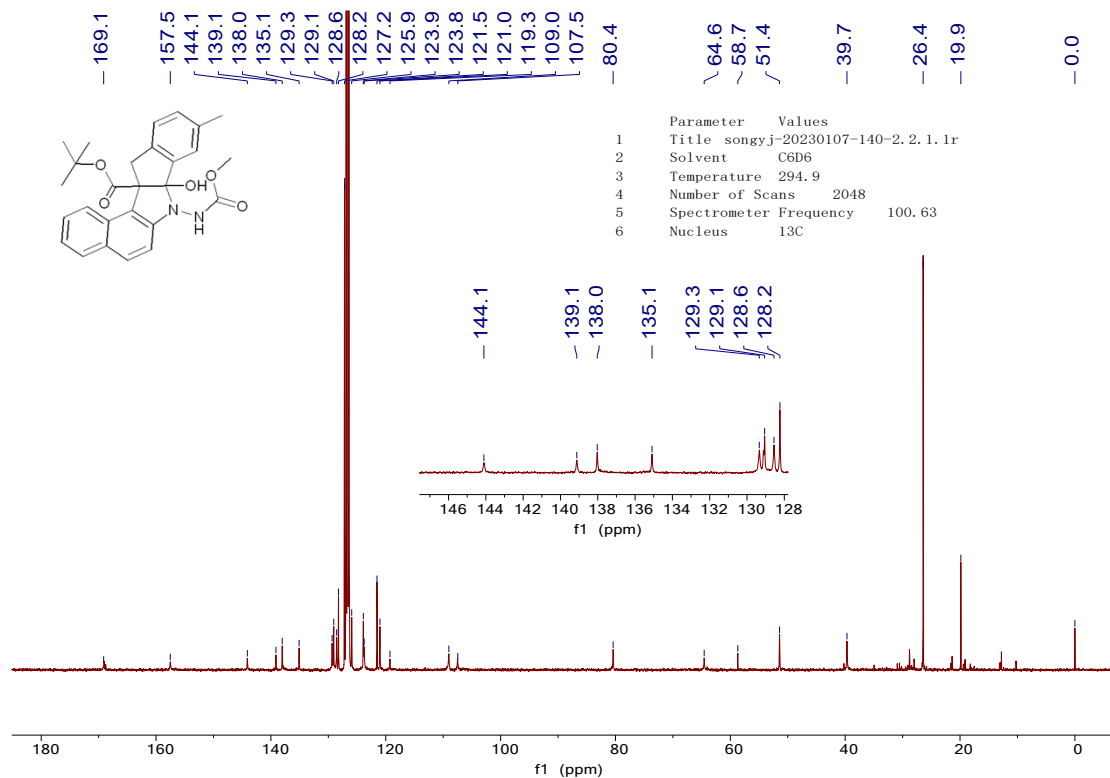

**C12:**

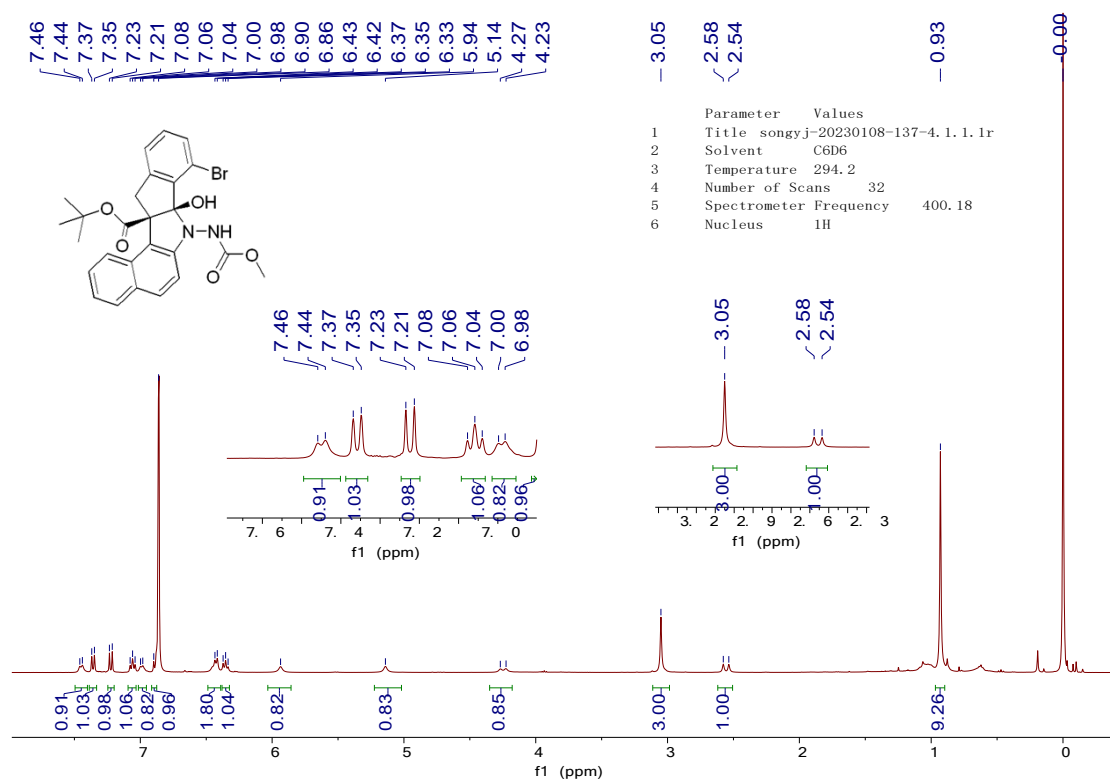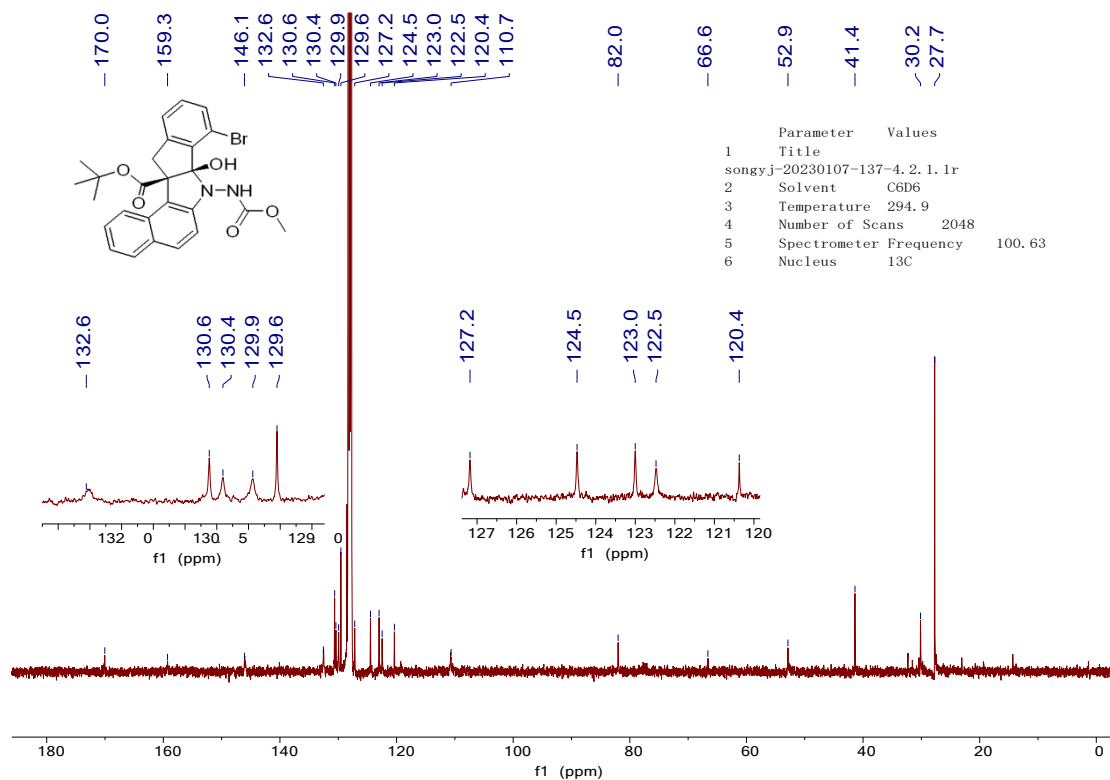

**C13:**

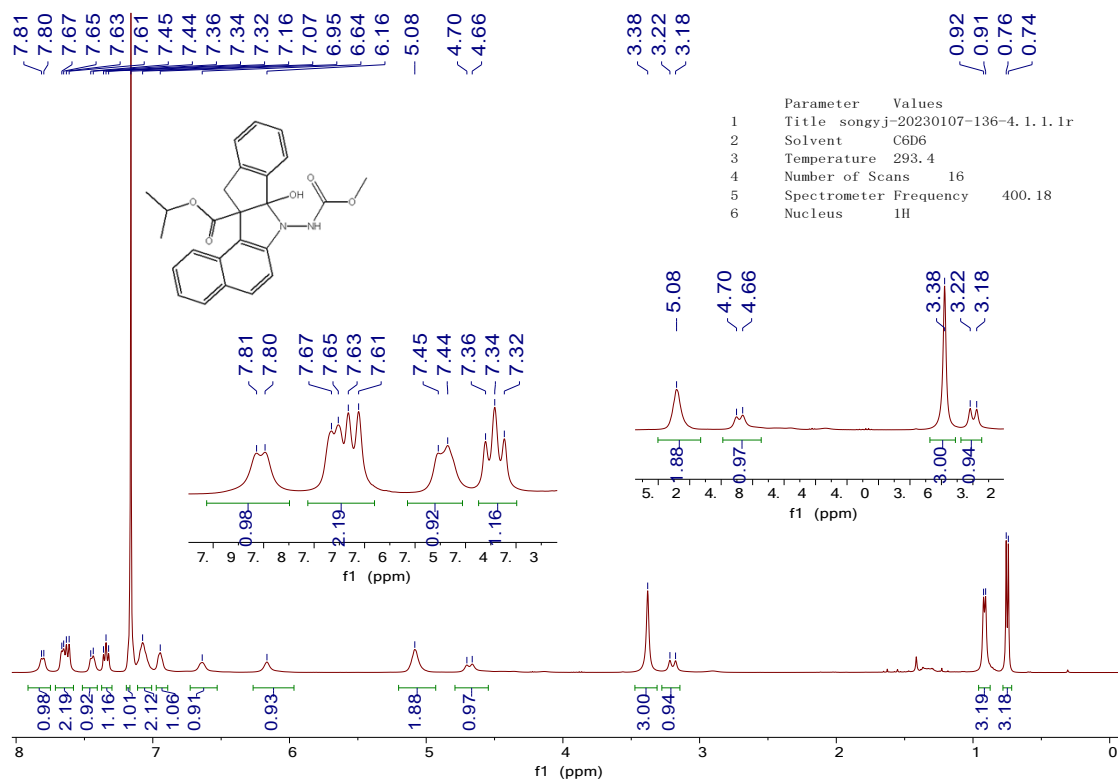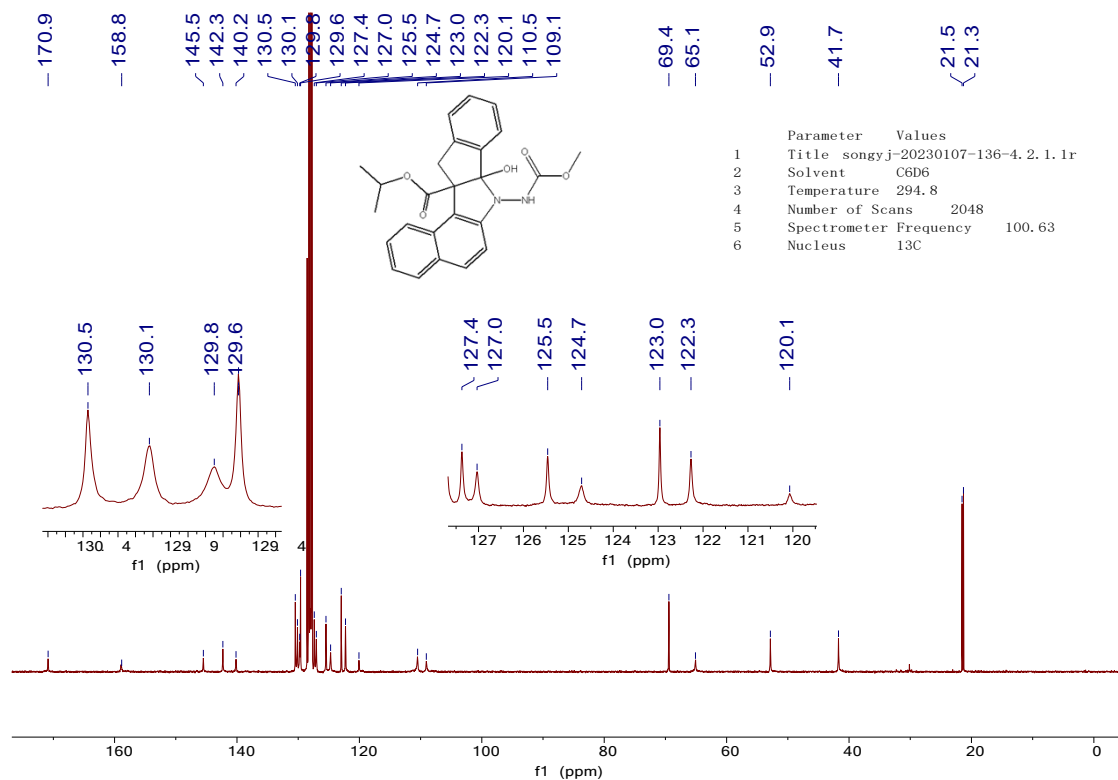

**C14:**

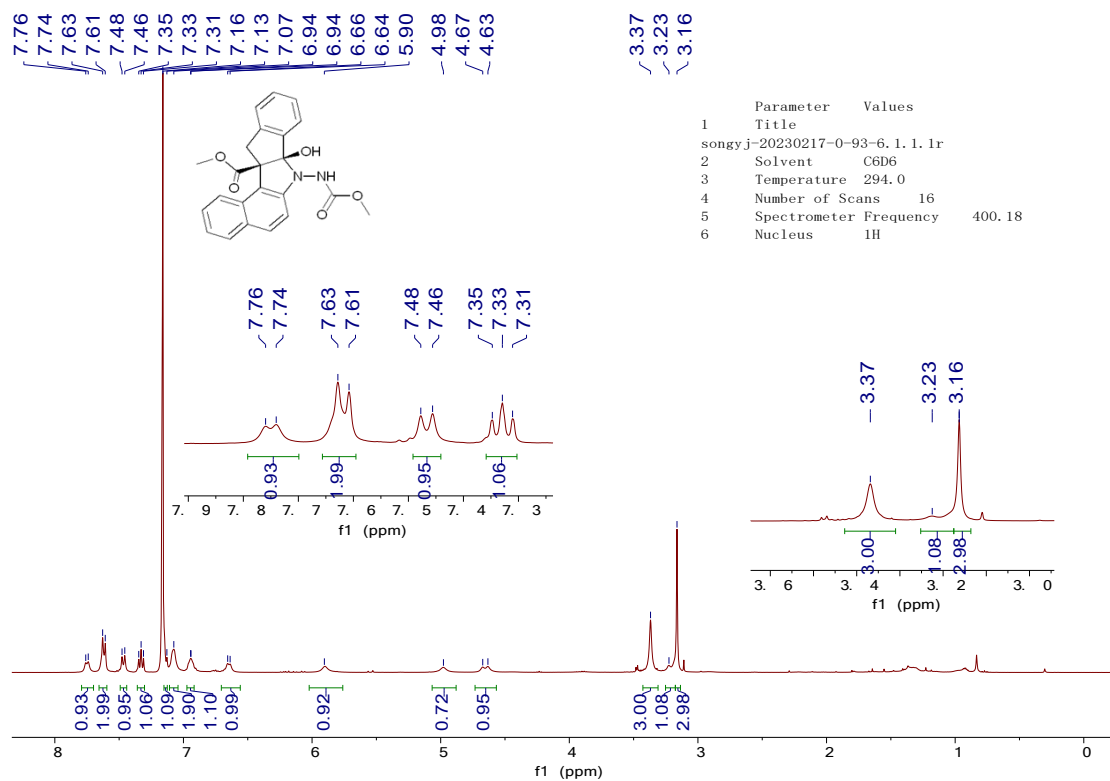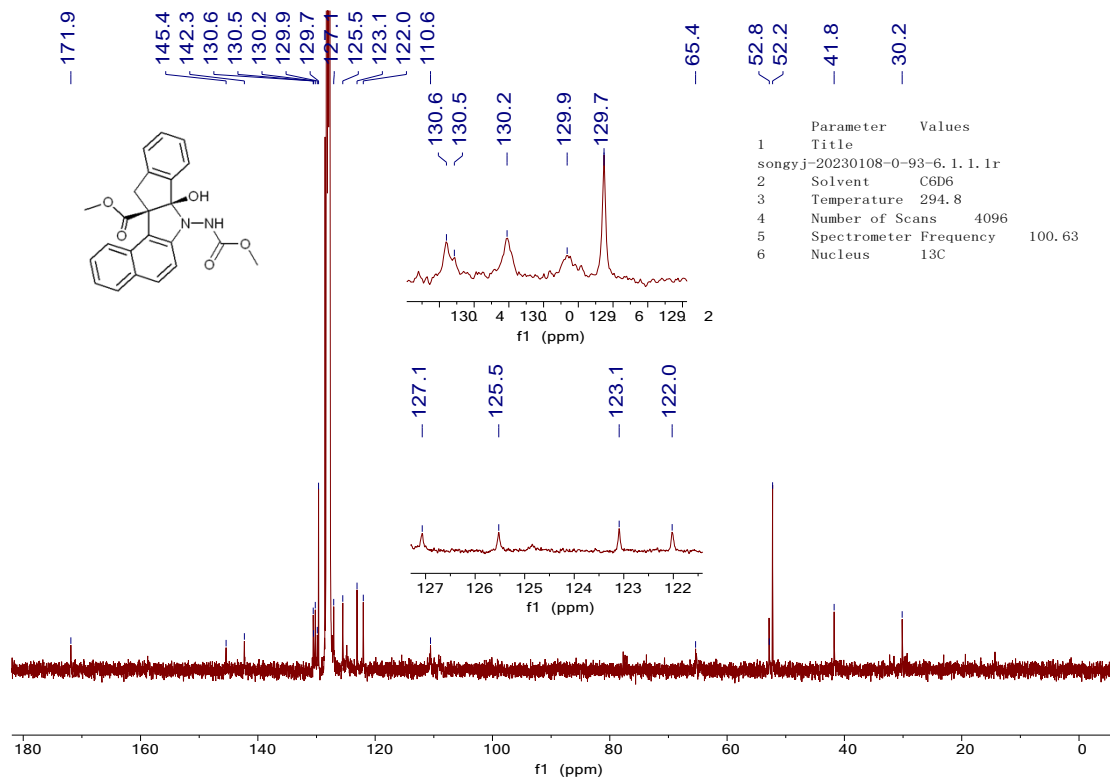

**C15:**

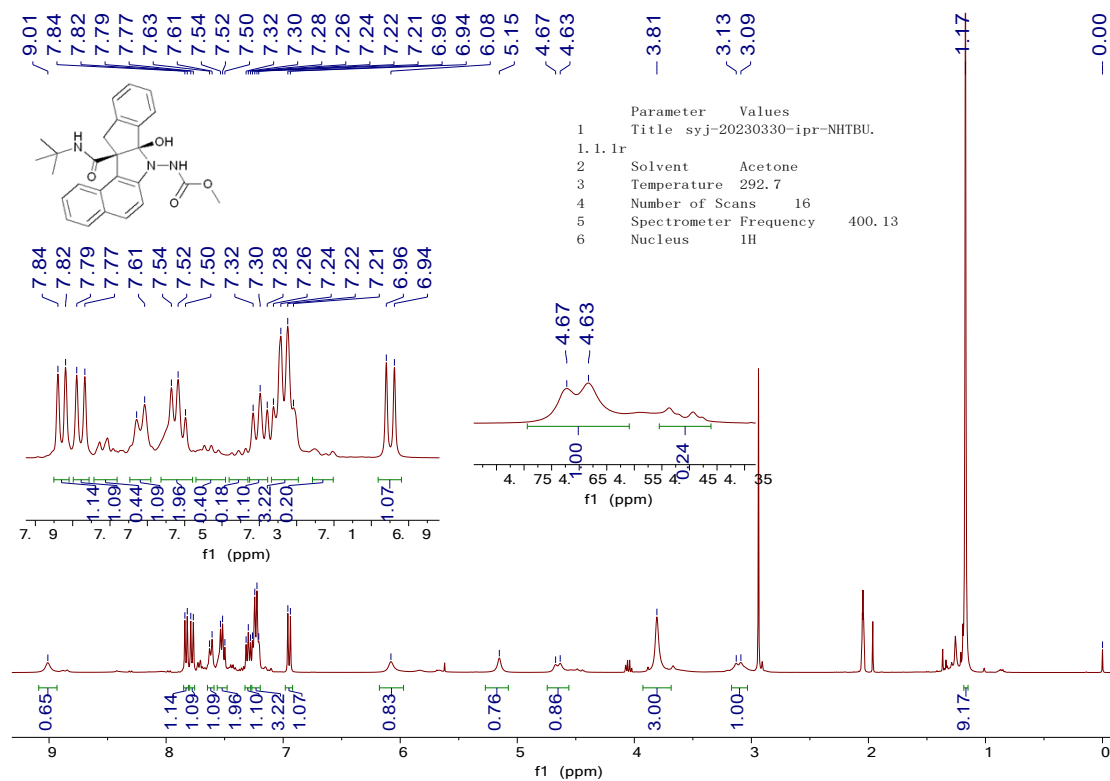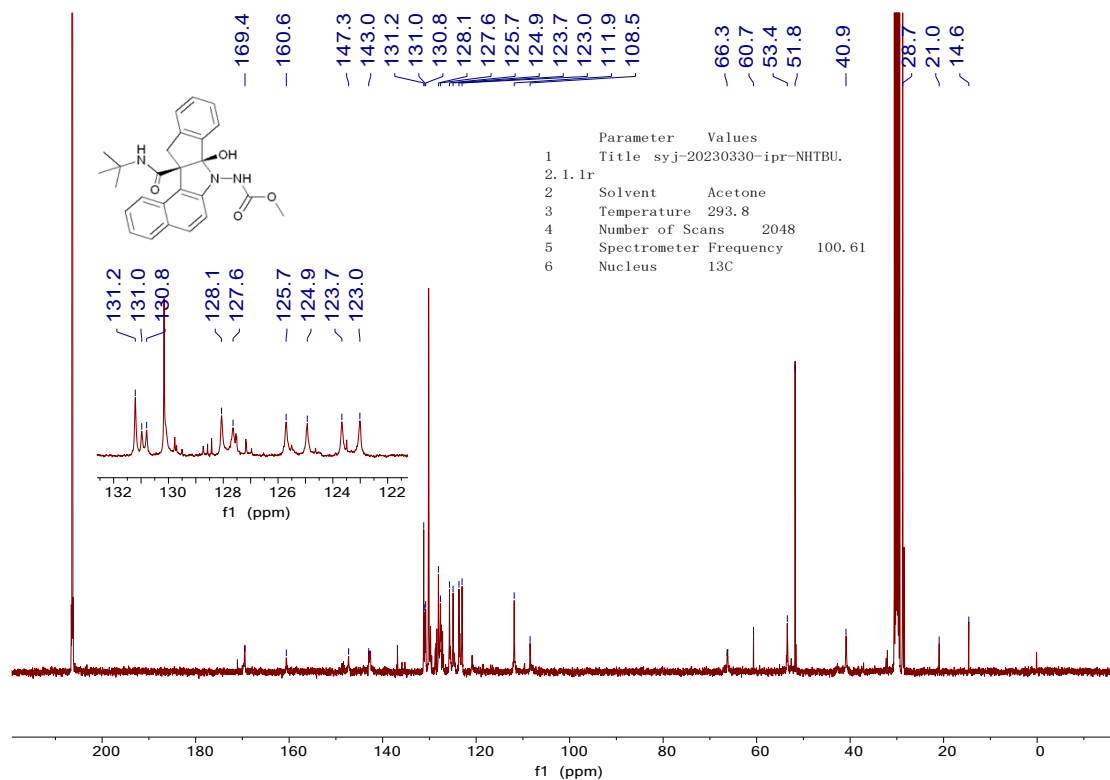

**C16:**

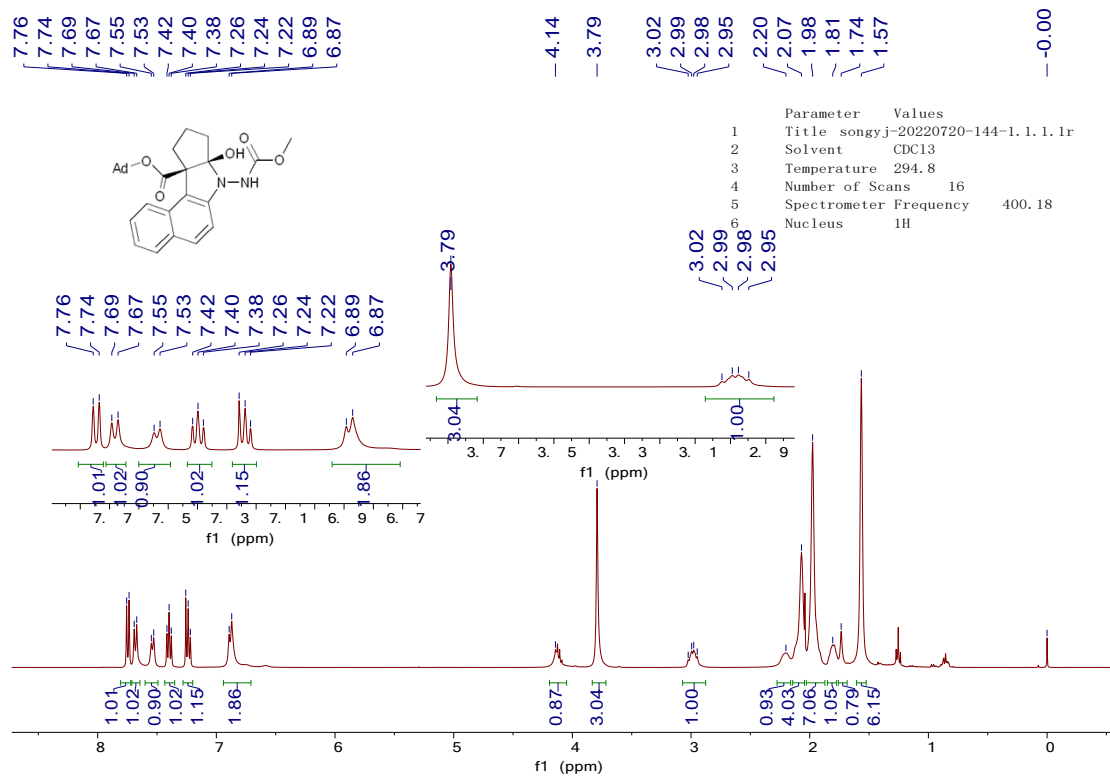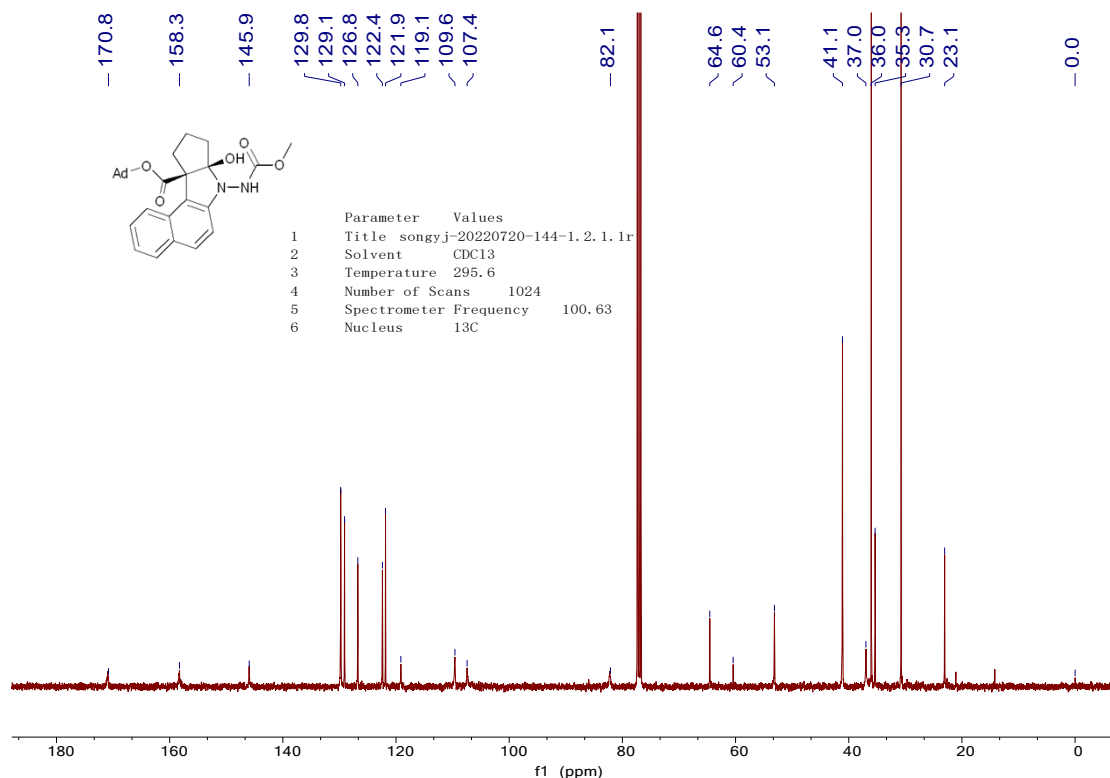

**C17:**

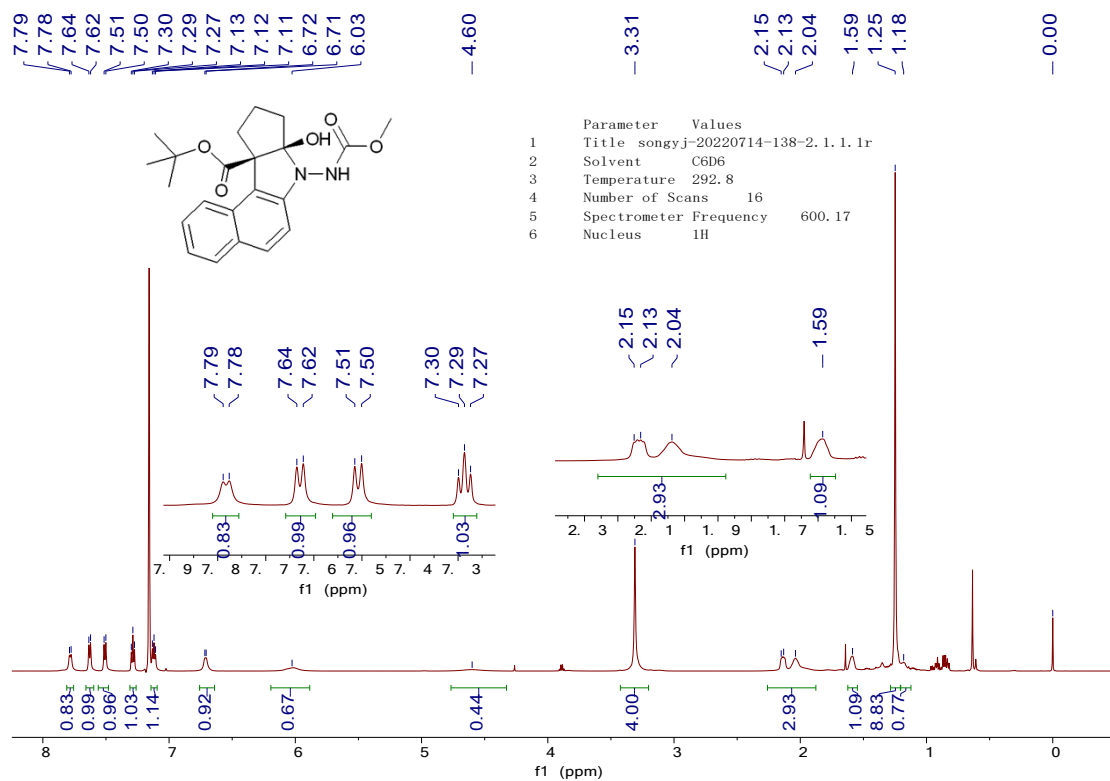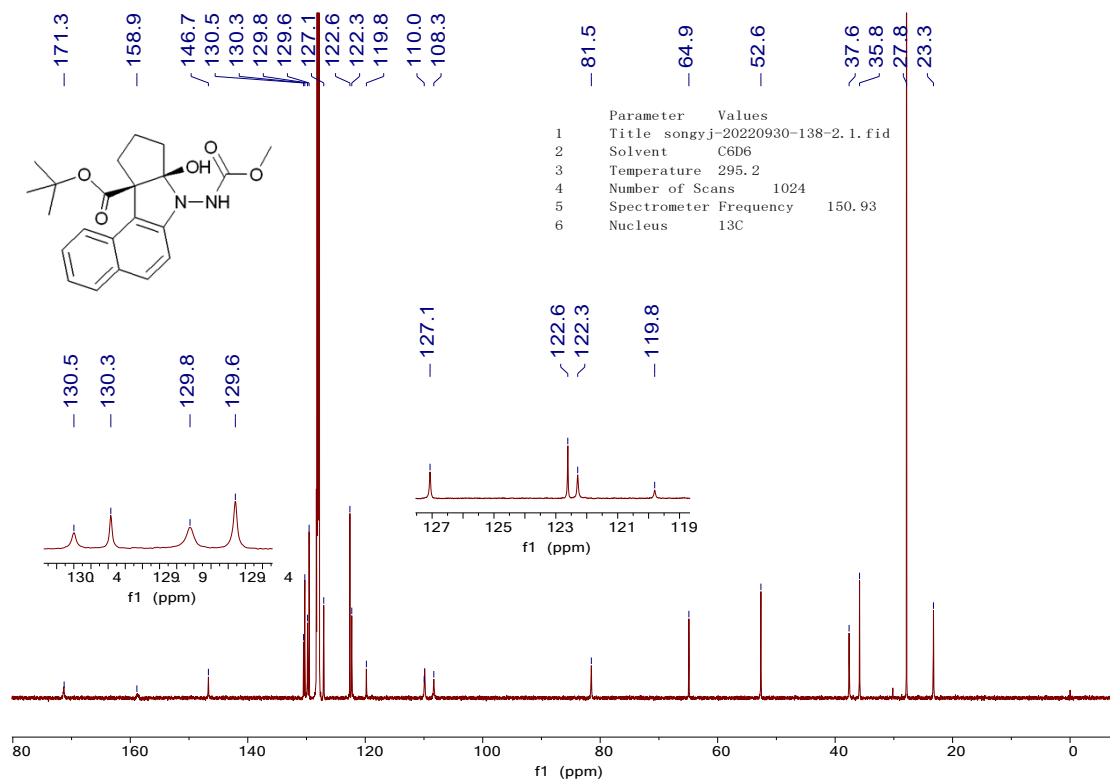



**C18:**

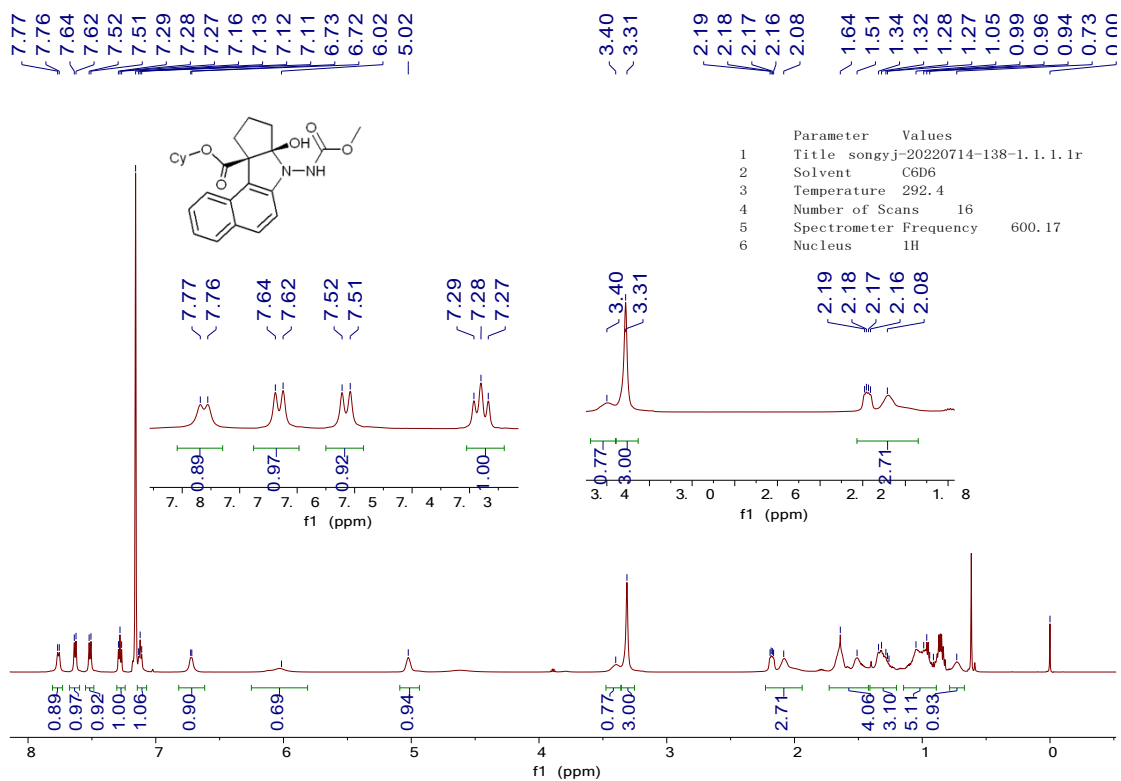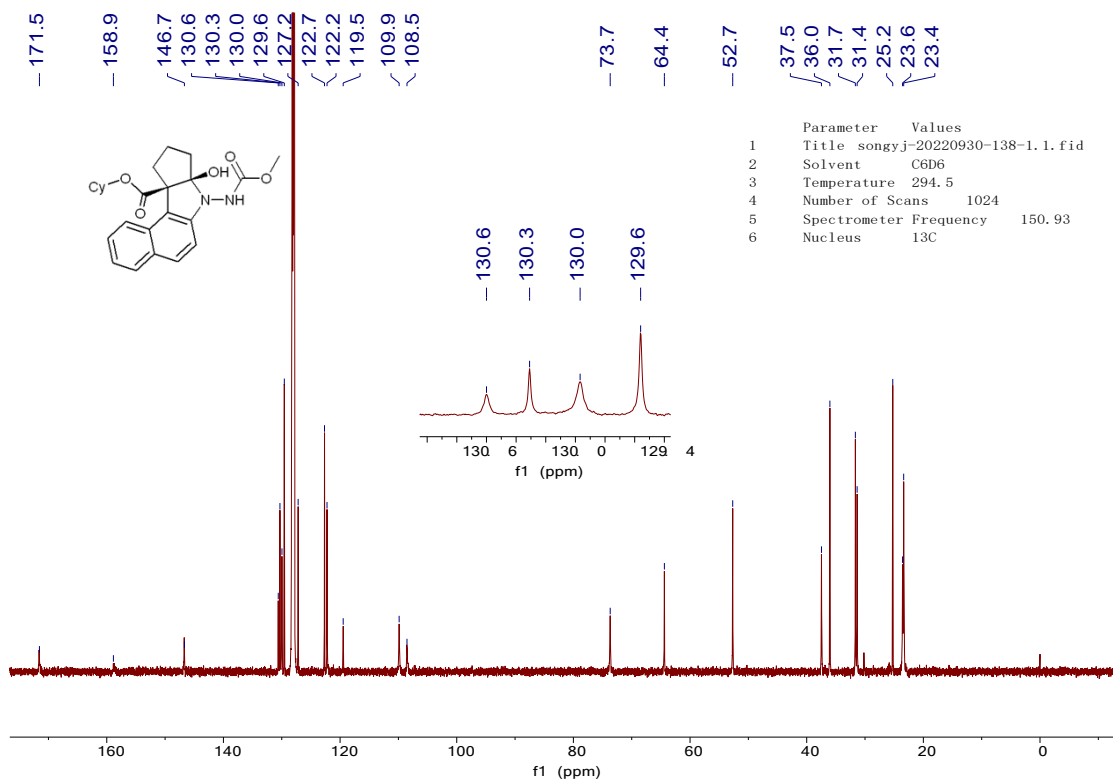

**C19:**

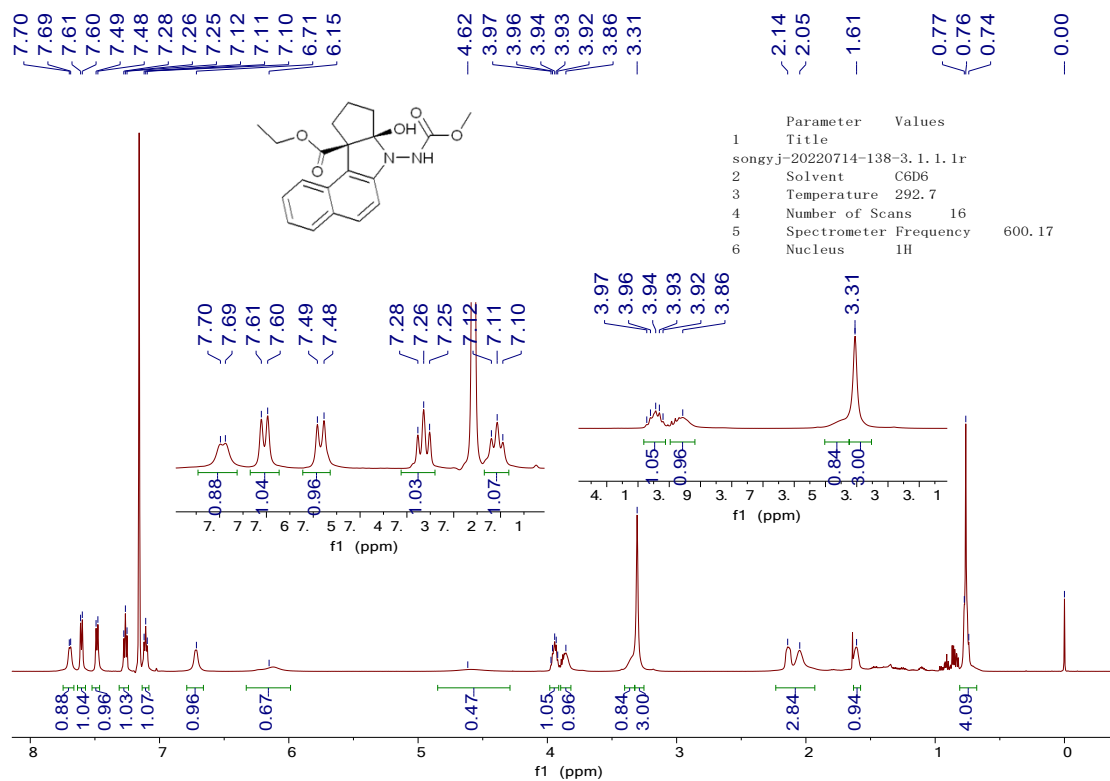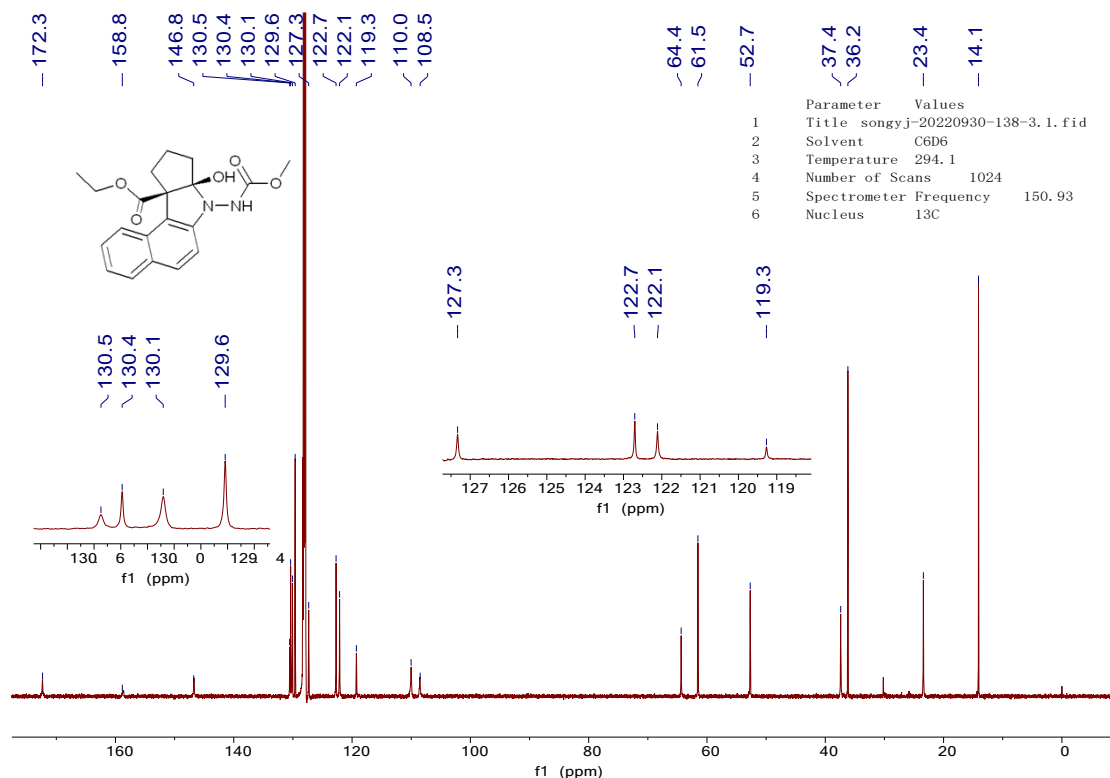

**C20:**

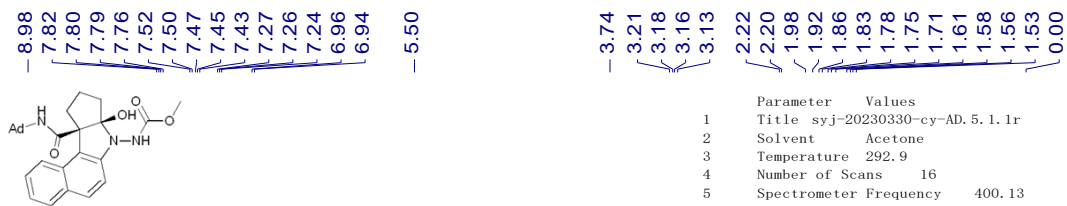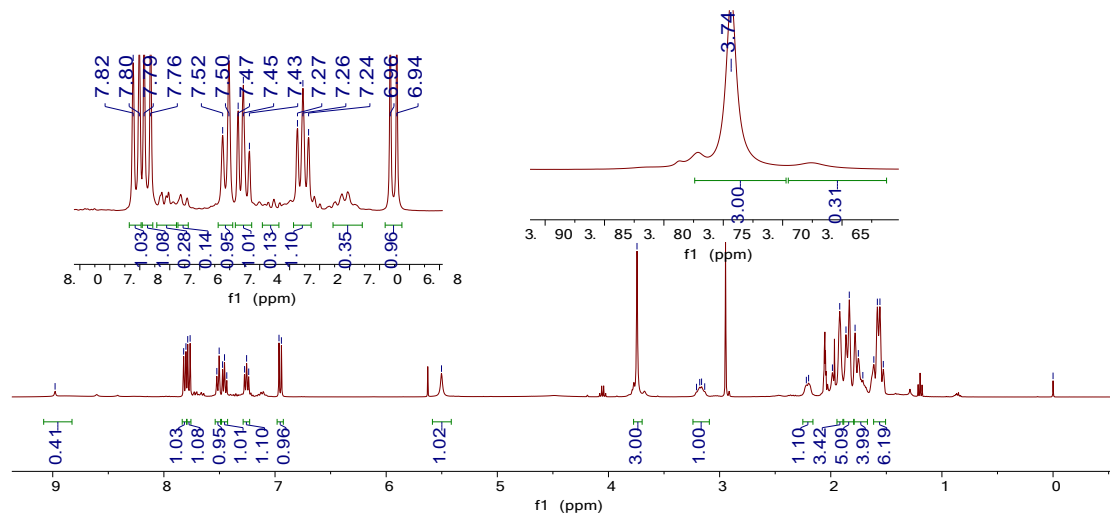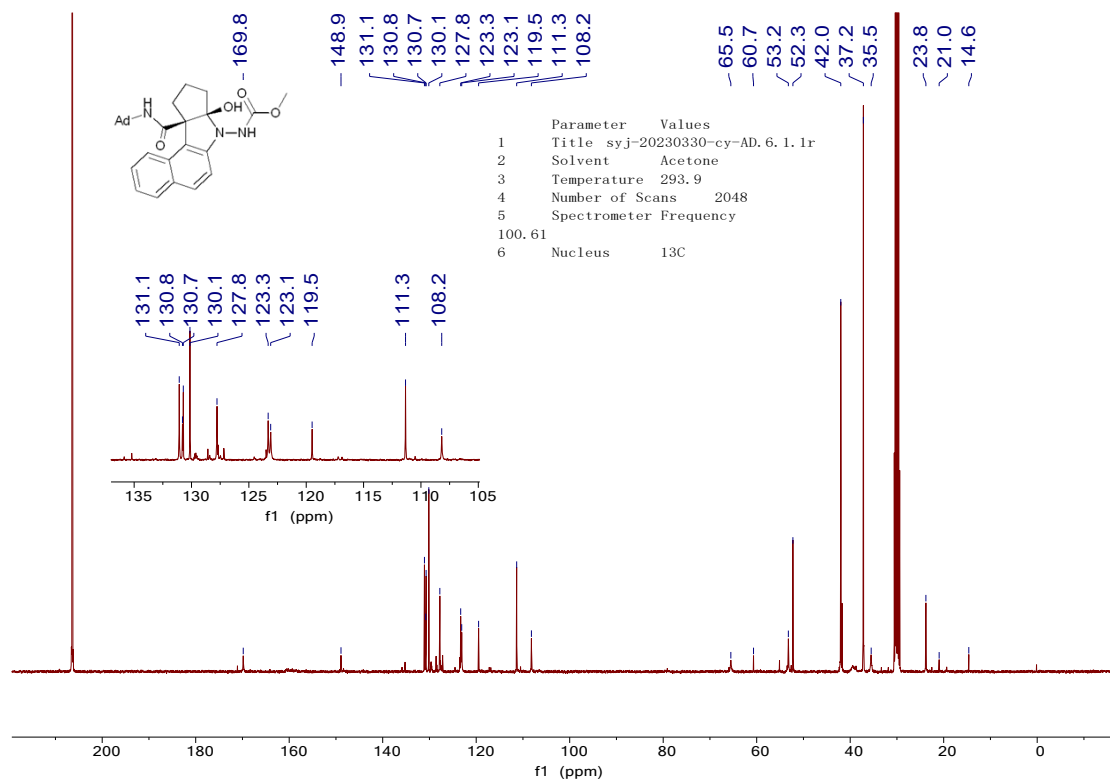

**C21:**

7.76 7.74 7.70 7.67 7.55 7.53 7.42 7.40 7.38 7.26 7.26 7.23 7.22 6.90 6.88 6.79 4.27 4.25 4.23 4.21 4.15 3.02 2.99 2.98 2.95 2.22 2.12 2.07 1.98 1.82 1.80 1.79 1.71 1.70 1.57 1.32 - 0.00

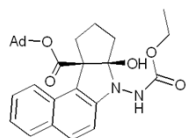

| Parameter | Values                             |
|-----------|------------------------------------|
| 1         | Title songyj-20220718-121-1.1.1.1r |
| 2         | Solvent CDC13                      |
| 3         | Temperature 294.8                  |
| 4         | Number of Scans 16                 |
| 5         | Spectrometer Frequency 400.18      |
| 6         | Nucleus 1H                         |

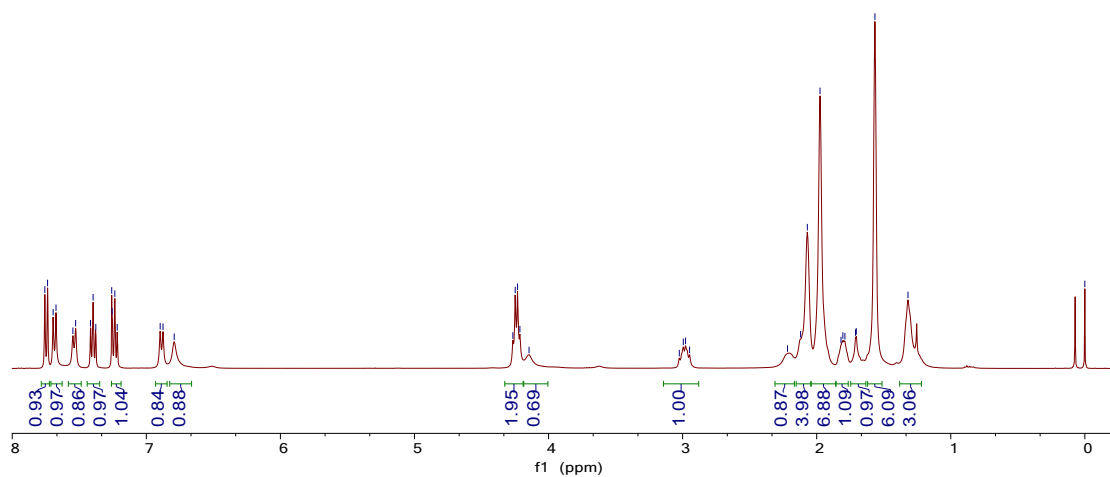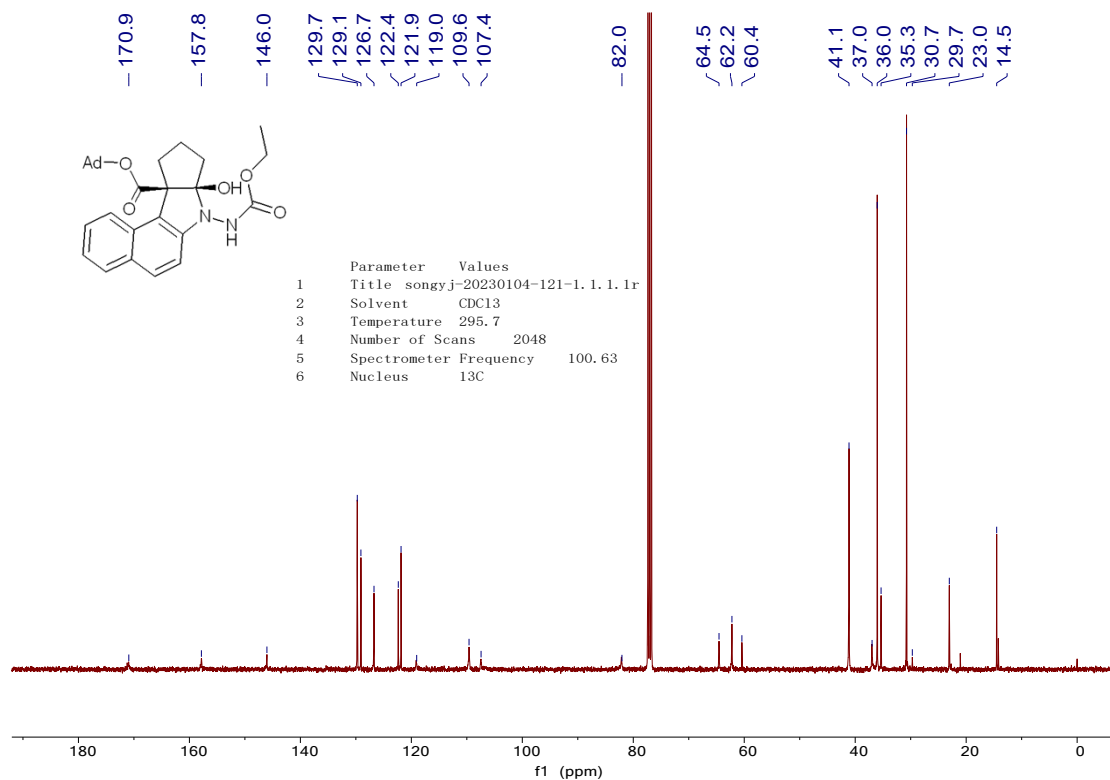

| Parameter | Values                             |
|-----------|------------------------------------|
| 1         | Title songyj-20230104-121-1.1.1.1r |
| 2         | Solvent CDC13                      |
| 3         | Temperature 295.7                  |
| 4         | Number of Scans 2048               |
| 5         | Spectrometer Frequency 100.63      |
| 6         | Nucleus 13C                        |

C22:

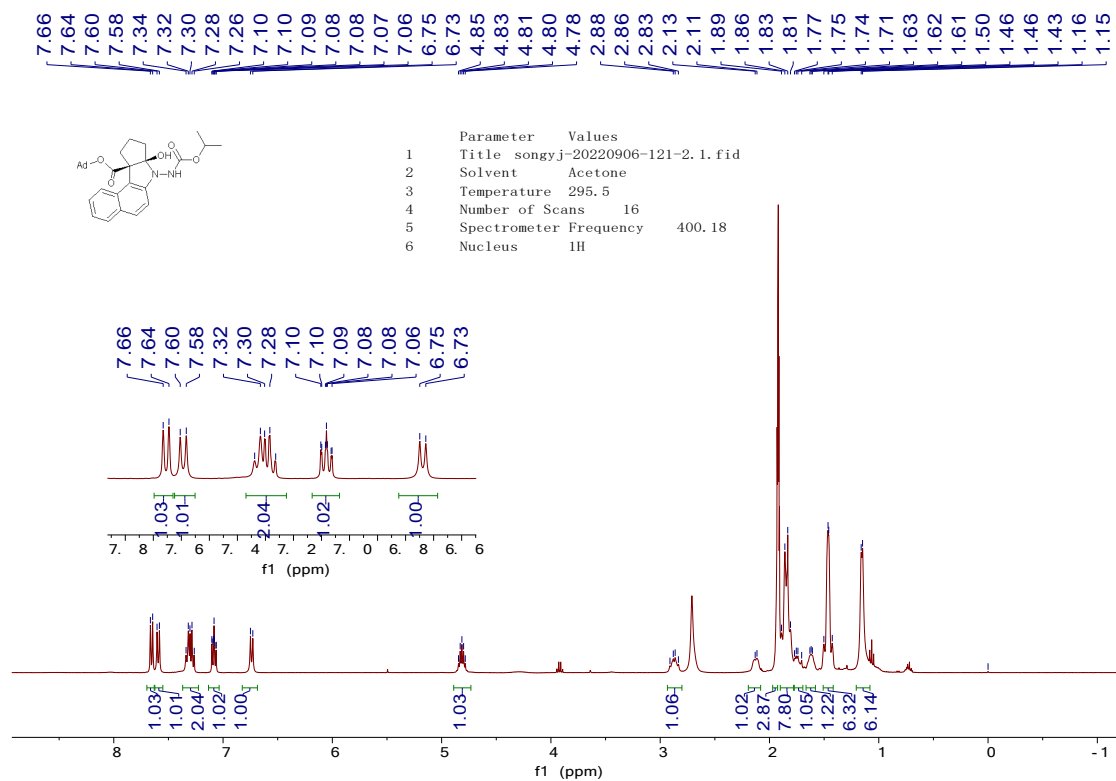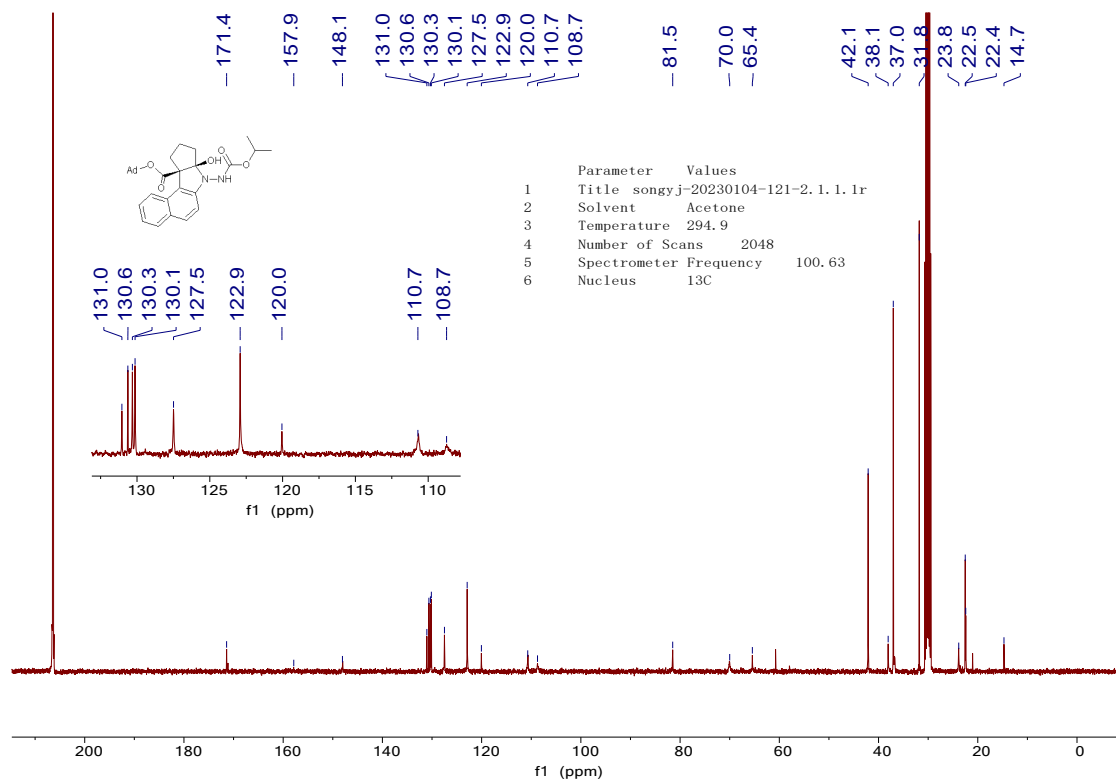

**C23:**

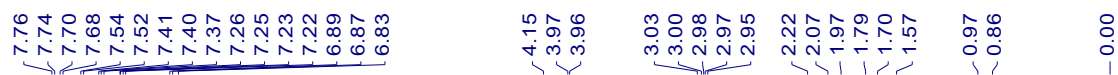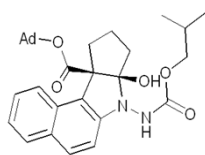

| Parameter | Values                             |
|-----------|------------------------------------|
| 1         | Title songyj-20220719-121-3.1.1.1r |
| 2         | Solvent CDCl3                      |
| 3         | Temperature 294.7                  |
| 4         | Number of Scans 16                 |
| 5         | Spectrometer Frequency 400.18      |
| 6         | Nucleus 1H                         |

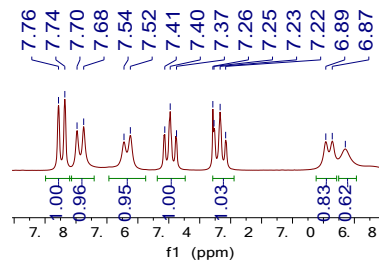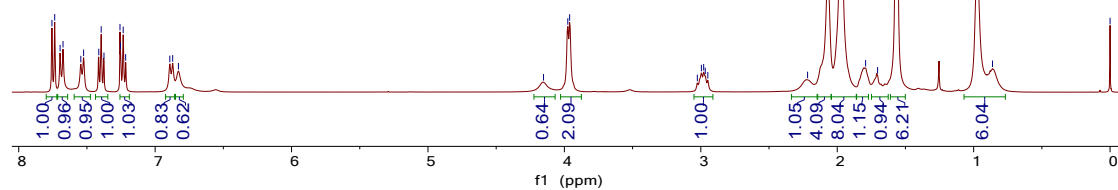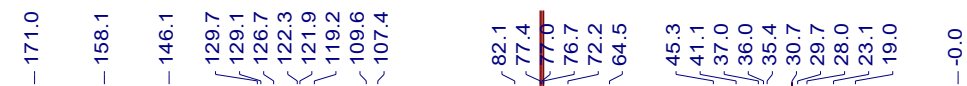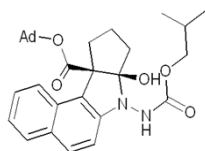

| Parameter | Values                             |
|-----------|------------------------------------|
| 1         | Title songyj-20220719-121-3.2.1.1r |
| 2         | Solvent CDCl3                      |
| 3         | Temperature 295.2                  |
| 4         | Number of Scans 1024               |
| 5         | Spectrometer Frequency 100.63      |
| 6         | Nucleus 13C                        |

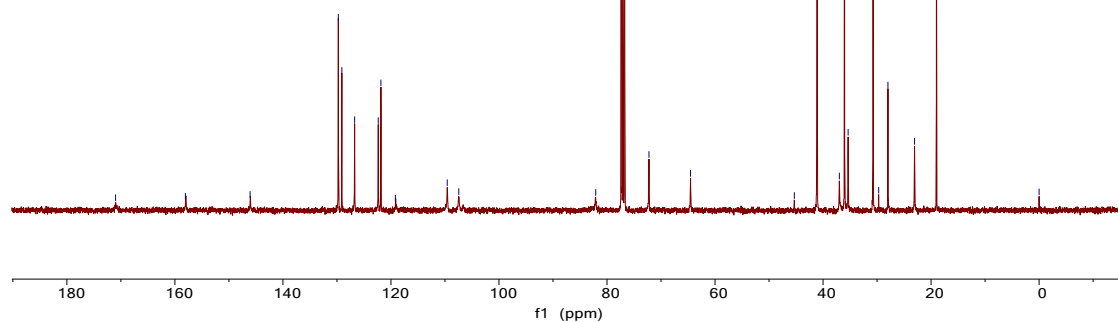

C24:

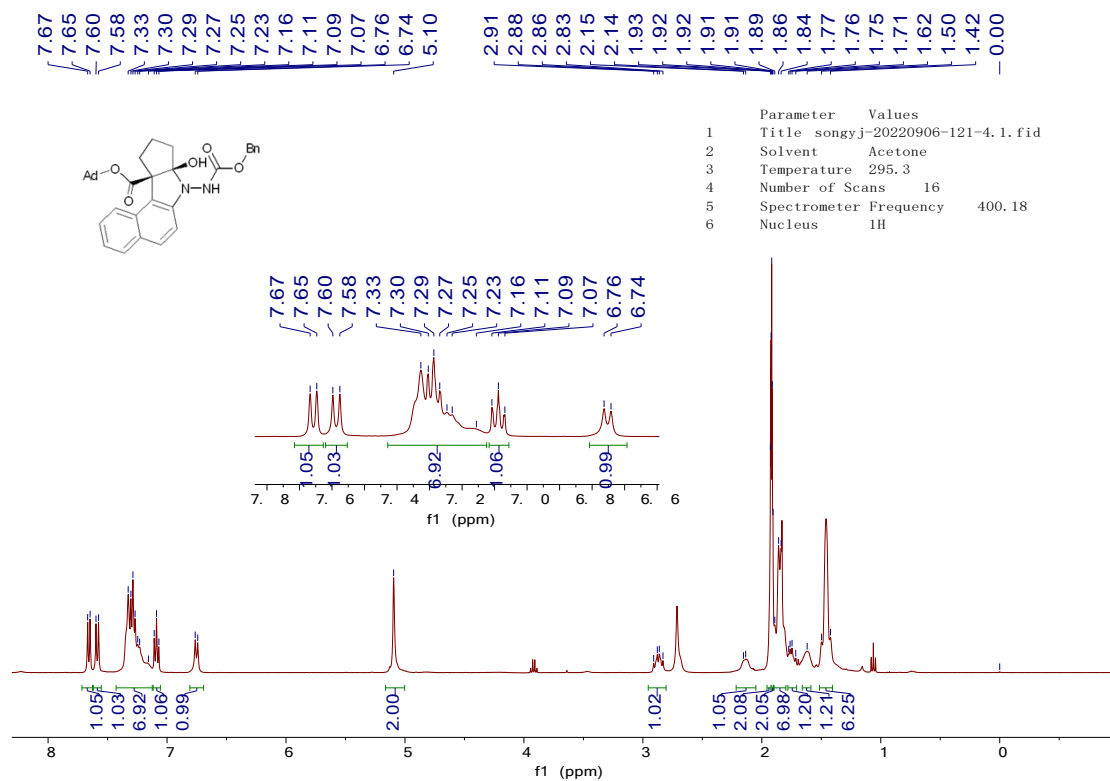

| Parameter | Values                            |
|-----------|-----------------------------------|
| 1         | Title songyj-20220906-121-4.1.fid |
| 2         | Solvent Acetone                   |
| 3         | Temperature 295.3                 |
| 4         | Number of Scans 16                |
| 5         | Spectrometer Frequency 400.18     |
| 6         | Nucleus 1H                        |

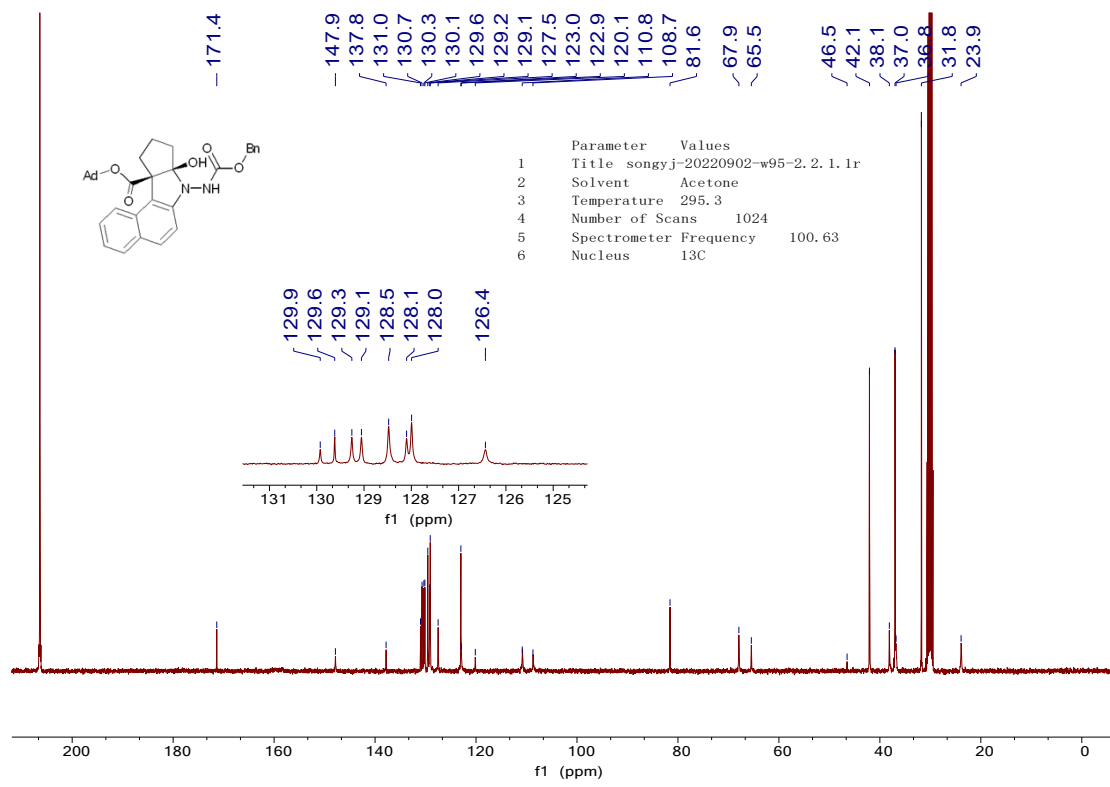

| Parameter | Values                             |
|-----------|------------------------------------|
| 1         | Title songyj-20220902-w95-2.2.1.1r |
| 2         | Solvent Acetone                    |
| 3         | Temperature 295.3                  |
| 4         | Number of Scans 1024               |
| 5         | Spectrometer Frequency 100.63      |
| 6         | Nucleus 13C                        |

C25:

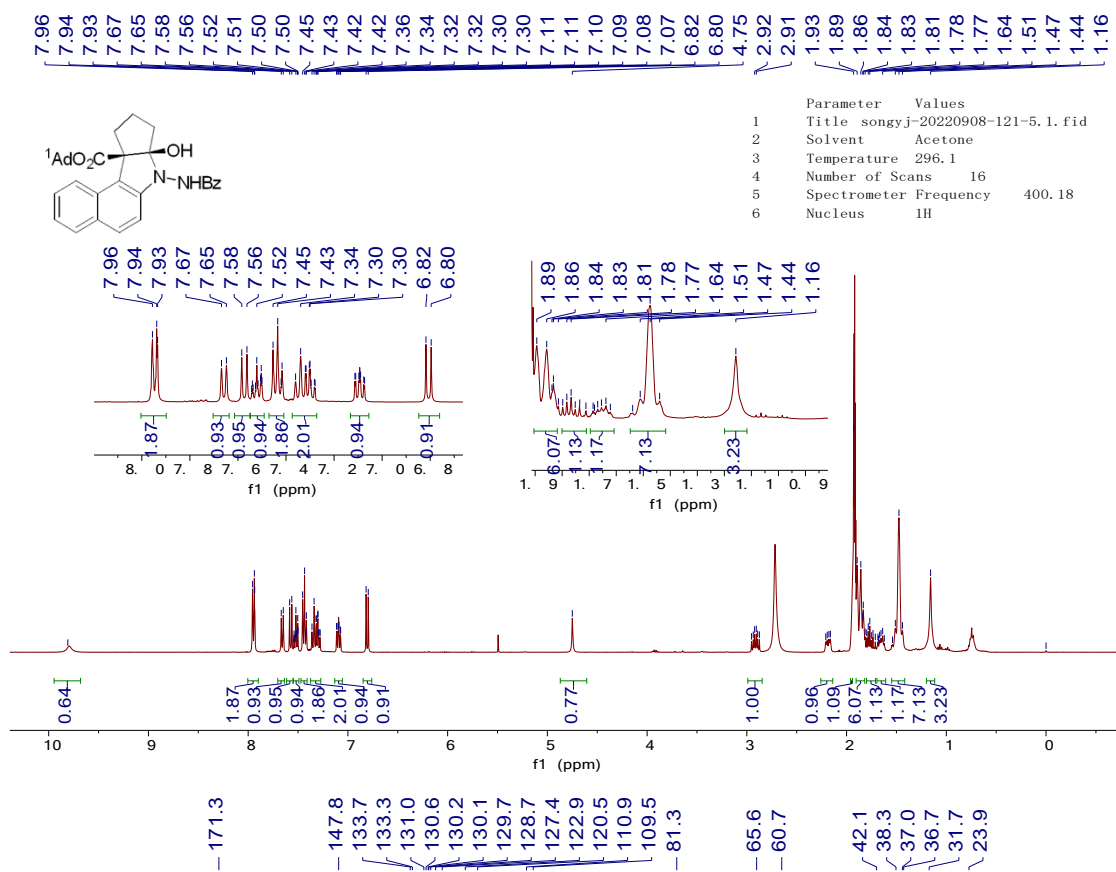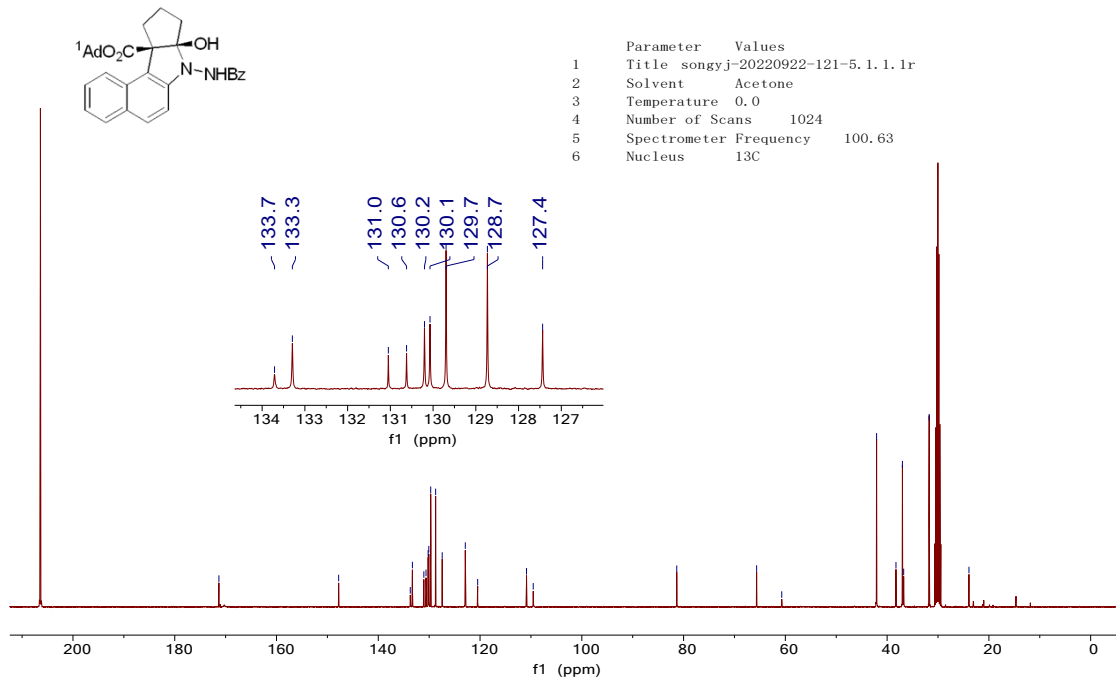



**C26:**

7.91 7.89 7.86 7.68 7.66 7.57 7.55 7.54 7.51 7.40 7.38 7.36 7.18 6.82 6.80 6.77 -5.18 3.44 3.41 3.39 3.36 2.30 2.28 2.24 2.21 2.19 2.16 2.13 2.11 1.97 1.79 1.69 1.67 1.33 1.30 1.27 1.24

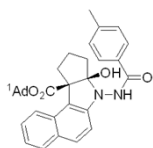

| Parameter | Values                             |
|-----------|------------------------------------|
| 1         | Title songyj-20230201-191-3.1.1.1r |
| 2         | Solvent C6D6                       |
| 3         | Temperature 294.2                  |
| 4         | Number of Scans 16                 |
| 5         | Spectrometer Frequency 400.18      |
| 6         | Nucleus 1H                         |

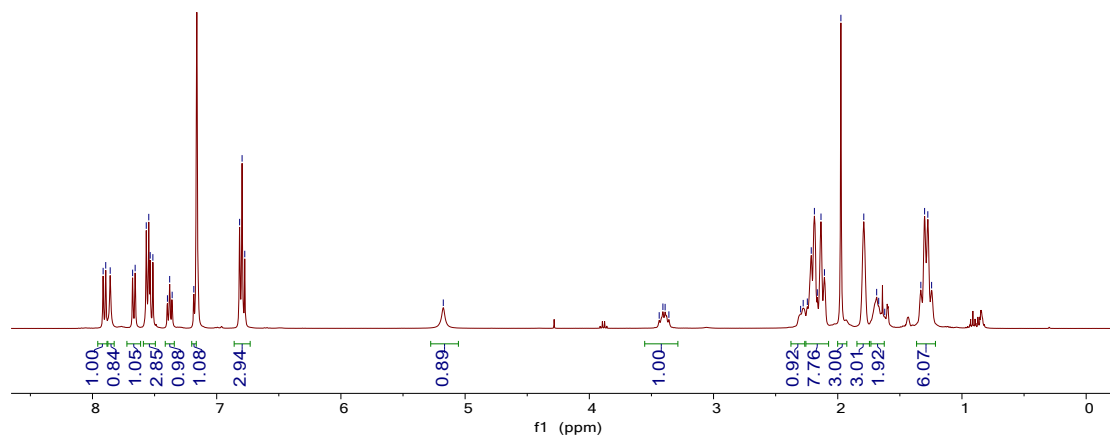

171.1 169.3 147.0 142.7 130.7 130.3 129.8 129.7 129.6 129.4 127.0 122.5 122.5 120.3 110.2 109.0 -81.6 -65.3 45.6 41.4 38.1 36.1 35.9 31.0 23.4 21.2

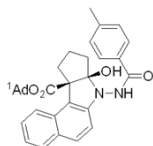

| Parameter | Values                             |
|-----------|------------------------------------|
| 1         | Title songyj-20230206-191-3.1.1.1r |
| 2         | Solvent C6D6                       |
| 3         | Temperature 294.7                  |
| 4         | Number of Scans 2048               |
| 5         | Spectrometer Frequency 100.63      |
| 6         | Nucleus 13C                        |

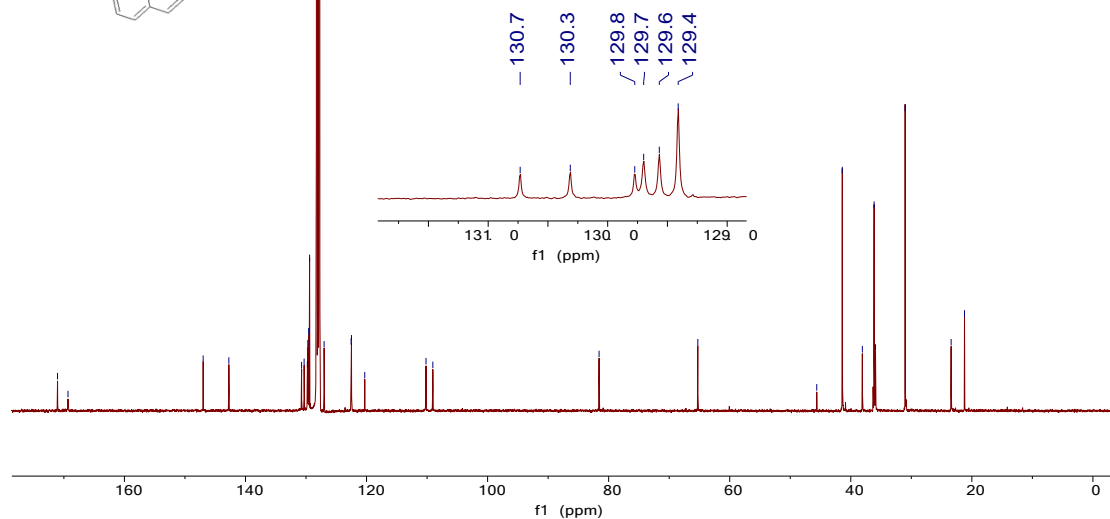

C27:

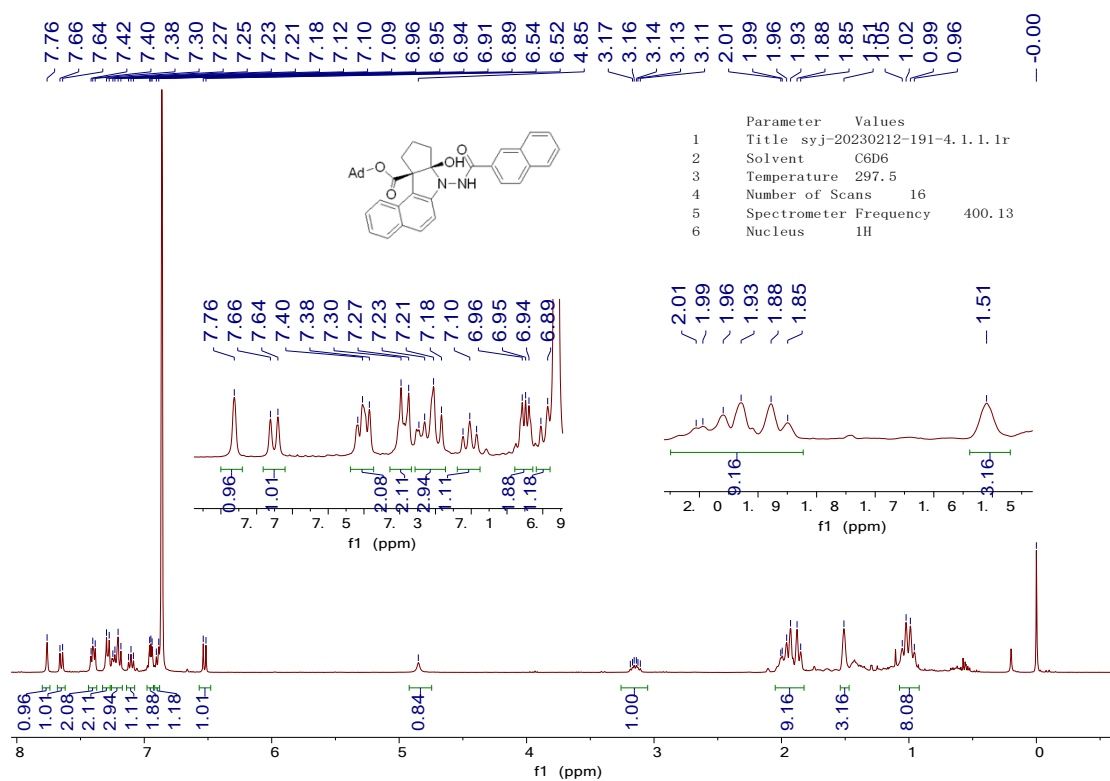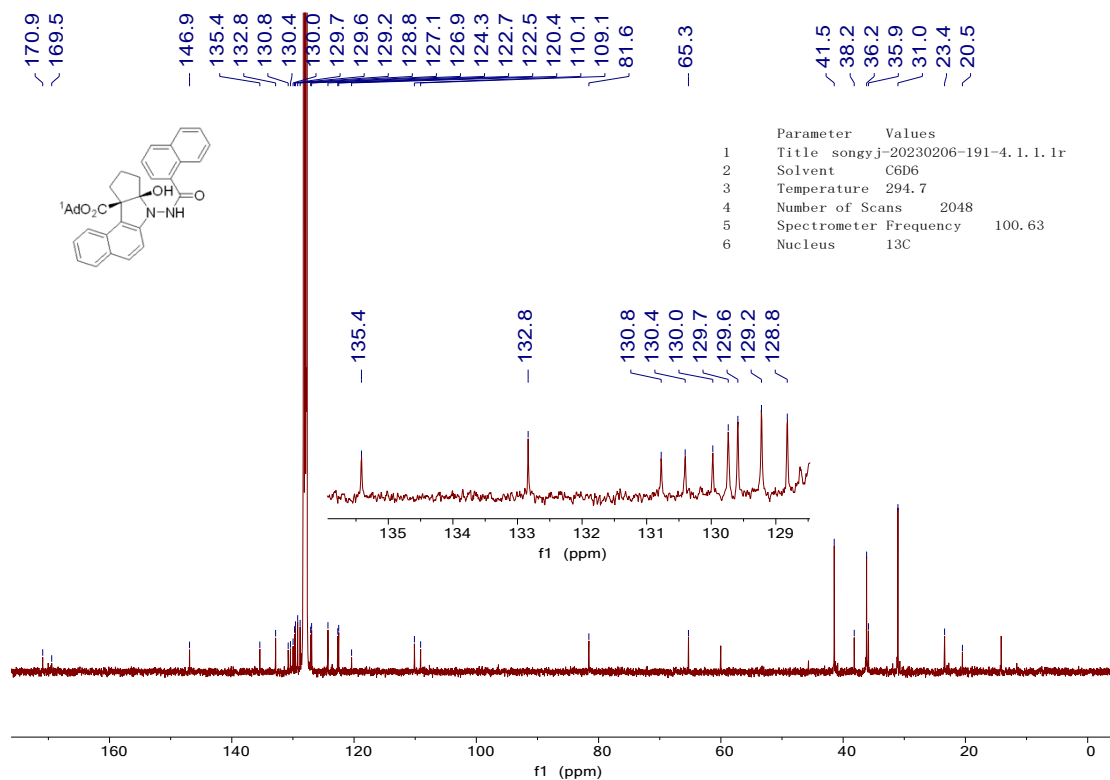

C28:

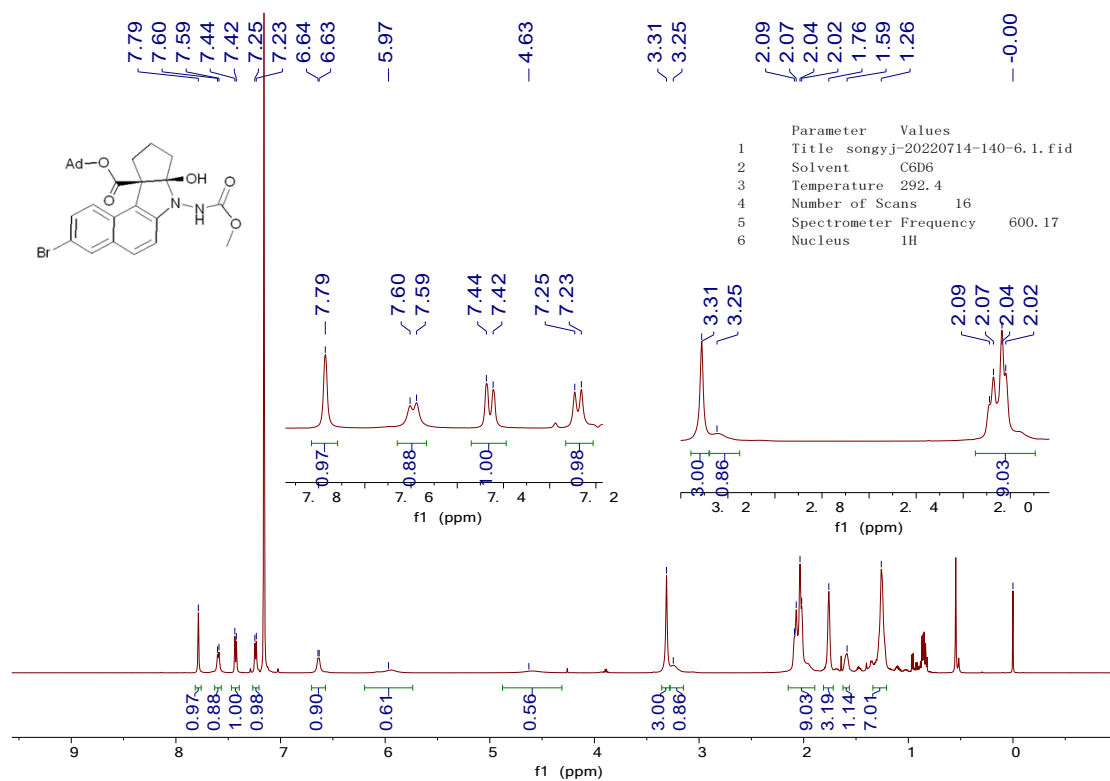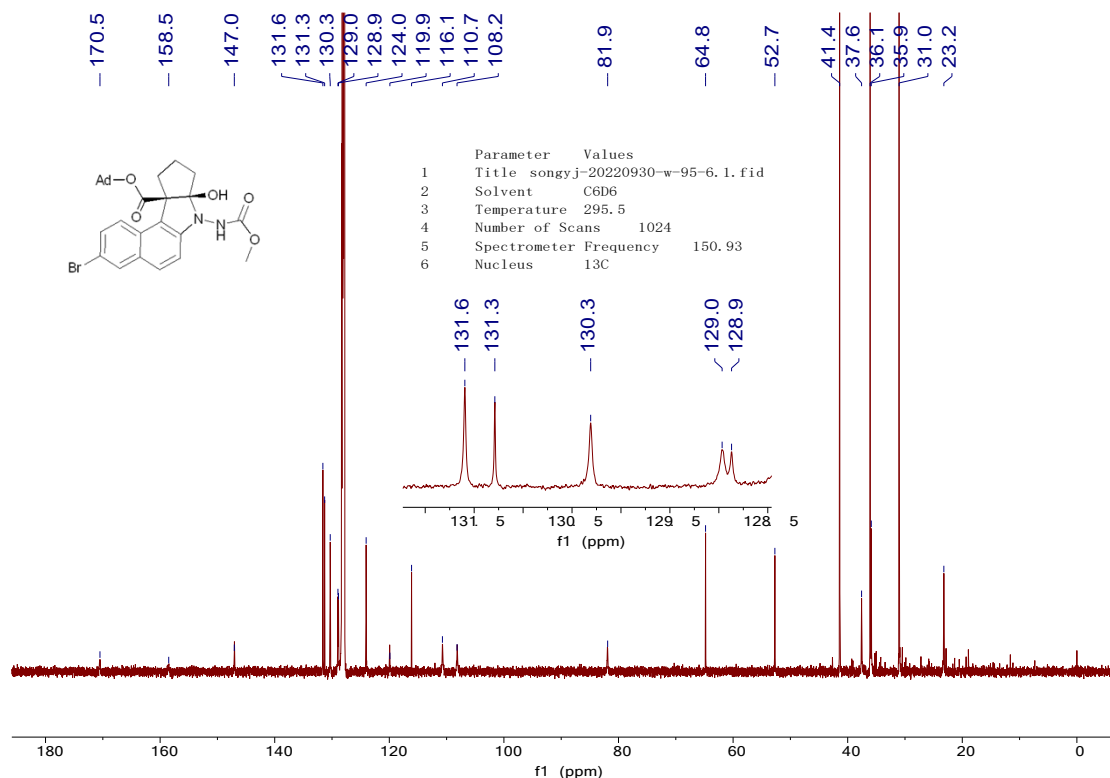

**C29:**

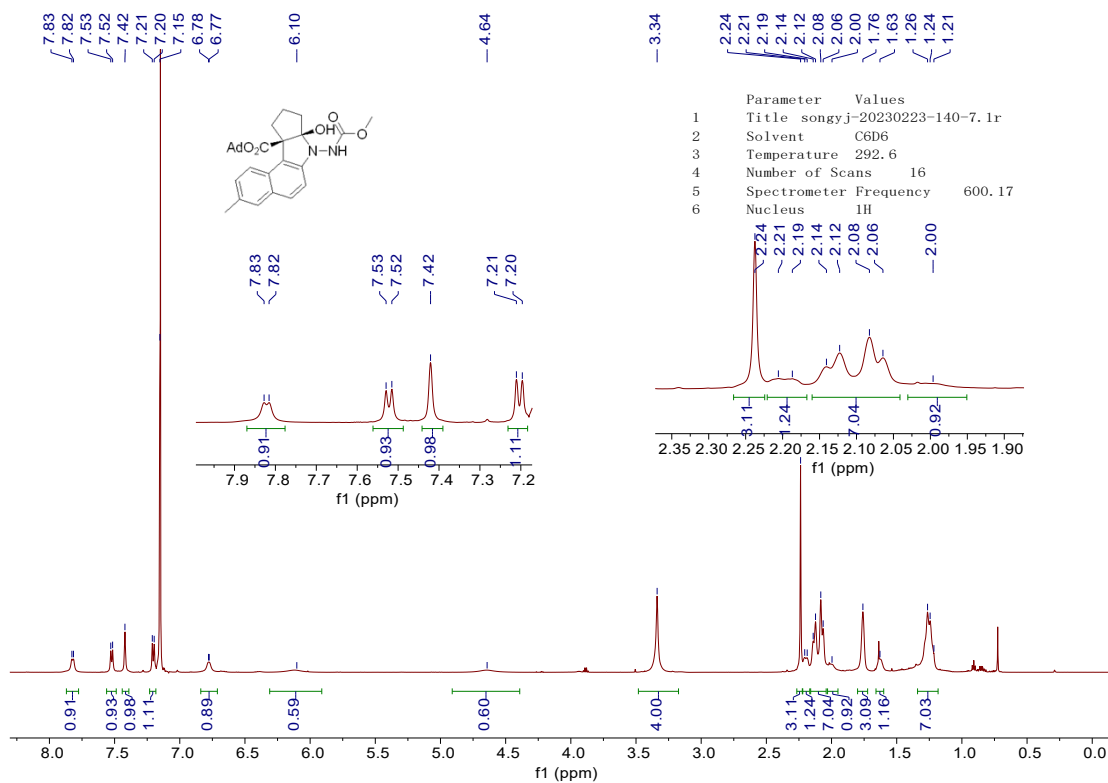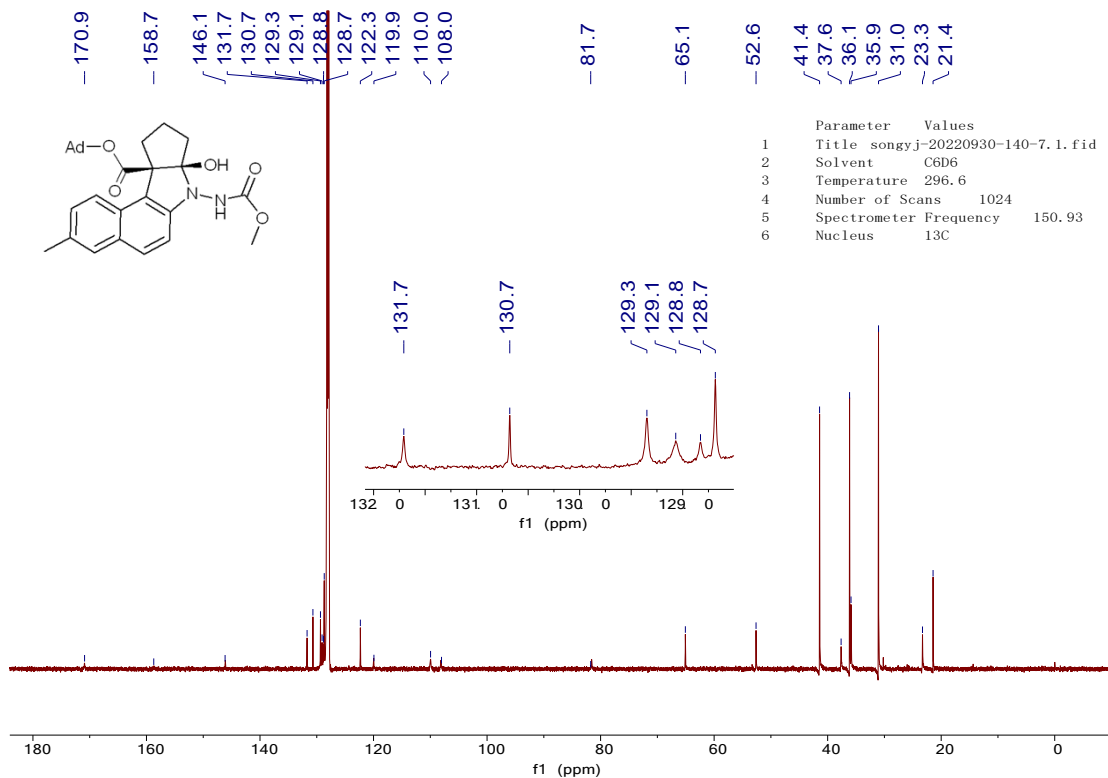

**C30:**

7.76  
7.74  
7.64  
7.61  
7.59  
7.42  
7.42  
7.40  
7.40  
7.39  
7.37  
7.35  
7.27  
7.25  
7.23  
6.78  
6.76

- 3.62  
2.93  
2.90  
2.88  
2.85  
2.73  
1.95  
1.93  
1.92  
1.88  
1.86  
1.76  
1.73  
1.62  
1.46  
1.43  
1.41  
1.38  
0.00

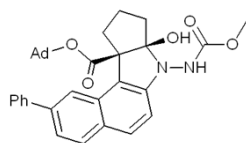

| Parameter | Values                            |
|-----------|-----------------------------------|
| 1         | Title songyj-20220913-140-3.1.fid |
| 2         | Solvent Acetone                   |
| 3         | Temperature 0.0                   |
| 4         | Number of Scans 16                |
| 5         | Spectrometer Frequency 400.18     |
| 6         | Nucleus 1H                        |

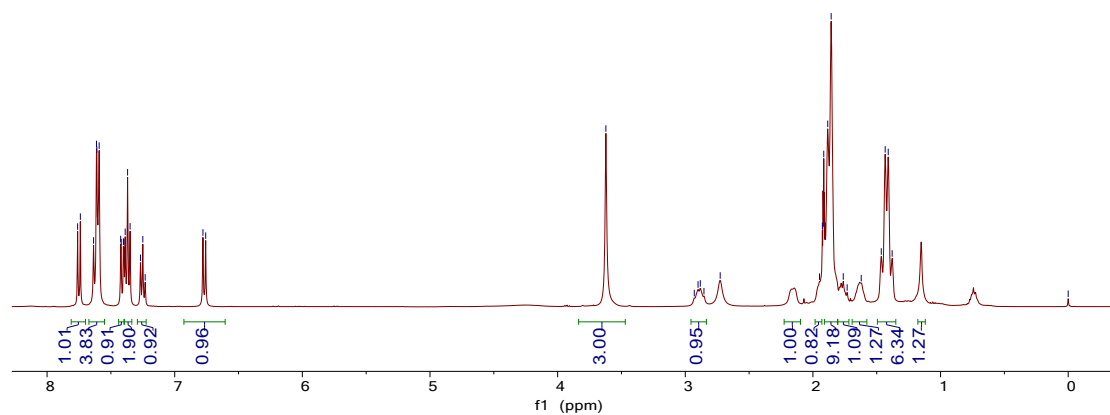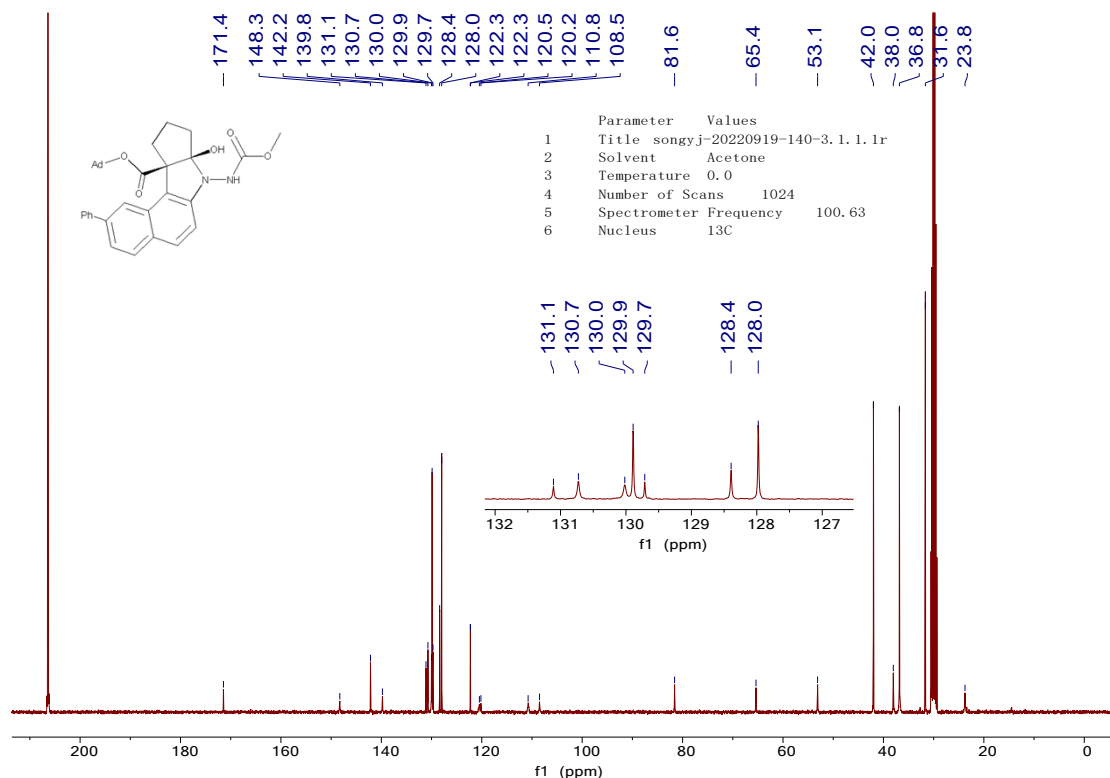

C31:

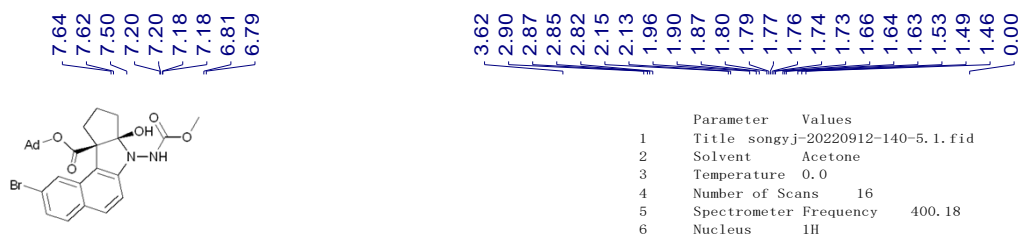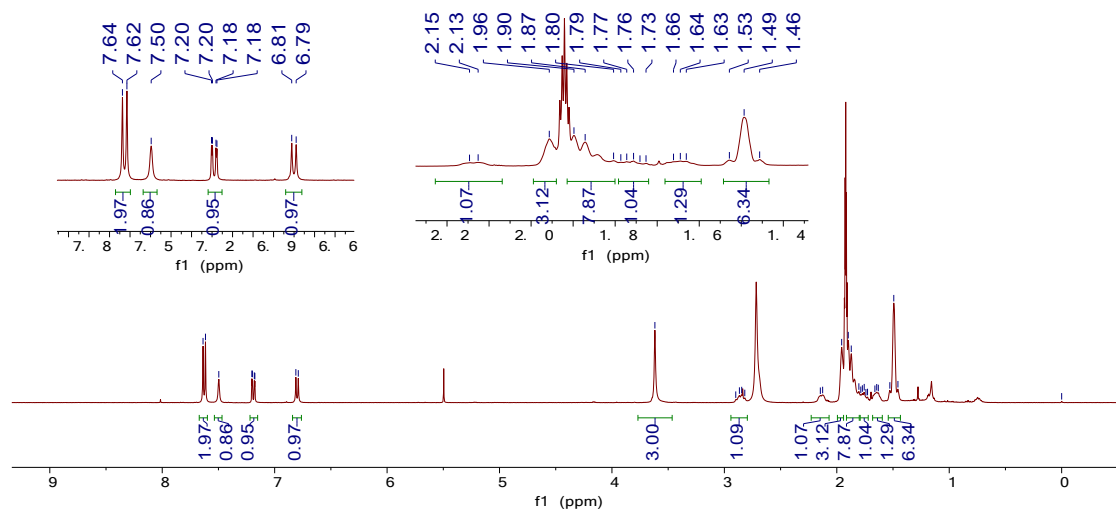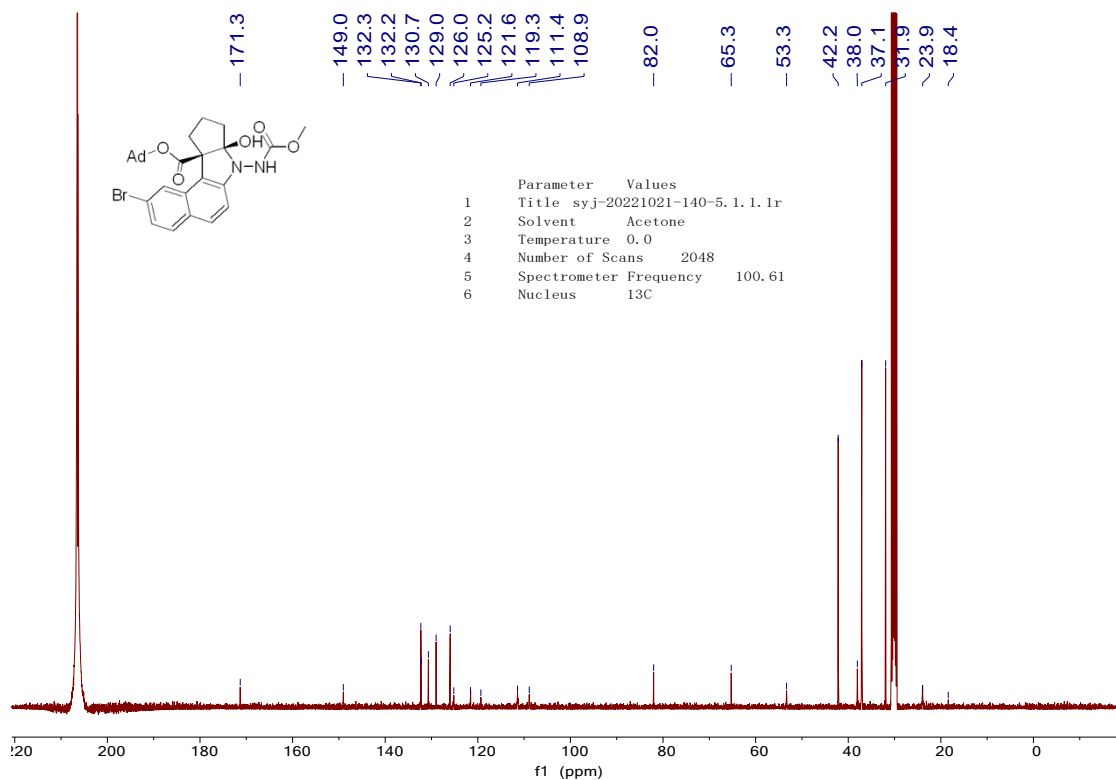

**D1:**

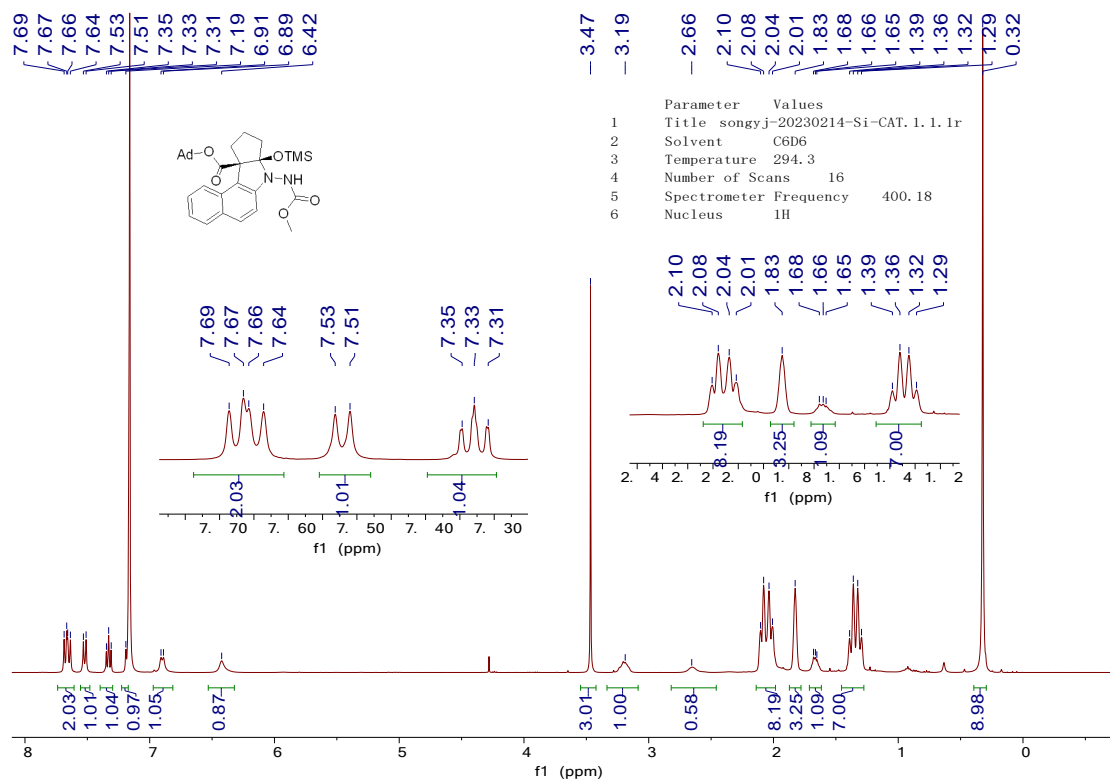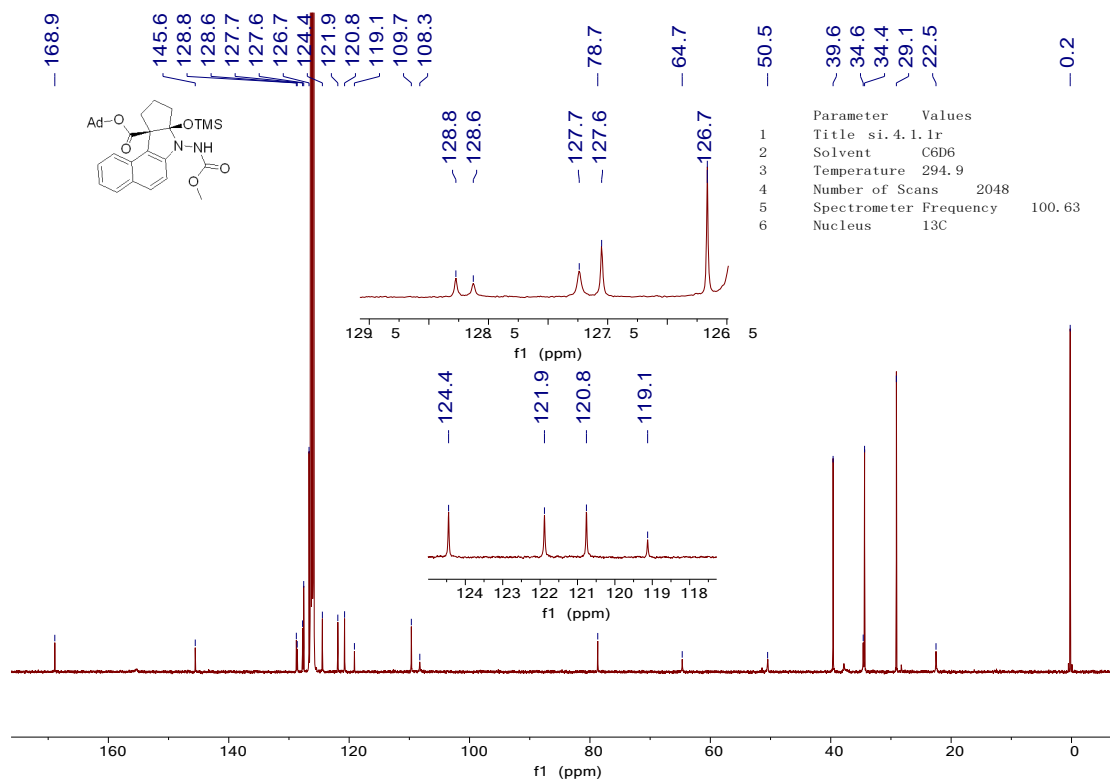

D2:

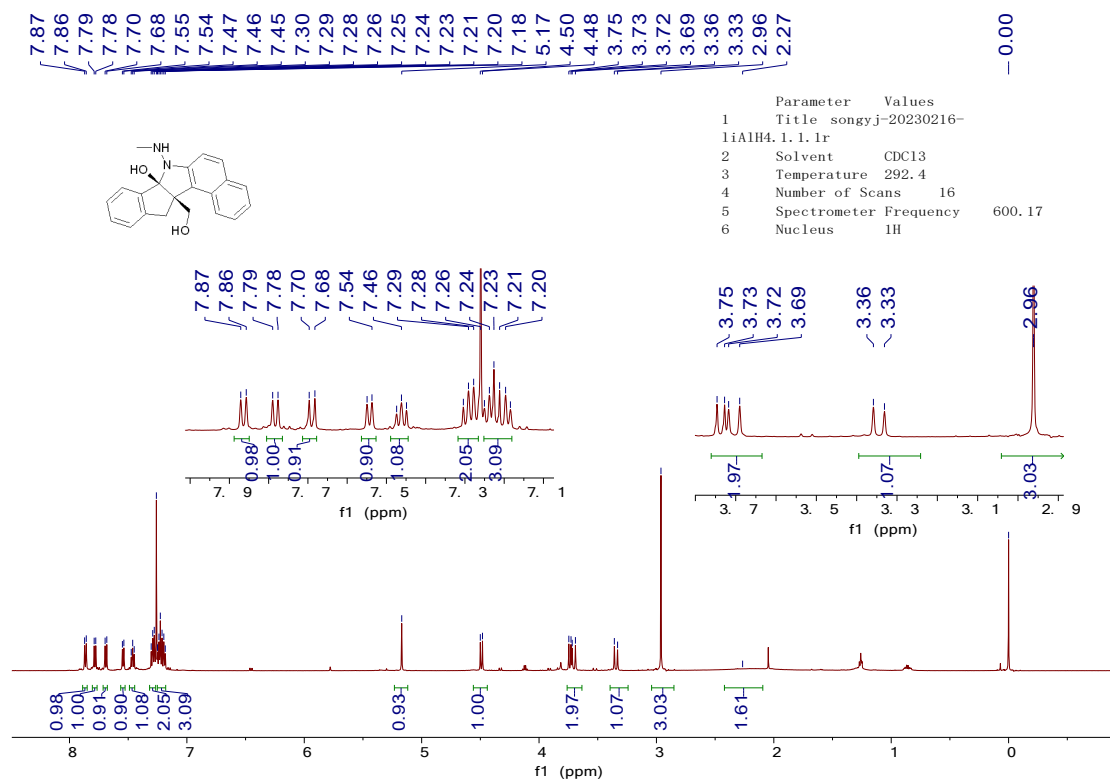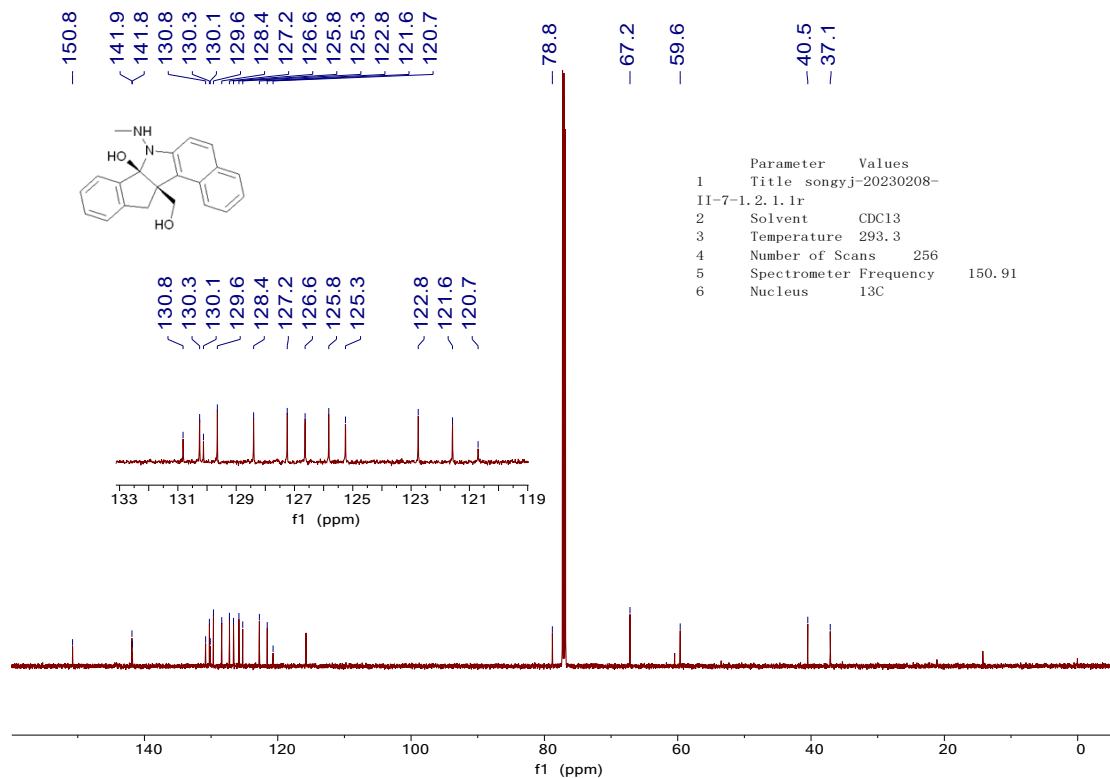



The <sup>1</sup>H NMR of the trans-isomers:

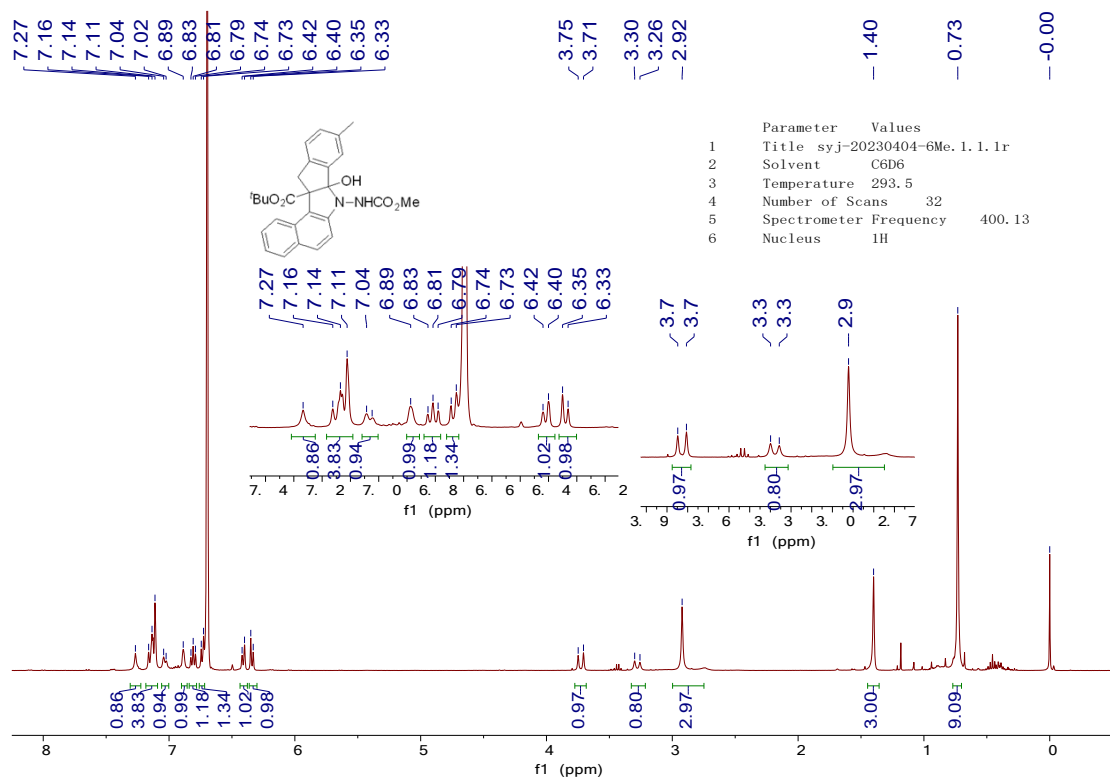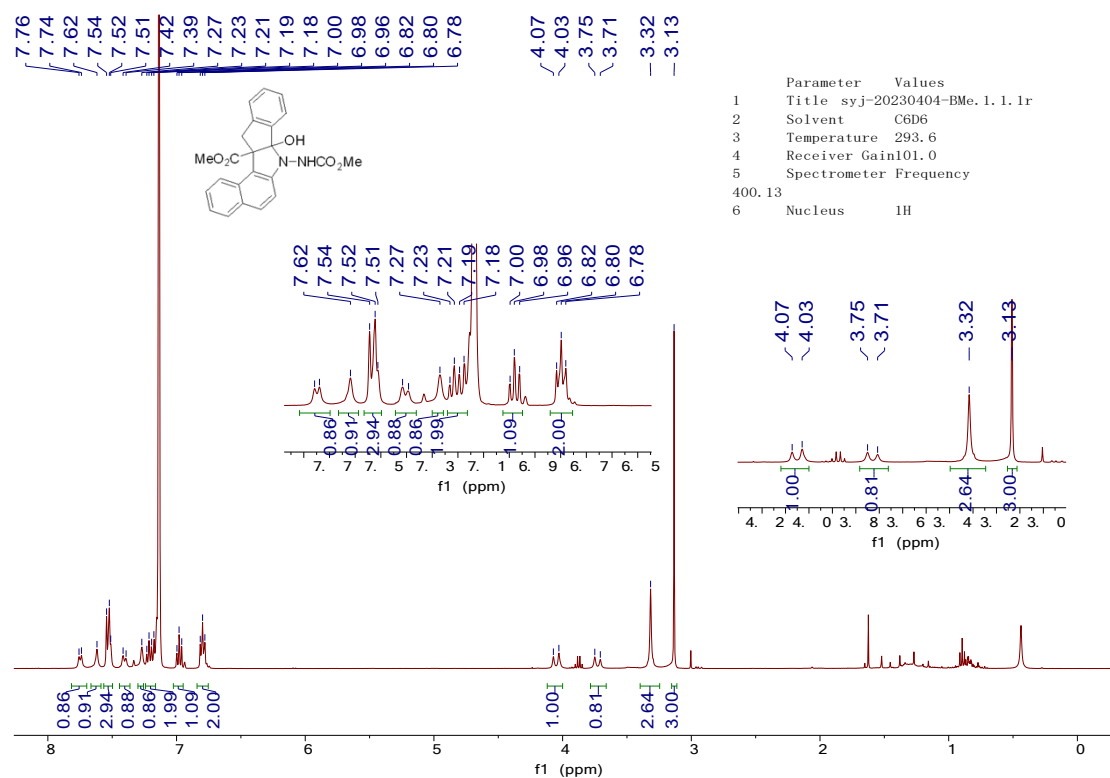



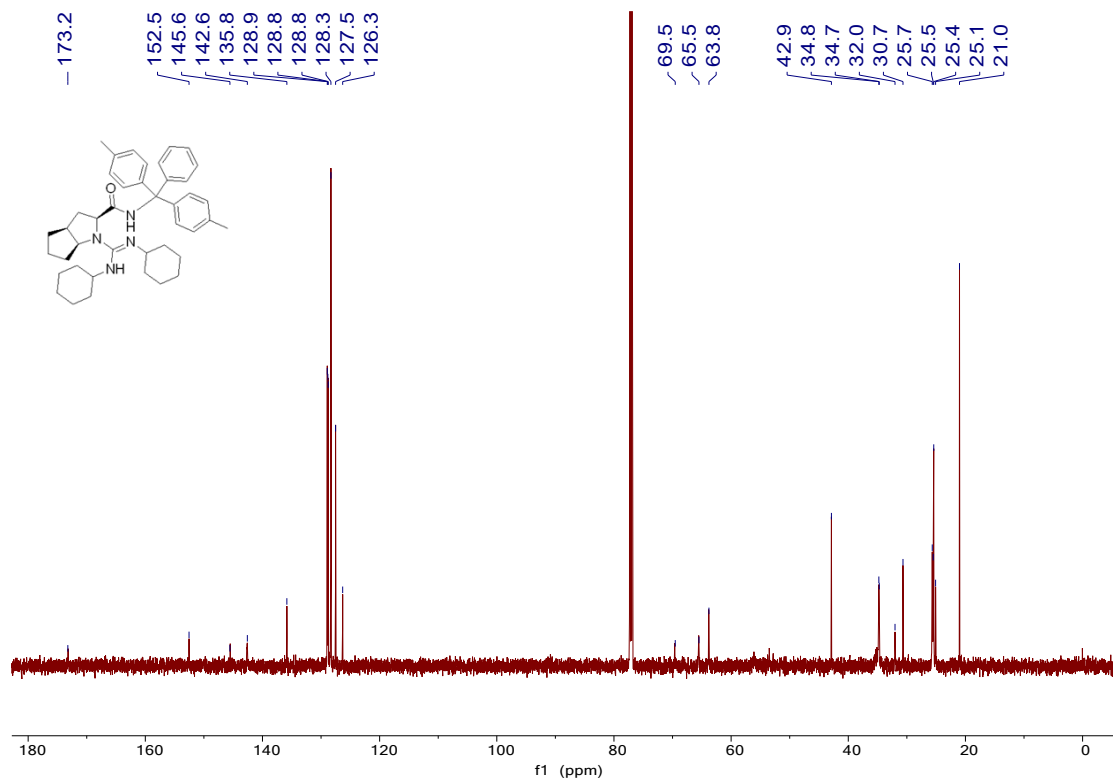

**G20:**

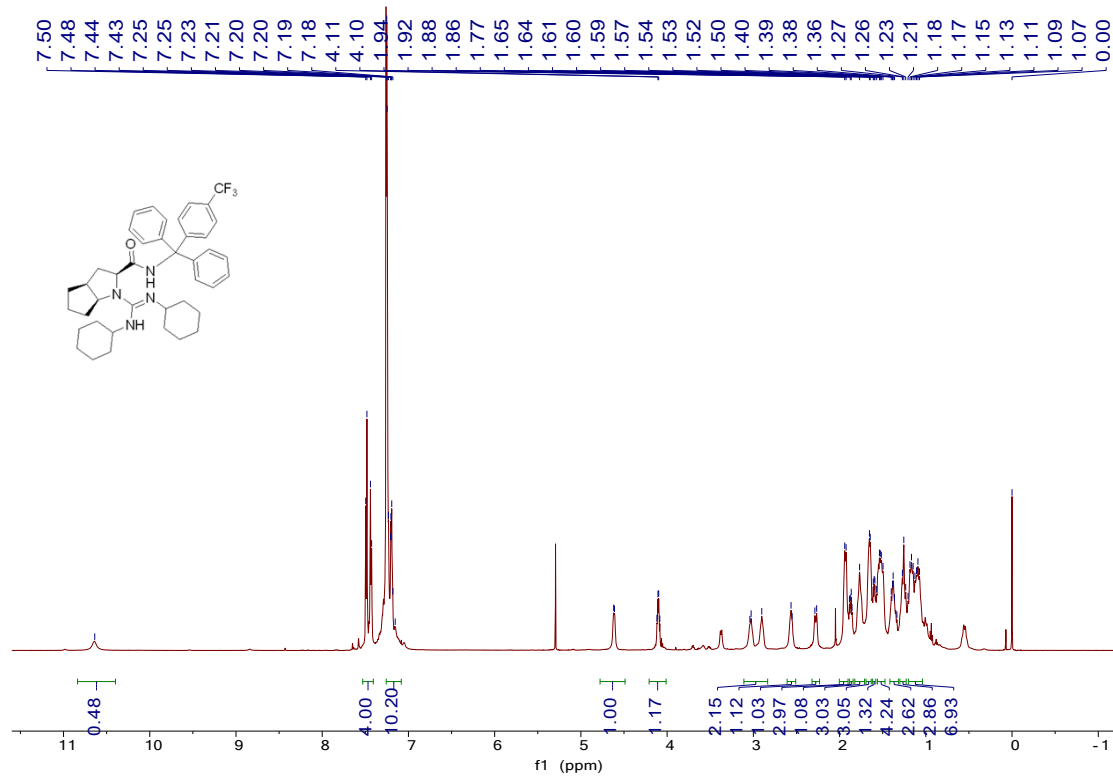

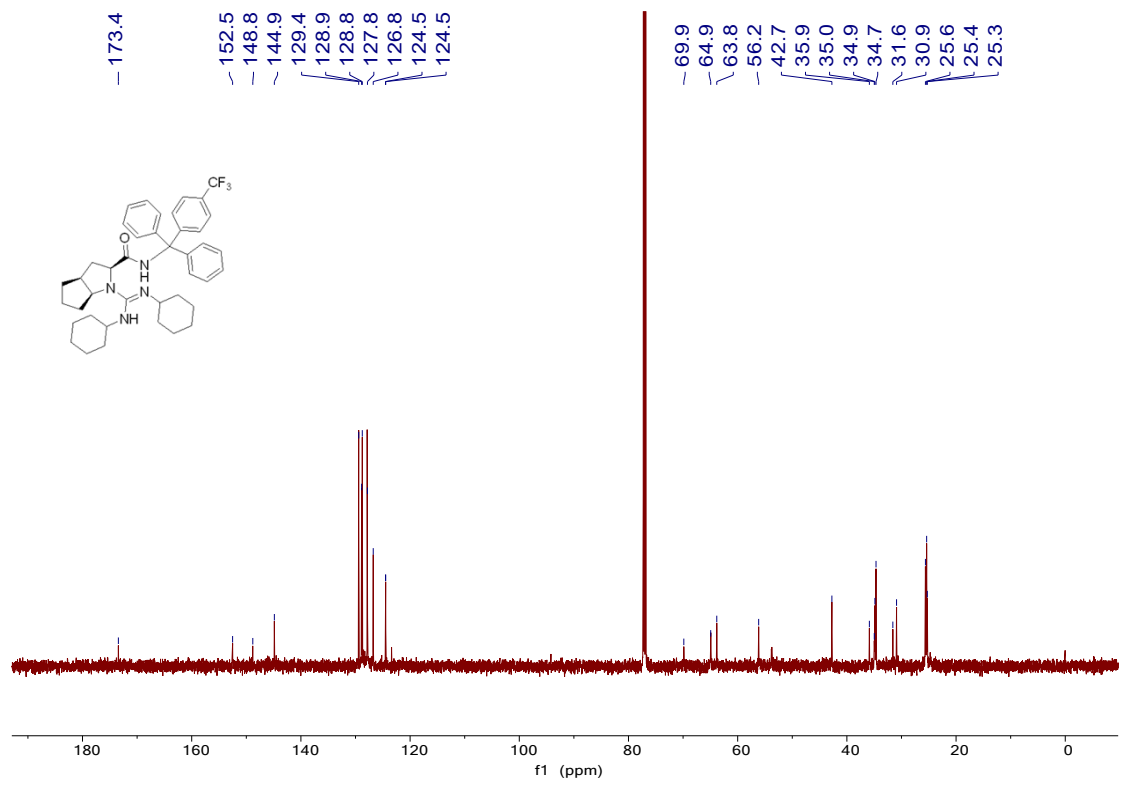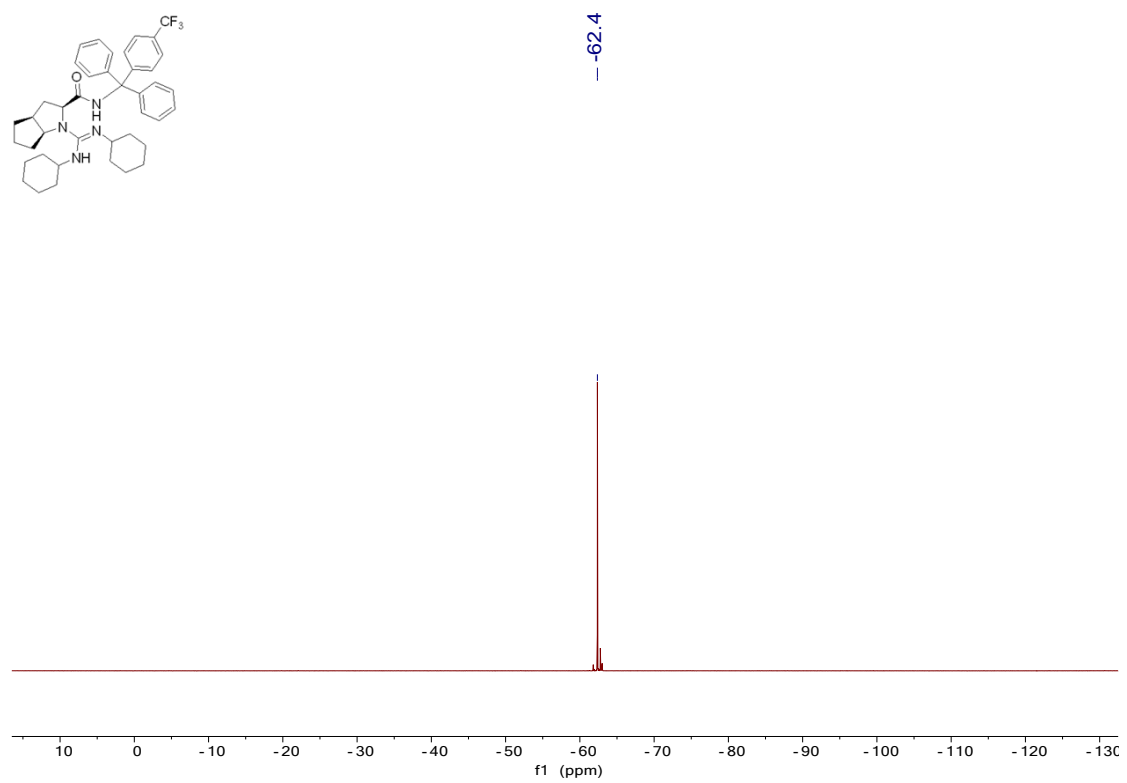

## 12. Copies of CD spectra of the products

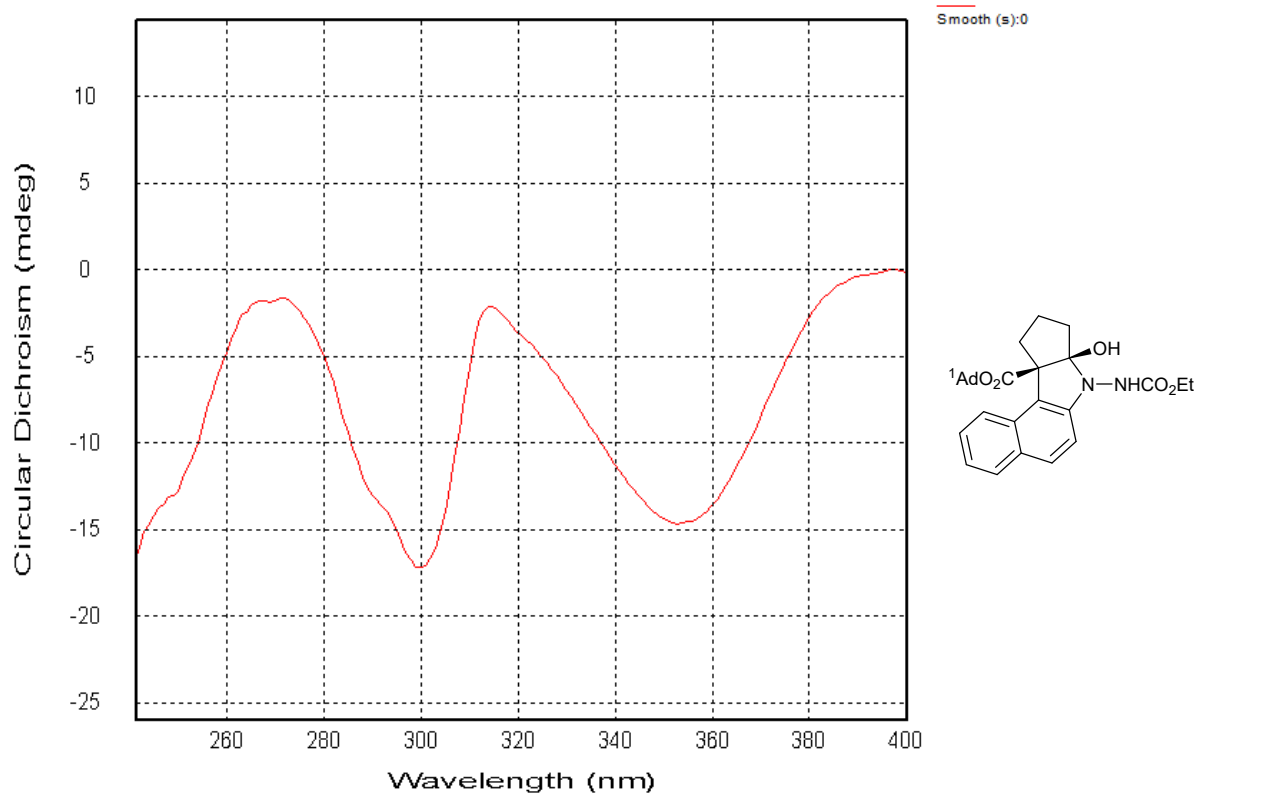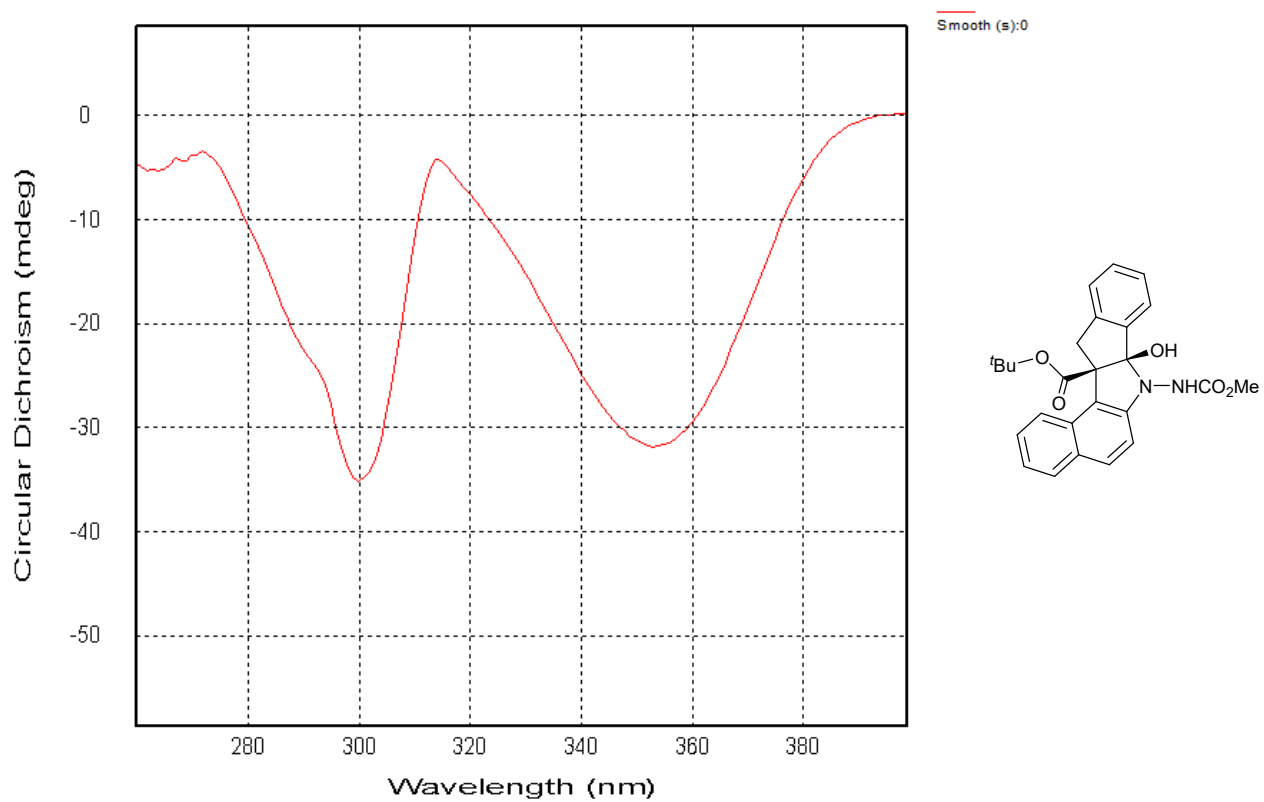

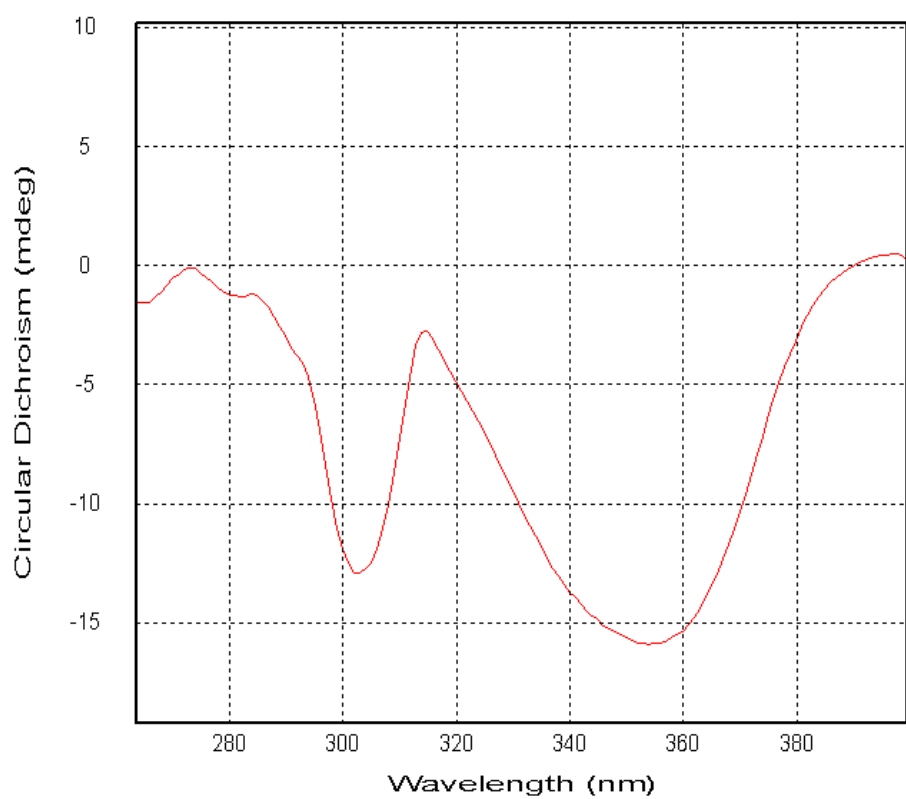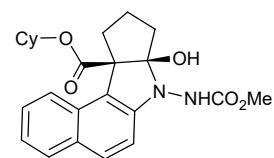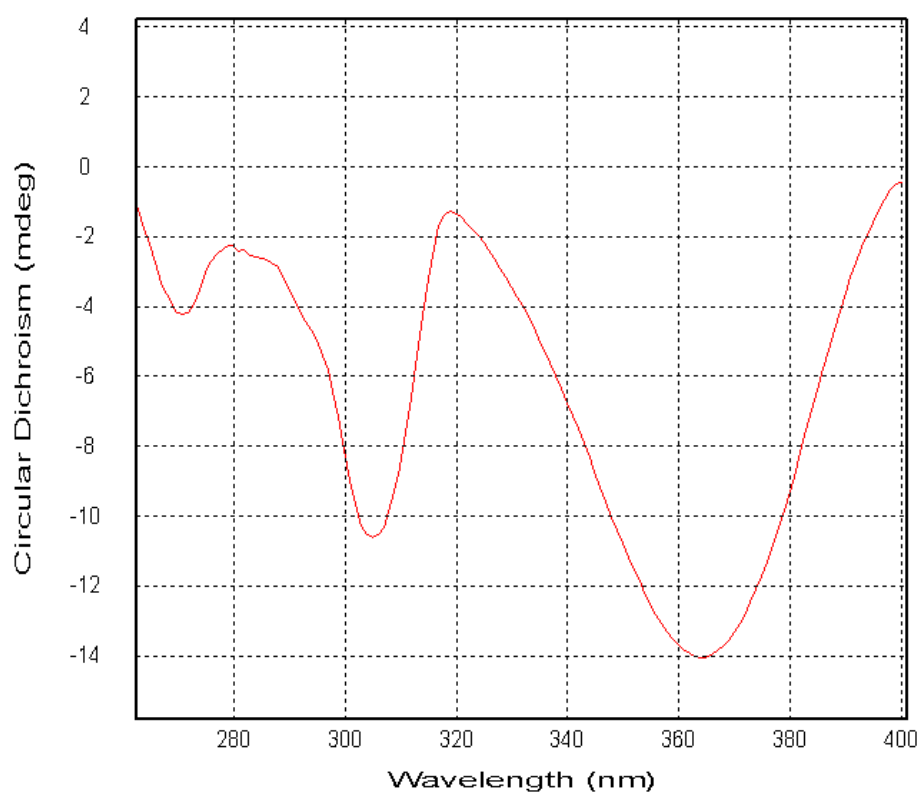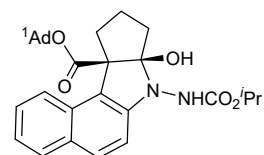

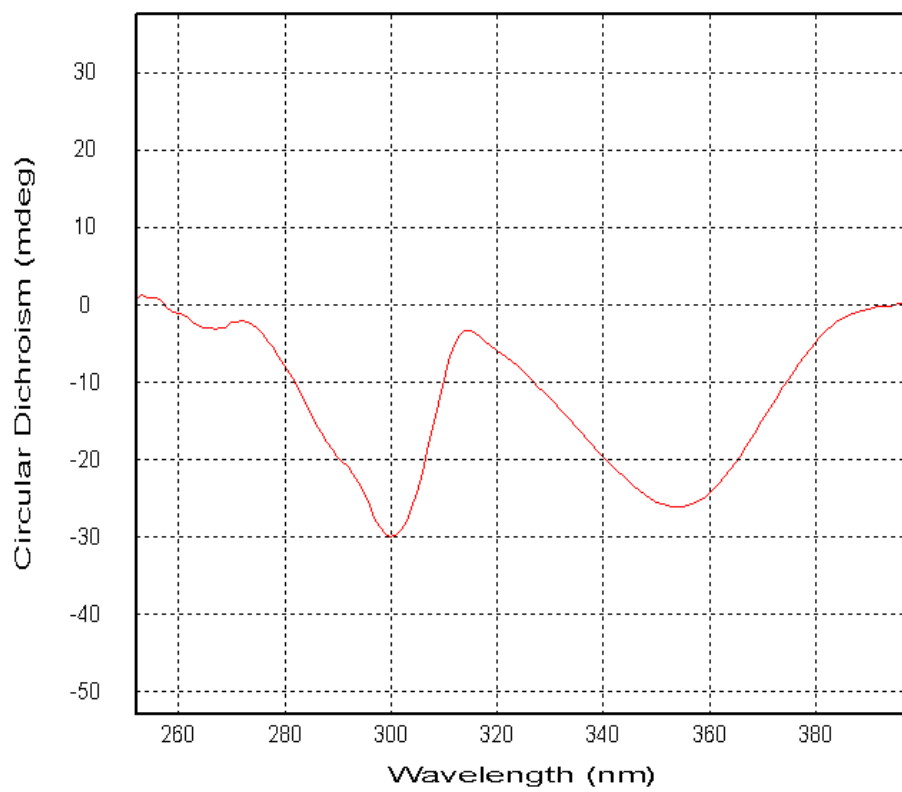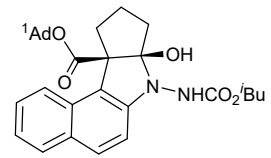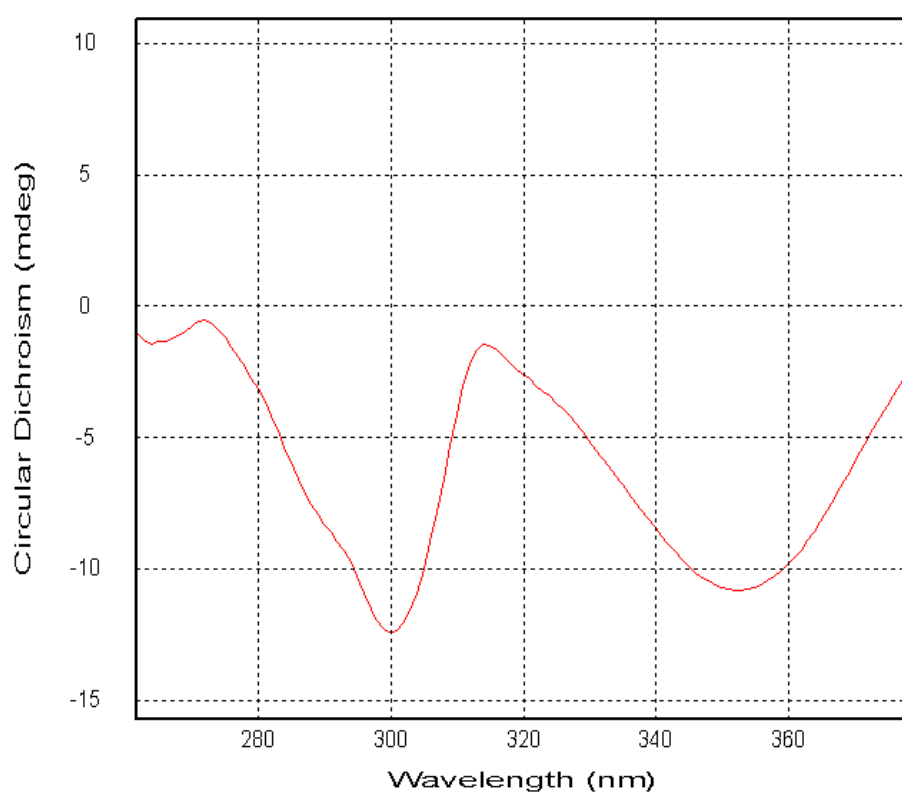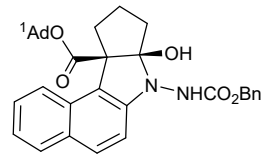

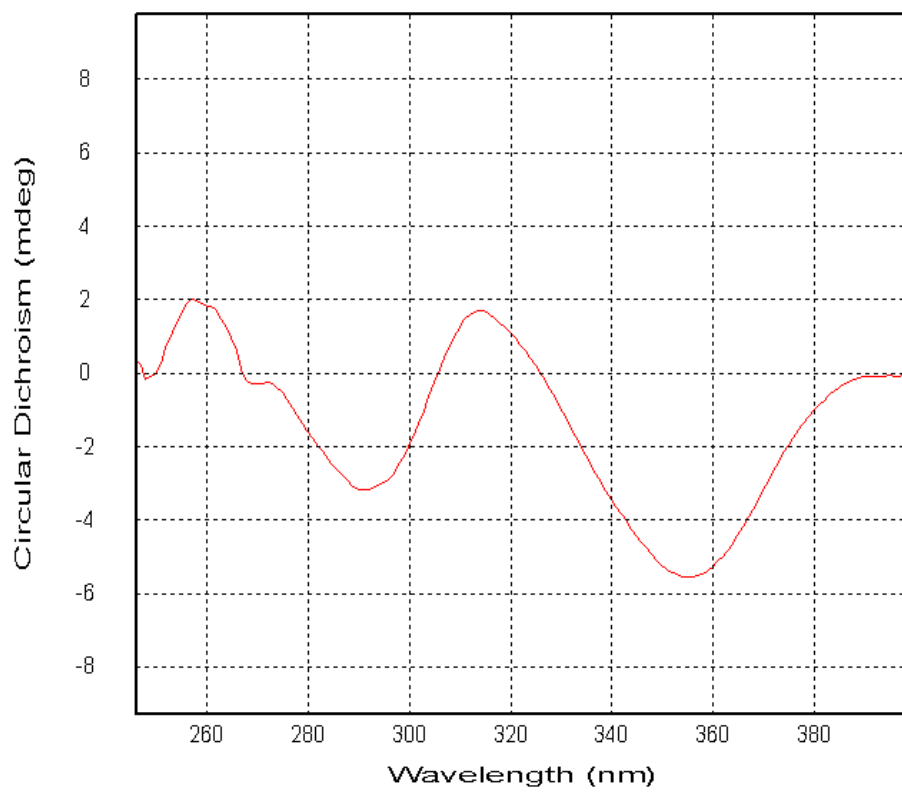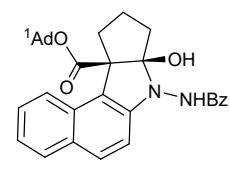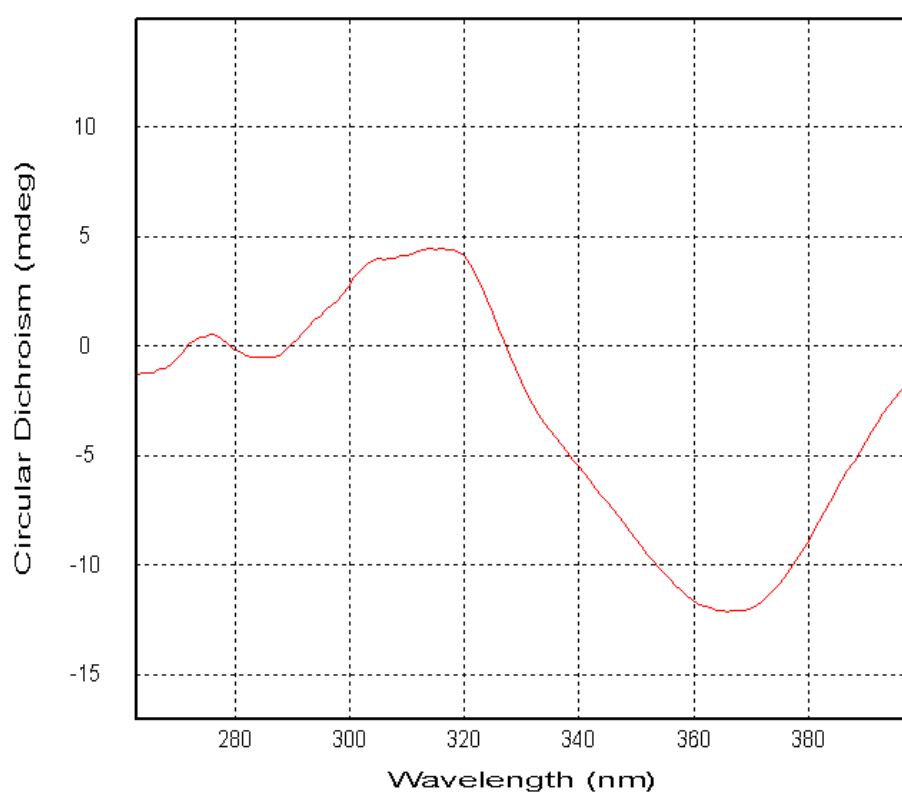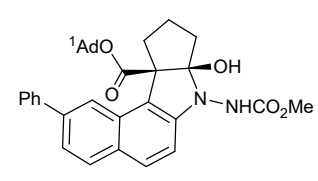



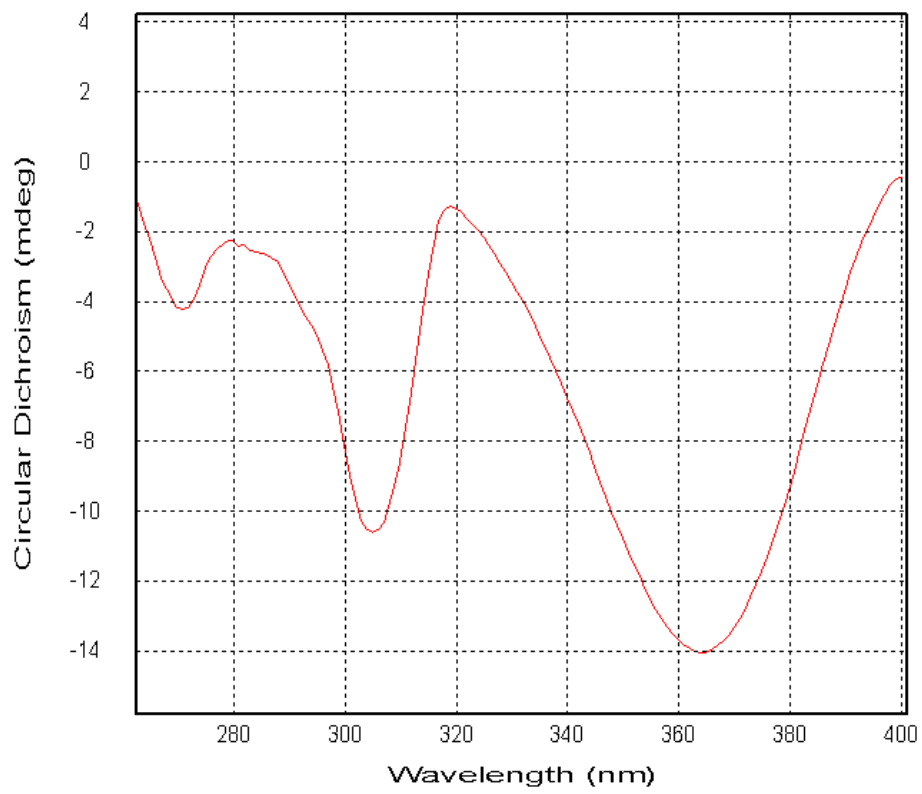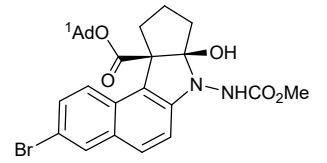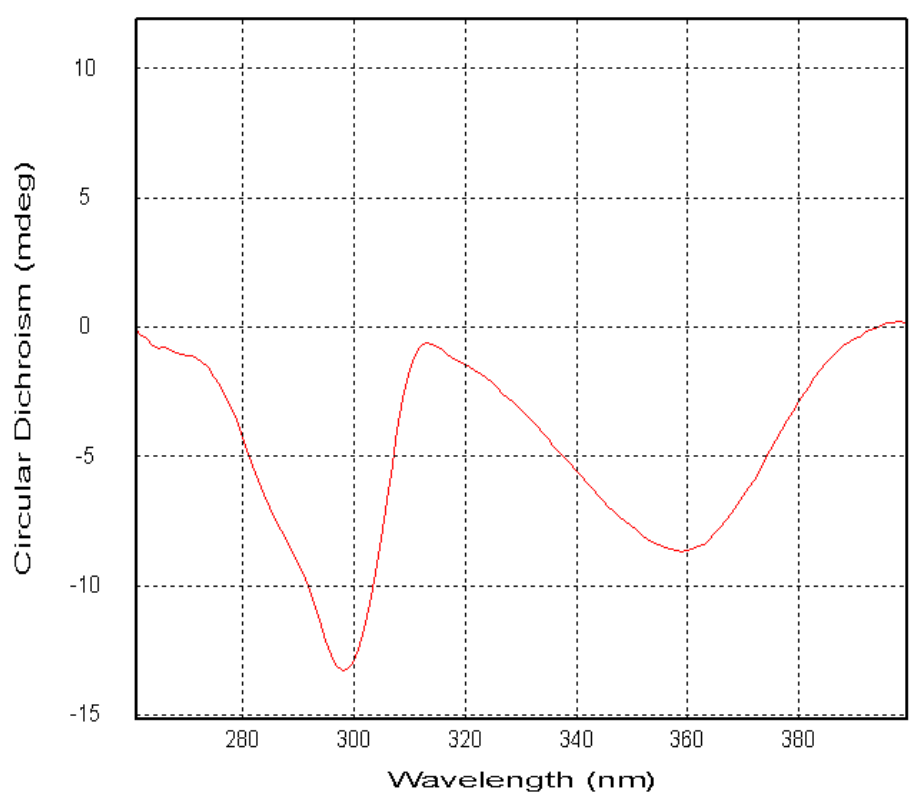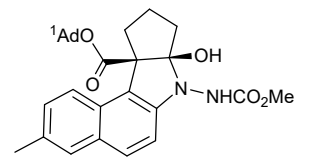

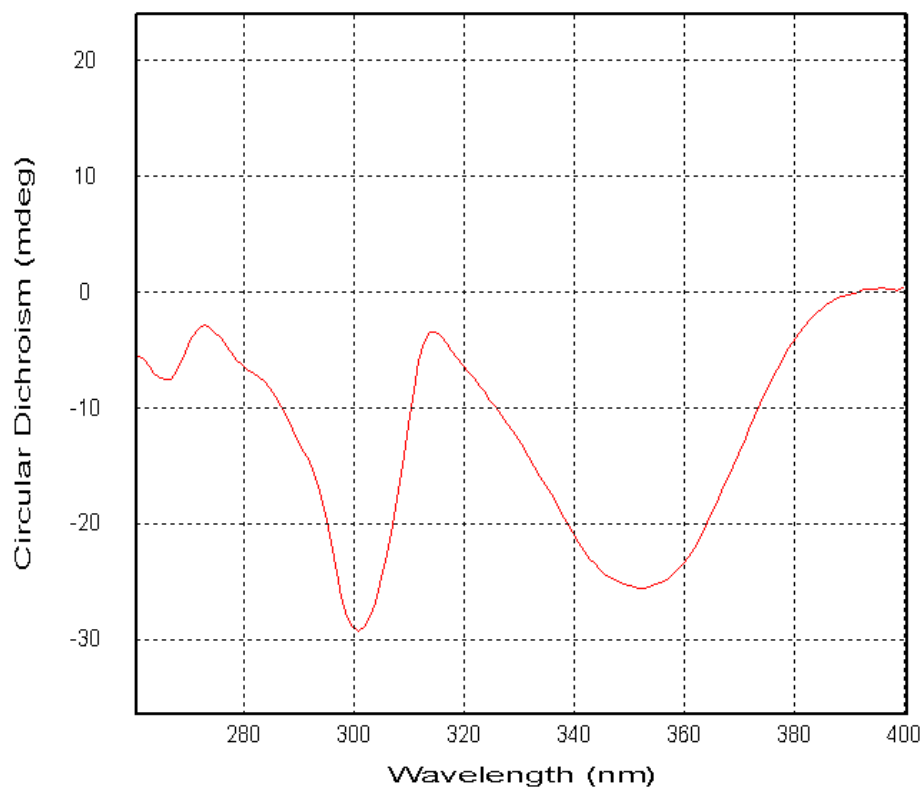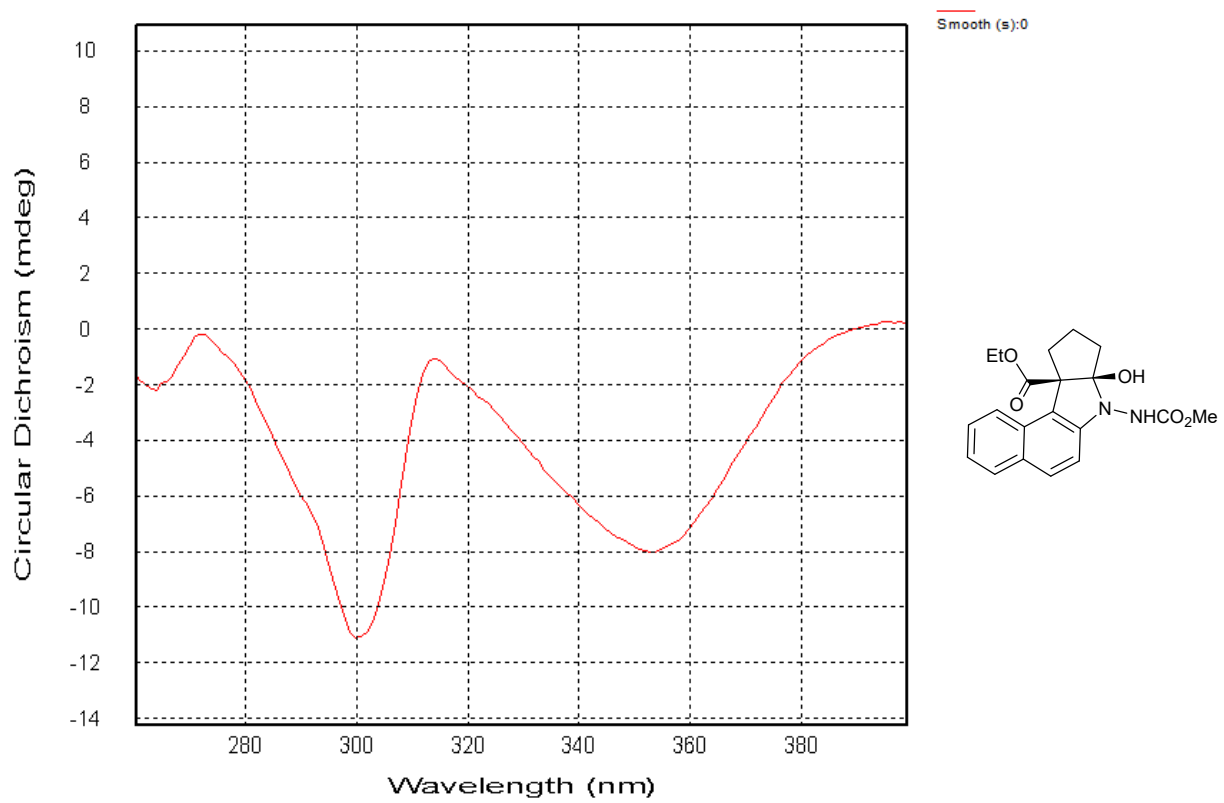

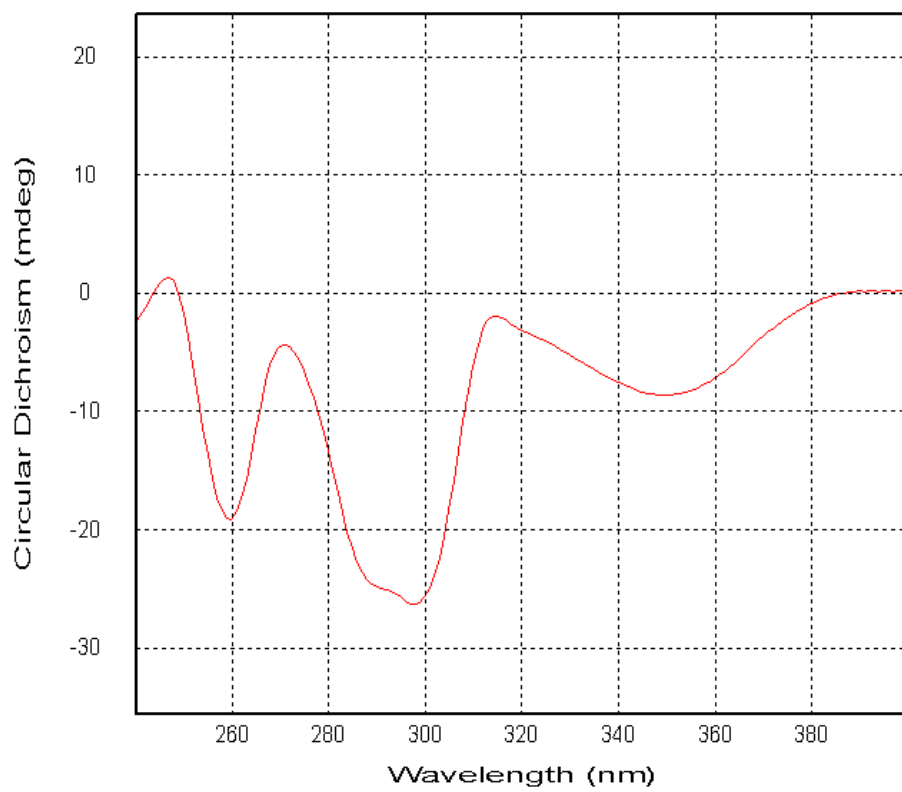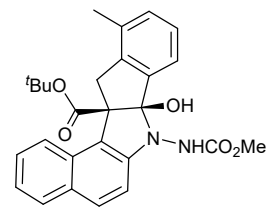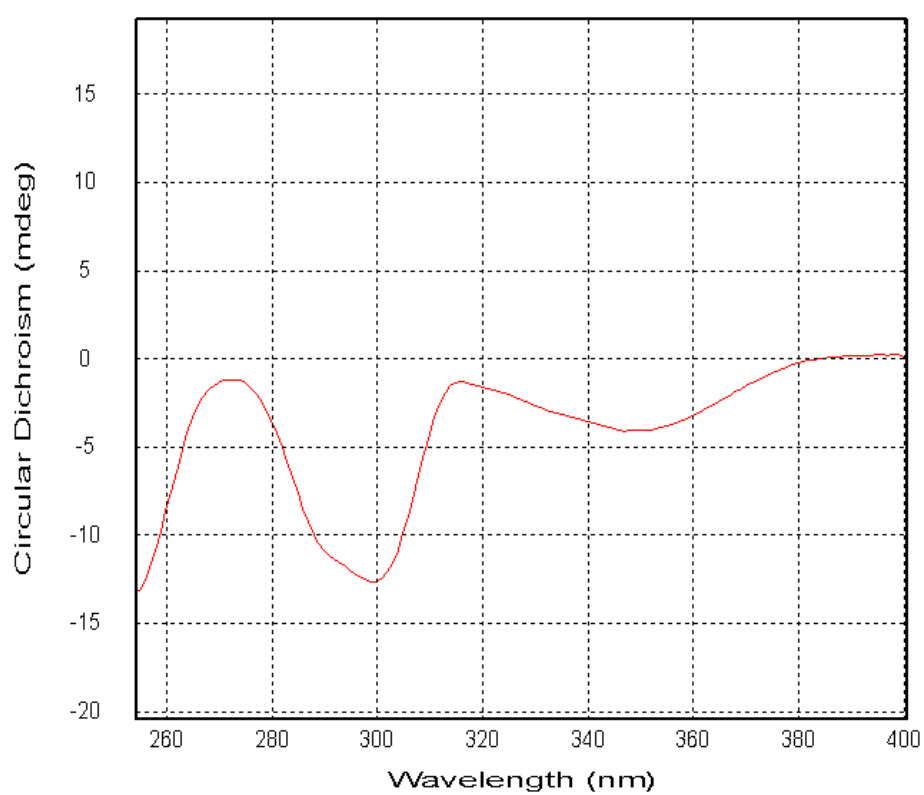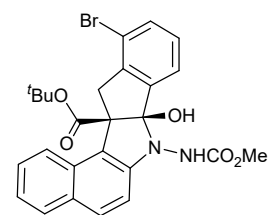

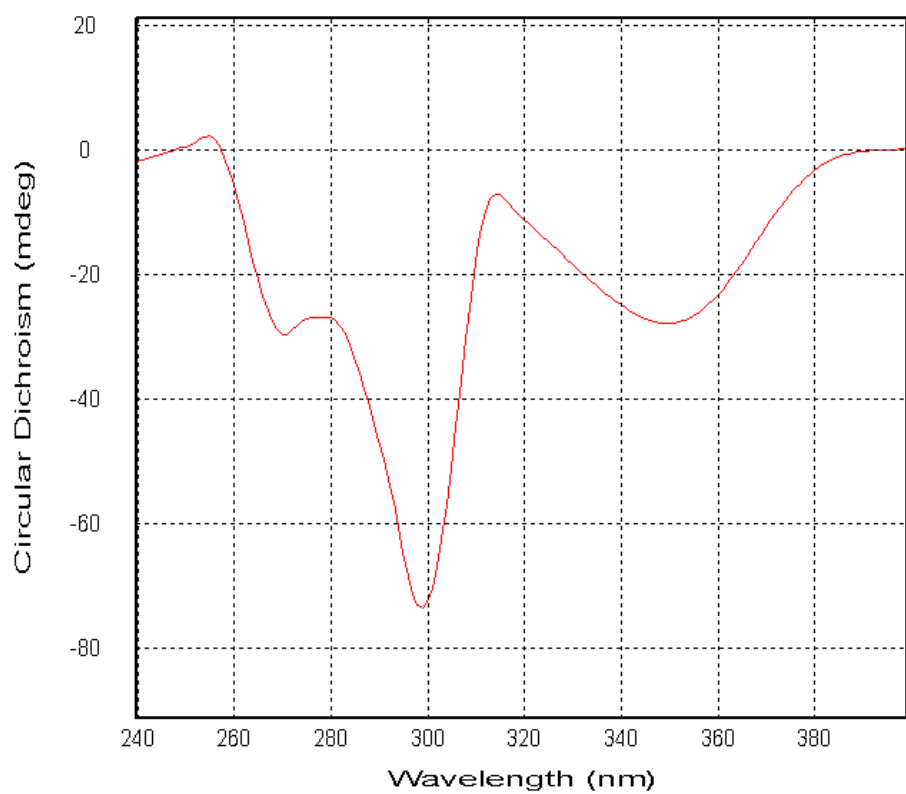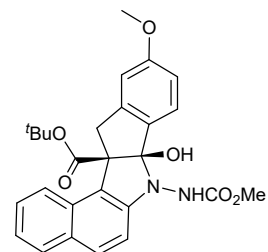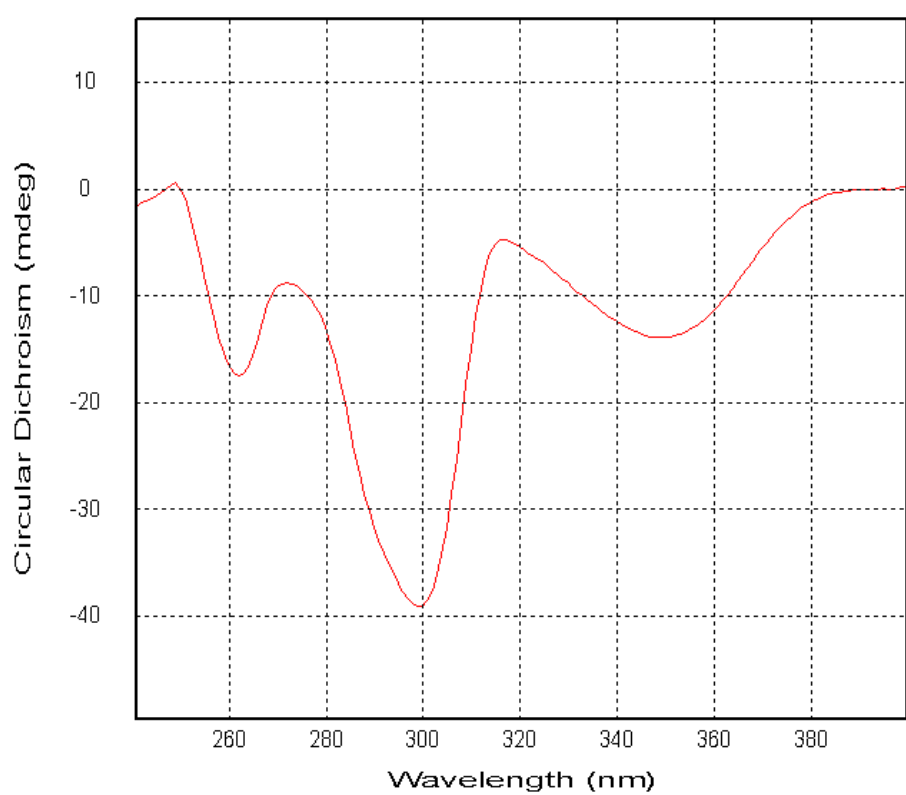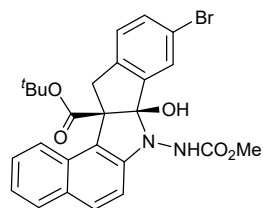

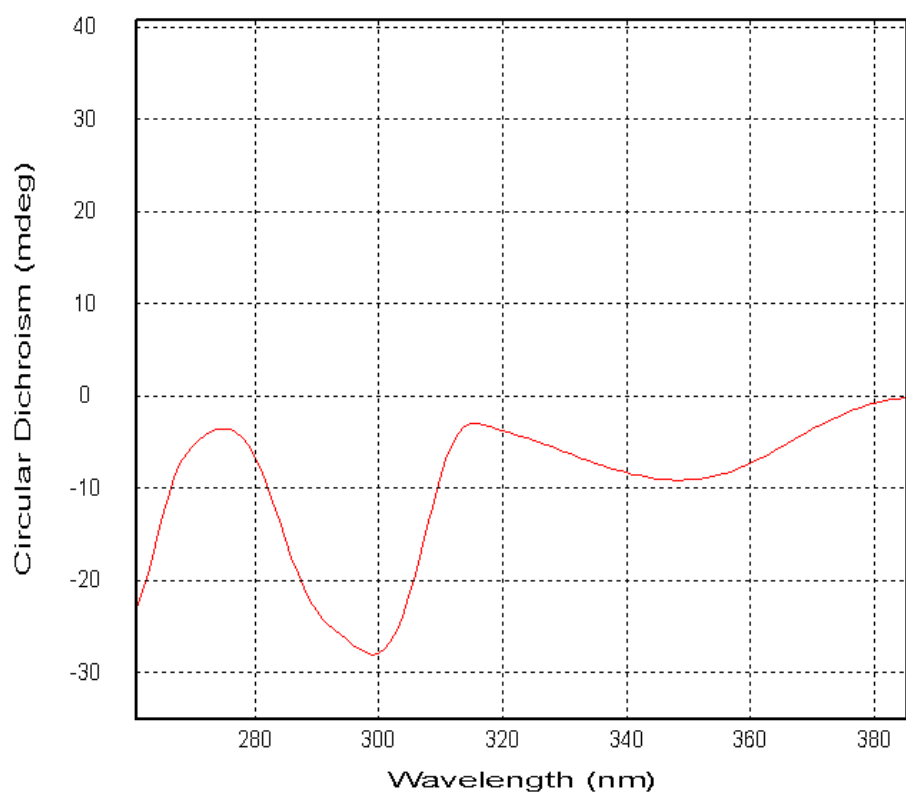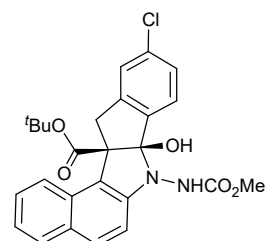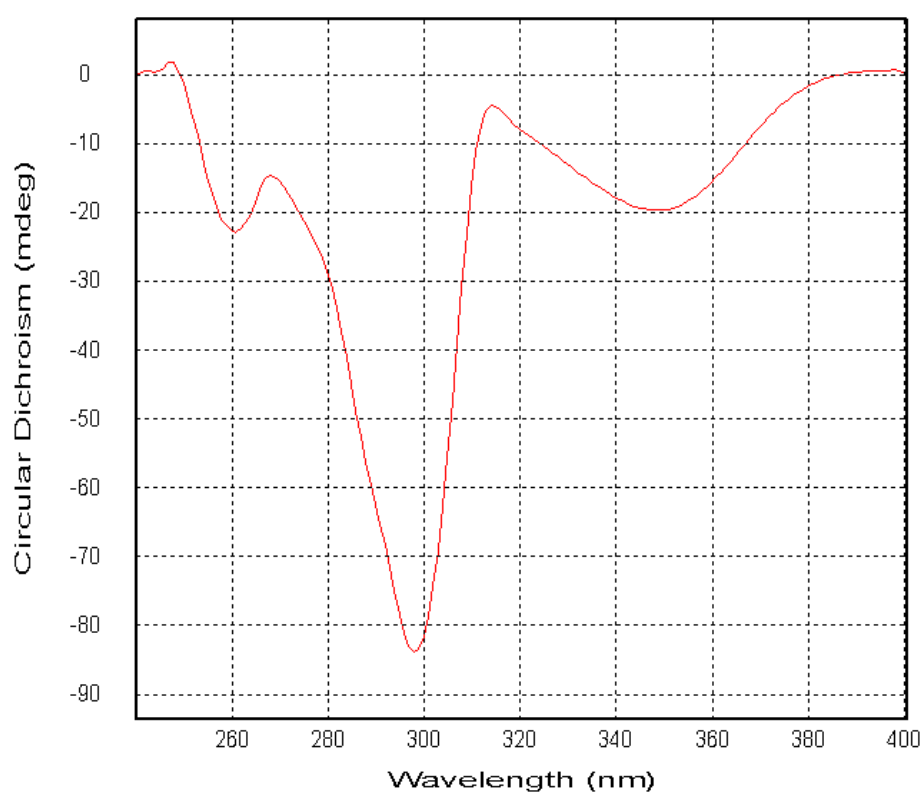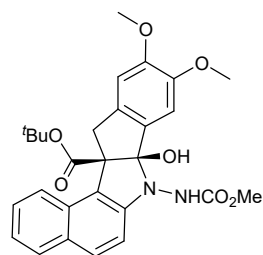

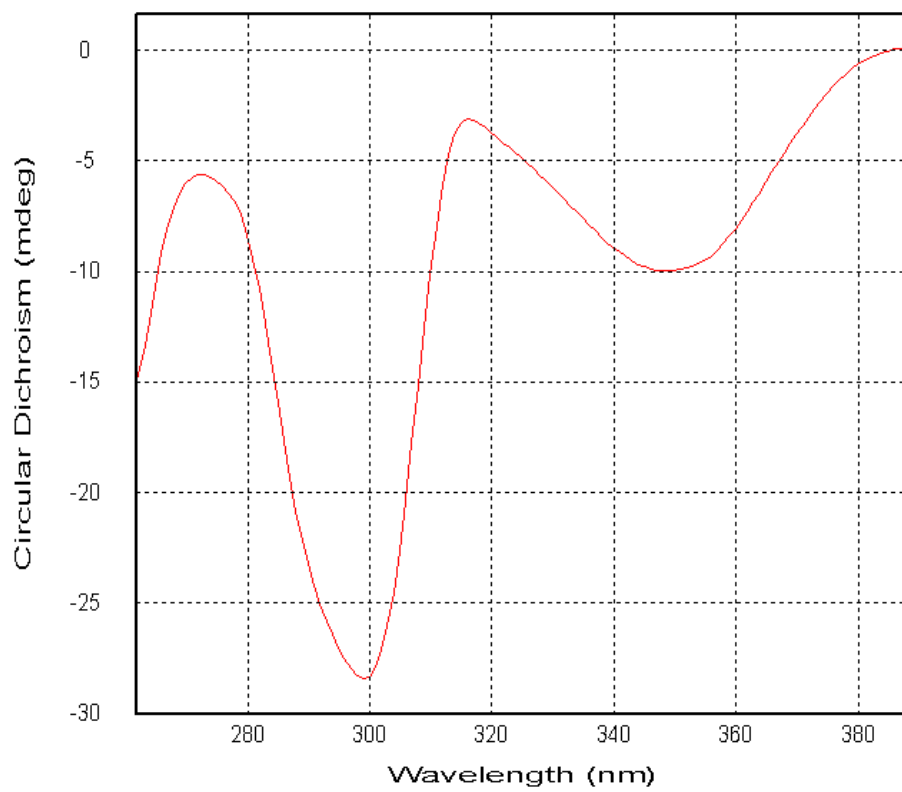

Smooth (s):0

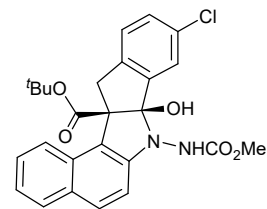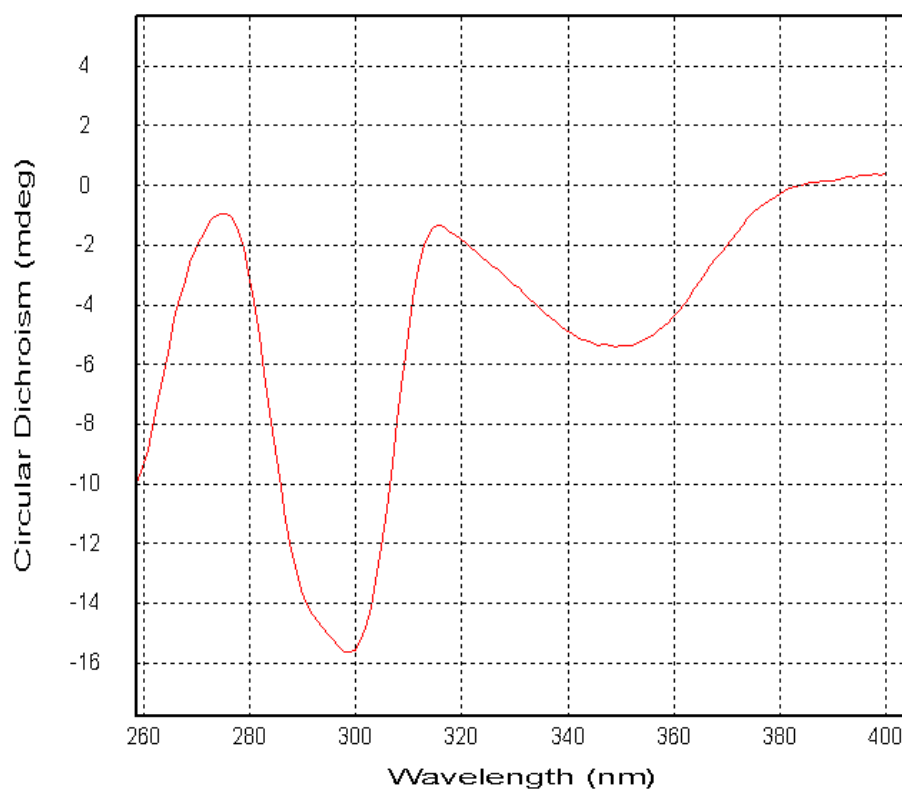

Smooth (s):0

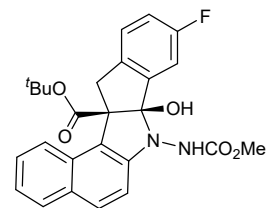

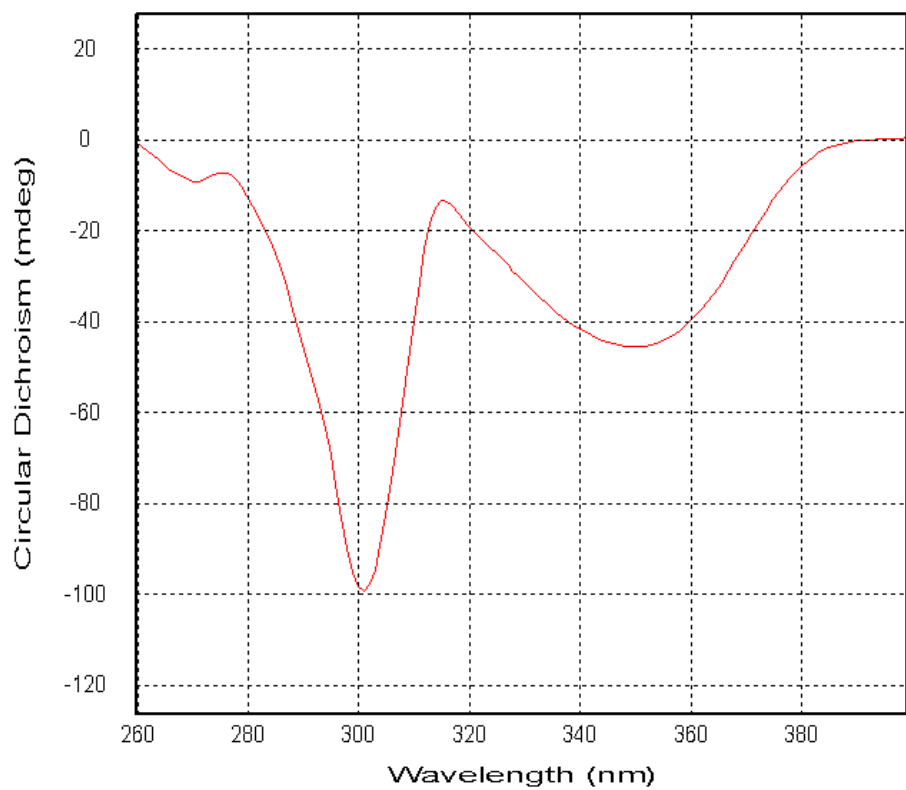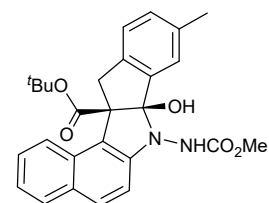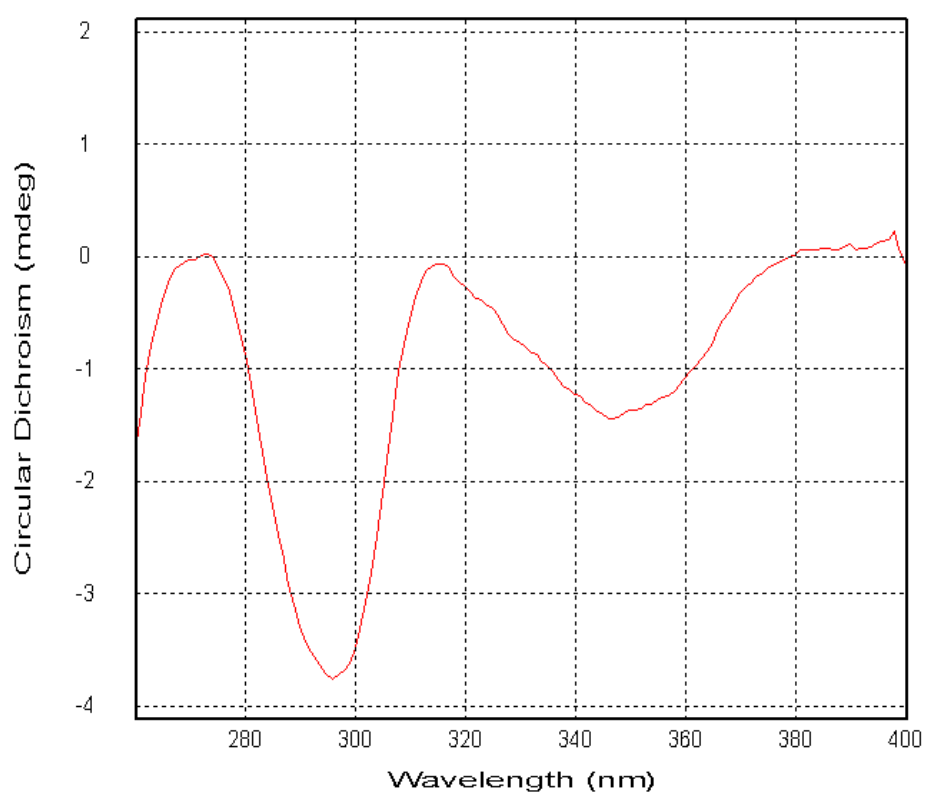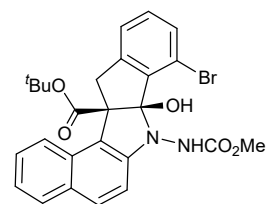

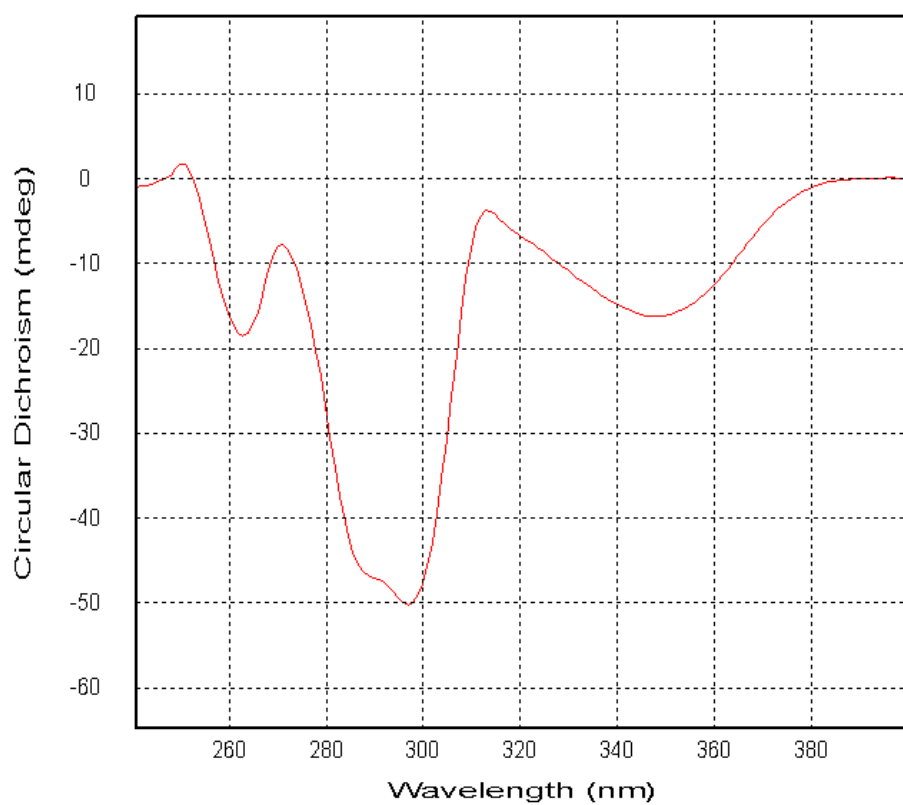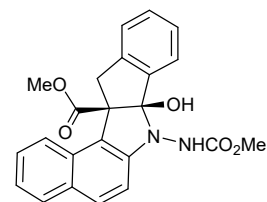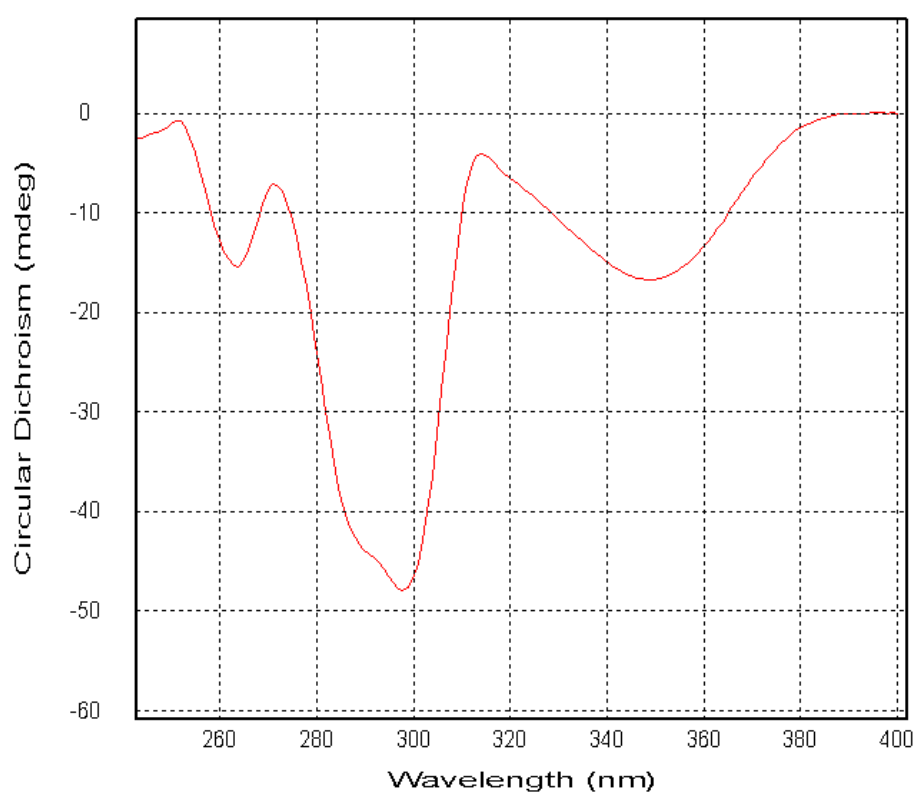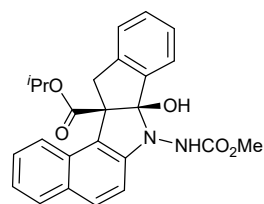



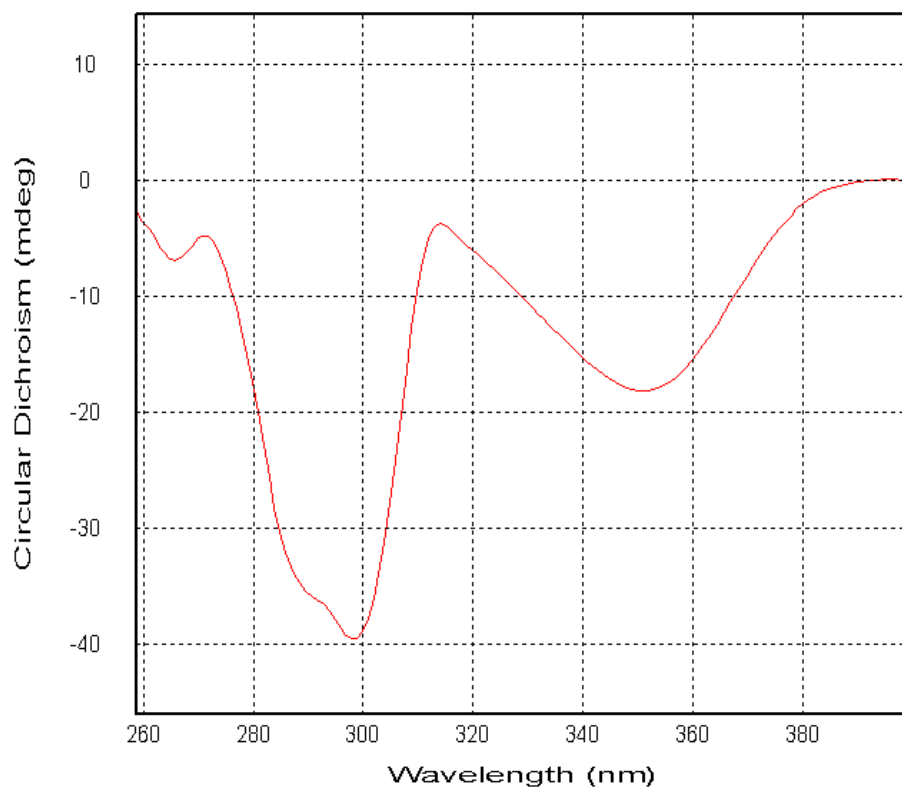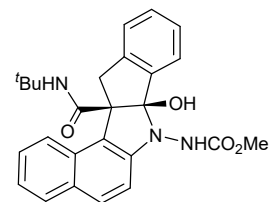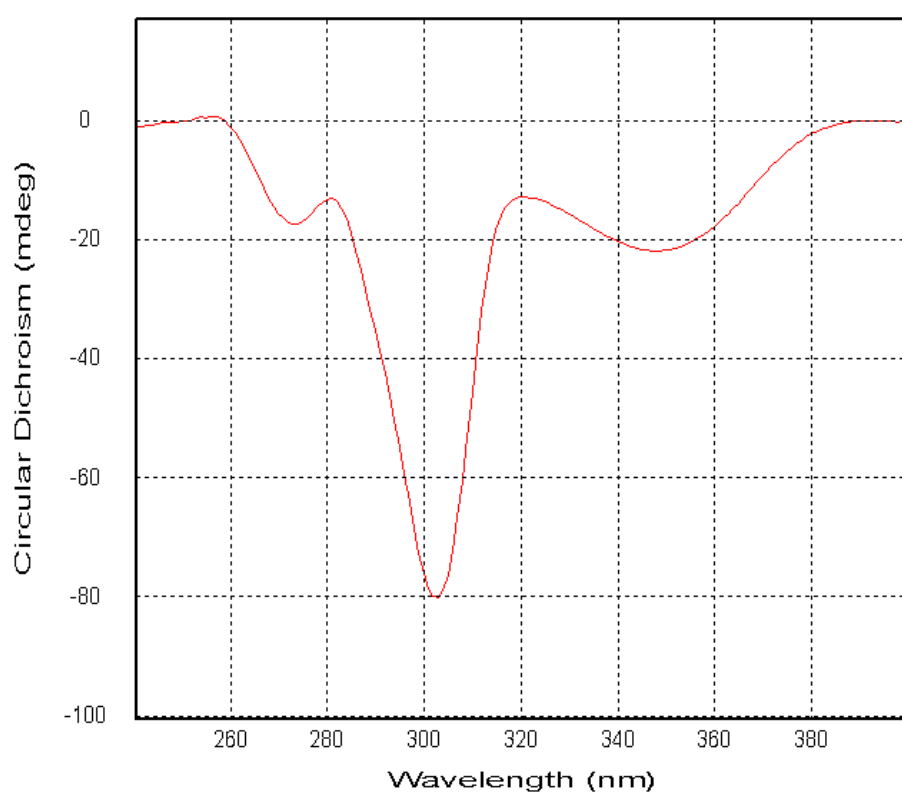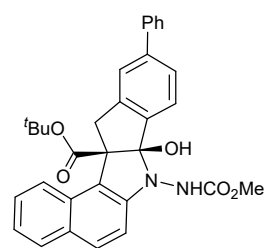

### 13. Reference.

1. L. W. Qi, J. H. Mao, J. Zhang, B. Tan, Organocatalytic asymmetric arylation of indoles enabled by azo groups, *Nat. Chem.*, 2018, **10**, 58-64.
2. (1). X. Y. Zhang, W. B. Wu, W. D. Cao, H. Yu, X. Xu, X. H. Liu, X. M. Feng, Enantioselective Radical-Polar Crossover Reactions of Indanonecarboxamides with Alkenes, *Angew. Chem. Int. Ed.*, 2020, **59**, 4846-4850. (2). C. Q. He, Z. K. Wu, Y. Q. Zhou, W. D. Cao, X. M. Feng, Asymmetric catalytic nitroxylation and azidation of  $\beta$ -keto amides/esters with hypervalent iodine reagents, *Org. Chem. Front.*, 2022, **9**, 703-708.
3. Z. P. Yu, X. H. Liu, L. Zhou, L. L. Lin, X. M. Feng, Bifunctional Guanidine via an Amino Amide Skeleton for Asymmetric Michael Reactions of  $\beta$ -Ketoesters with Nitroolefins: A Concise Synthesis of Bicyclic  $\beta$ -Amino Acids, *Angew. Chem. Int. Ed.*, 2009, **48**, 5195-5198.
4. S. X. Dong, X. H. Liu, X. H. Chen, F. Mei, Y. L. Zhang, B. Gao, L. L. Lin, X. M. Feng, Chiral Bisguanidine-Catalyzed Inverse-Electron-Demand Hetero-Diels–Alder Reaction of Chalcones with Azlactones, *J. Am. Chem. Soc.*, 2010, **132**, 10650-10651.
